# Supplementary material for: Proteomics and lipidomics reveal the protective mechanism of dietary n-3 PUFA supplementation for photoaging
Source: Royal Society of Chemistry journal article supplement (doi:10.1039/d0fo03228j), 2021-01-01
Supplement: d0fo03228j2.xlsx [file d0fo03228j2.xlsx]

## Sheet: UF vs UC
Accession	Gene Name	AF-1/REF	AF-2/REF	AF-3/REF	average AF	AC-1/REF	AC-2/REF	AC-3/REF	average AC	AF/AC	t test p value
Q00547	Hmmr	1.80759	1.90306	1.71212	1.80759	0.533417	0.469072	0.597762	0.533417	3.38871	4.3642e-05
Q91Z98	Chil4	1.44545	1.43346	1.43945	1.43945	0.546603	0.792941	0.669772	0.669772	2.14917	0.000415288
P39654	Alox15	1.53834	1.45035	1.6041	1.53093	1.04406	1.03206	0.714651	0.930257	1.6457	0.00675639
Q9D2R6	Coa3	1.12987	1.32688	1.28178	1.24617	0.974589	0.715451	0.80523	0.831757	1.49824	0.0127266
Q8C138	Adtrp	1.26396	1.33742	1.1905	1.26396	0.851394	0.72593	0.976858	0.851394	1.48458	0.00795773
Q9D1F4	Akt1s1	1.13982	1.21248	1.36583	1.23937	0.897888	0.838033	0.805666	0.847196	1.46291	0.00548557
Q61878	Prg2	1.66494	1.4271	1.21281	1.43495	0.907887	1.02111	1.02311	0.984038	1.45822	0.0295139
Q9QXY9	Pex3	1.25408	1.40506	1.14016	1.26643	0.971881	0.737241	0.900094	0.869738	1.45611	0.0185508
A2AQP0	Myh7b	1.12964	1.20826	1.28687	1.20826	0.885946	0.842889	0.799833	0.842889	1.43347	0.00212267
Q9CR41	Hypk	1.36007	1.24954	1.16886	1.25949	0.735195	0.924924	0.982445	0.880855	1.42985	0.0152131
Q9R160	Adam24	1.29501	1.17297	1.05094	1.17297	0.83041	0.82497	0.81953	0.82497	1.42184	0.00784873
O70373	Xirp1	1.48851	1.30136	1.11421	1.30136	0.91575	0.917688	0.919626	0.917688	1.41808	0.0237857
P13541	Myh3	1.34032	1.02353	1.08047	1.14811	0.713335	0.883623	0.841391	0.812783	1.41256	0.0382189
Q9D8T4	Tvp23b	1.10231	1.07678	1.05125	1.07678	0.694356	0.764105	0.833853	0.764105	1.4092	0.00188059
Q9DCN1	Nudt12	1.19286	1.30778	1.25032	1.25032	0.983807	0.791793	0.8878	0.8878	1.40833	0.00495413
Q8BFZ3	Actbl2	1.13439	1.12728	1.39978	1.22048	0.873735	0.933334	0.848151	0.885074	1.37896	0.0227463
Q9D6H2	Hspb11	1.11216	1.24553	1.3789	1.24553	0.96404	0.905296	0.846553	0.905296	1.37582	0.0155566
Q91YD3	Dcp1a	1.22083	1.10379	1.33788	1.22083	0.893004	0.966867	0.81914	0.893004	1.36711	0.0148213
Q9D1C9	Rrp7a	1.15267	1.20733	1.26198	1.20733	0.953079	0.893979	0.834879	0.893979	1.35051	0.00252221
Q80YT7	Pde4dip	1.25524	1.13522	1.01519	1.13522	0.887554	0.848304	0.809054	0.848304	1.33822	0.0170262
Q91VE6	Nifk	1.28338	1.1601	1.03683	1.1601	0.831785	0.867249	0.902712	0.867249	1.33768	0.0167582
Q8BGW1	Fto	1.16971	1.06346	1.11658	1.11658	0.759729	0.911342	0.835535	0.835535	1.33637	0.00626006
Q8BH86	Dglucy	1.1498	1.11746	1.18215	1.1498	0.862078	0.890287	0.833868	0.862078	1.33376	0.000314354
Q9D3H2	Obp1a	1.26346	1.16054	1.05762	1.16054	0.853811	0.871097	0.888383	0.871097	1.33227	0.00862429
Q8R143	Pttg1ip	1.08083	1.07026	1.07555	1.07555	0.795298	0.833781	0.814539	0.814539	1.32044	2.24773e-05
Q6VN19	Ranbp10	1.25856	1.23198	1.2054	1.23198	0.92133	0.933034	0.944738	0.933034	1.3204	5.81412e-05
Q9D709	Tmem79	1.15592	1.1013	1.04668	1.1013	0.835334	0.843675	0.852016	0.843675	1.30536	0.0012772
Q9CY52	Thg1l	1.20949	1.19162	1.17374	1.19162	0.92738	0.915442	0.903503	0.915442	1.30169	2.41446e-05
Q9D1G0	Dnase1l2	1.13146	1.25806	1.00486	1.13146	0.876916	0.784514	0.969317	0.876916	1.29027	0.0481746
Q9DD18	Dtd1	1.0854	1.32008	1.178	1.19449	0.980698	0.834401	0.973642	0.92958	1.28498	0.0334387
O08911	Mapk12	1.14234	1.07716	1.01198	1.07716	0.806953	0.840497	0.874041	0.840497	1.28158	0.00501832
Q62264	Thrsp	1.25905	1.23973	1.24939	1.24939	0.838364	1.12243	0.980395	0.980395	1.27437	0.0307098
Q70KF4	Cmya5	1.19115	1.13747	1.08379	1.13747	0.880446	0.894317	0.908188	0.894317	1.27189	0.0016115
Q8CEC6	Ppwd1	1.23569	1.12391	1.07785	1.14582	0.874138	0.937619	0.891801	0.901186	1.27145	0.00839566
Q80VJ3	Dnph1	1.1686	1.11348	1.16764	1.14991	0.923514	0.958938	0.836678	0.906377	1.26869	0.00389738
Q9R1Q7	Plp2	1.20283	1.09498	1.12431	1.14071	0.798781	0.878367	1.02024	0.899129	1.26868	0.0288336
Q9CW46	Raver1	1.22045	1.12708	1.0337	1.12708	0.871362	0.889556	0.907749	0.889556	1.26701	0.0124022
Q9QXG4	Acss2	1.12535	1.14996	1.13368	1.13633	0.915575	0.861561	0.92609	0.901075	1.26108	0.000378992
Q9DC63	Fbxo3	1.1332	1.10764	1.08207	1.10764	0.932481	0.879142	0.825804	0.879142	1.2599	0.00259491
Q9CVD2	Atxn3	1.27115	1.15498	1.03882	1.15498	0.947879	0.918607	0.889335	0.918607	1.25732	0.0268396
Q9JMC3	Dnaja4	1.23003	1.05575	0.993591	1.09312	0.833579	0.90846	0.872891	0.871643	1.25409	0.0402122
Q9CXJ4	Abcb8	1.18823	1.16798	1.14774	1.16798	0.905148	0.931882	0.958617	0.931882	1.25336	0.00025959
Q9D7P6	Iscu	1.12532	1.08378	1.04223	1.08378	0.868871	0.865359	0.861847	0.865359	1.2524	0.000817779
Q8BWF0	Aldh5a1	1.1215	1.22202	1.15112	1.16488	0.944761	0.890347	0.960014	0.931707	1.25026	0.00309969
Q99JH1	Rpp25l	1.16394	1.0397	1.10182	1.10182	0.87105	0.892	0.881525	0.881525	1.2499	0.00375046
Q9Z2V4	Pck1	1.11907	1.07414	1.164	1.11907	0.900471	0.987459	0.813483	0.900471	1.24276	0.0180357
Q61704	Itih3	1.18855	1.18822	1.22423	1.20033	0.90851	1.09447	0.897185	0.96672	1.24166	0.0229501
Q9Z108	Stau1	1.05978	1.14888	1.23799	1.14888	0.987848	0.925911	0.863974	0.925911	1.24081	0.0236111
Q99KX1	Mlf2	1.06345	1.16406	1.11376	1.11376	0.97463	0.820786	0.897708	0.897708	1.24067	0.015205
P97500	Myt1l	1.07396	1.01984	1.12807	1.07396	0.866317	0.942979	0.789656	0.866317	1.23968	0.0185769
Q99PR8	Hspb2	1.20537	1.14908	1.09279	1.14908	0.893468	0.927923	0.962379	0.927923	1.23834	0.00438374
Q64008	Rab34	1.16243	1.13482	1.1072	1.13482	0.890918	0.917942	0.944966	0.917942	1.23626	0.000626728
Q91W53	Golga7	1.07897	1.18307	1.13102	1.13102	0.943713	0.887638	0.915675	0.915675	1.23517	0.00322717
P0DJE0	Pet100	1.114	1.12524	1.1894	1.14288	0.984566	0.952642	0.842702	0.926637	1.23337	0.0115455
F8VPU2	Farp1	1.21607	1.20014	1.18421	1.20014	1.02047	0.973995	0.927515	0.973995	1.23218	0.00134171
Q811U4	Mfn1	1.08394	1.11293	1.14193	1.11293	0.944274	0.903922	0.863571	0.903922	1.23123	0.00188593
Q920Q4	Vps16	1.13408	1.10252	1.1183	1.1183	0.836328	0.980922	0.908625	0.908625	1.23076	0.00799938
Q9WTK5	Nfkb2	1.11275	1.09847	1.0842	1.09847	0.852268	0.893017	0.933765	0.893017	1.23007	0.00118187
Q9R045	Angptl2	1.08876	1.10016	1.11157	1.10016	0.987266	0.897359	0.807452	0.897359	1.226	0.0179036
P49290	Epx	1.30996	1.18031	1.08124	1.1905	1.01046	1.00524	0.901293	0.972328	1.22439	0.0439917
Q8K3K7	Agpat2	1.12326	1.12389	1.12452	1.12389	0.957256	0.919911	0.882565	0.919911	1.22174	0.000696776
Q99JR5	Tinagl1	1.0534	1.10867	1.21334	1.12514	0.970215	0.962039	0.832738	0.921664	1.22077	0.0346349
Q02566	Myh6	1.18725	1.06255	1.1249	1.1249	0.830624	1.01306	0.921841	0.921841	1.22028	0.0334322
Q8R5A0	Smyd2	1.08973	1.16823	1.01123	1.08973	0.895588	0.893359	0.897816	0.895588	1.21678	0.0128307
Q91Z58		1.16234	1.11221	1.06208	1.11221	0.988739	0.916844	0.844948	0.916844	1.21309	0.018134
Q69ZR2	Hectd1	1.18103	1.05096	1.16728	1.13309	0.92918	0.962178	0.917338	0.936232	1.21027	0.0105161
Q78HU7	Gypc	1.10128	1.0773	1.05331	1.0773	0.959629	0.892485	0.82534	0.892485	1.20707	0.0109095
O88986	Gcat	1.14061	1.00873	1.11282	1.08739	0.90491	0.962104	0.838998	0.902004	1.20552	0.025896
Q9Z2G9	Htatip2	1.14231	1.10048	1.0988	1.11386	0.833618	0.906404	1.03272	0.924248	1.20515	0.0339722
Q60714	Slc27a1	1.1831	1.04482	1.10636	1.11143	0.925864	0.977324	0.866049	0.923079	1.20405	0.0213878
Q80VI1	Trim56	1.04847	1.09576	1.07212	1.07212	0.986284	0.795189	0.890736	0.890736	1.20363	0.0331607
P82348	Sgcg	1.11176	1.03851	0.965251	1.03851	0.882091	0.865193	0.848295	0.865193	1.20032	0.0162249
Q5U405	Tmprss13	0.832134	0.889344	0.770357	0.830612	1.02892	0.992713	0.976188	0.999274	0.831215	0.0110642
P55065	Pltp	0.905513	0.913038	0.924957	0.914503	1.16376	1.04309	1.10796	1.10493	0.827653	0.00572586
Q9WVP1	Ap1m2	0.907404	0.87363	0.890517	0.890517	1.03627	1.14152	1.0889	1.0889	0.817816	0.00340745
Q8BGT6	Micall1	0.842633	0.909891	0.977149	0.909891	1.26499	1.13968	1.01437	1.13968	0.798375	0.0488857
Q9CWF2	Tubb2b	0.705426	0.92264	0.814033	0.814033	0.973778	1.07489	1.02433	1.02433	0.794695	0.0383807
Q8BLX7	Col16a1	0.909911	0.853158	0.881535	0.881535	1.06127	1.22168	1.14148	1.14148	0.772276	0.00612038
P60840	Ensa	1.03457	0.905595	0.7406	0.893589	1.11346	1.16699	1.20307	1.16117	0.769558	0.039642
Q9Z2C5	Mtm1	0.752037	0.877624	0.81702	0.815561	1.05583	0.98973	1.20996	1.08517	0.751548	0.022519
P18524		0.951257	0.892164	0.873626	0.905682	1.27101	1.12914	1.24995	1.2167	0.744376	0.0034042
Q00623	Apoa1	0.710168	0.882766	0.944939	0.845958	1.19749	1.15582	1.07524	1.14285	0.740219	0.0196954
P01648		0.900819	0.796454	0.848637	0.848637	1.12425	1.20034	1.16229	1.16229	0.73014	0.00109296
P34928	Apoc1	0.77786	0.832472	0.829437	0.813256	1.14289	1.12783	1.11804	1.12959	0.719958	7.84357e-05
Q9D0S9	Hint2	0.721012	0.83321	0.777111	0.777111	1.10211	1.15088	1.1265	1.1265	0.689847	0.000585886
P06327	Gm5629	0.96258	0.71898	0.884708	0.855423	1.44967	1.27948	1.25108	1.32675	0.644753	0.00766811
Q6ZWY8	Tmsb10	0.651457	0.911742	0.883219	0.815473	1.39621	1.38234	1.20209	1.32688	0.614578	0.00779748
P11589	Mup2	0.700571	0.67878	0.722363	0.700571	1.38833	1.44523	1.33143	1.38833	0.504615	4.03598e-05

## Sheet: UF vs NF
Accession	Gene Name	AF-1/REF	AF-2/REF	AF-3/REF	average AF	NF-1/REF	NF-2/REF	NF-3/REF	average NF	AF/NF	t test p value
P97347	Rptn	1.80499	1.76873	1.17708	1.5836	0.727854	0.366328	0.570926	0.555036	2.85315	0.0108707
Q80XI6	Map3k11	1.29347	1.55336	1.03358	1.29347	0.47002	0.457804	0.482236	0.47002	2.75195	0.00539198
P35175	Stfa1	1.37539	1.61062	1.07814	1.35472	0.764329	0.495185	0.594347	0.617954	2.19226	0.013053
P35173	Stfa3	1.37641	1.31947	1.16307	1.28632	0.694799	0.555269	0.579865	0.609978	2.10879	0.000922876
Q00547	Hmmr	1.80759	1.90306	1.71212	1.80759	0.914792	0.874916	0.954669	0.914792	1.97596	0.000116731
P39654	Alox15	1.53834	1.45035	1.6041	1.53093	0.771767	0.850374	0.845513	0.822551	1.8612	0.000159268
Q9Z2K1	Krt16	1.0761	1.64639	1.14343	1.28864	0.829455	0.586291	0.698094	0.704613	1.82886	0.0390291
Q6PCQ0	Iqce	1.49566	1.15052	1.23429	1.29349	0.564542	0.732328	0.96144	0.75277	1.71831	0.0251722
Q61878	Prg2	1.66494	1.4271	1.21281	1.43495	0.777864	0.874301	0.860882	0.837683	1.713	0.011189
Q99NB5	Gsdmc	1.32808	1.44803	1.09294	1.28969	0.818053	0.643256	0.83378	0.76503	1.6858	0.0122382
Q62264	Thrsp	1.25905	1.23973	1.24939	1.24939	0.731269	0.801066	0.766168	0.766168	1.6307	2.07623e-05
O08692	Ngp	1.01223	1.39299	1.12023	1.17515	0.936368	0.657509	0.652037	0.748638	1.56972	0.0441727
P70402	Mybph	1.47139	0.972379	1.31907	1.25428	0.73324	0.88034	0.81381	0.80913	1.55016	0.0442455
Q91Z98	Chil4	1.44545	1.43346	1.43945	1.43945	0.977346	0.897005	0.937175	0.937175	1.53595	2.80938e-05
Q62267	Sprr1b	1.20144	1.24937	1.03905	1.16328	0.782961	0.712821	0.827195	0.774326	1.50232	0.0056346
Q8C138	Adtrp	1.26396	1.33742	1.1905	1.26396	0.841544	0.871282	0.811807	0.841544	1.50195	0.000765157
P51437	Camp	1.05296	1.29392	1.12342	1.15676	0.934708	0.728756	0.678667	0.78071	1.48168	0.0239107
P50172	Hsd11b1	1.24881	1.16839	1.2086	1.2086	0.816169	0.818924	0.817546	0.817546	1.47833	7.30002e-05
O70373	Xirp1	1.48851	1.30136	1.11421	1.30136	0.790598	0.882012	0.973427	0.882012	1.47544	0.0251868
Q8K443	Rgs13	1.32249	0.98278	1.15264	1.15264	0.748779	0.829195	0.788987	0.788987	1.46091	0.0225873
P27005	S100a8	0.893255	1.27654	1.03306	1.06762	0.793976	0.734624	0.671357	0.733319	1.45587	0.046568
P55088	Aqp4	1.346	1.22024	1.28312	1.28312	0.941946	0.820822	0.881384	0.881384	1.4558	0.00134261
Q9CQV3	Serpinb11	1.24362	1.17212	1.12242	1.17939	0.844468	0.762341	0.861928	0.822912	1.43319	0.00158038
Q3UHZ5	Lmod2	1.40264	1.23185	1.06106	1.23185	0.758855	0.865402	0.97195	0.865402	1.42344	0.0344122
Q08652	Rbp2	1.16814	1.18884	1.14745	1.16814	0.823129	0.916144	0.730115	0.823129	1.41915	0.00329982
Q9CR41	Hypk	1.36007	1.24954	1.16886	1.25949	0.910327	0.876624	0.90297	0.896641	1.40468	0.00299404
Q6VN19	Ranbp10	1.25856	1.23198	1.2054	1.23198	0.853841	0.878742	0.903643	0.878742	1.40198	7.3588e-05
Q9D1C9	Rrp7a	1.15267	1.20733	1.26198	1.20733	0.845805	0.866869	0.887933	0.866869	1.39274	0.000547496
Q9D6H2	Hspb11	1.11216	1.24553	1.3789	1.24553	0.937006	0.897095	0.857184	0.897095	1.3884	0.0123002
Q8BFZ3	Actbl2	1.13439	1.12728	1.39978	1.22048	0.955698	0.878768	0.815983	0.883483	1.38144	0.0266218
P28293	Ctsg	1.1728	1.29441	1.05119	1.1728	0.85034	0.753645	0.947035	0.85034	1.37921	0.0228643
F8VPU2	Farp1	1.21607	1.20014	1.18421	1.20014	0.883542	0.877046	0.87055	0.877046	1.36839	5.32486e-06
Q9QXY9	Pex3	1.25408	1.40506	1.14016	1.26643	0.896682	0.950478	0.948304	0.931821	1.35909	0.0131445
Q9D1F4	Akt1s1	1.13982	1.21248	1.36583	1.23937	0.908321	0.942733	0.887722	0.912925	1.35759	0.00887713
Q9WTK5	Nfkb2	1.11275	1.09847	1.0842	1.09847	0.793558	0.810088	0.826618	0.810088	1.35599	2.16581e-05
P08071	Ltf	1.06533	1.29281	1.04233	1.13349	0.938897	0.739417	0.830553	0.836289	1.35538	0.0393413
Q5XKE0	Mybpc2	1.10273	1.09767	1.36746	1.18928	0.806074	0.87002	0.966854	0.880983	1.34995	0.0375016
O35744	Chil3	1.03022	1.2696	1.06009	1.11997	0.90152	0.779828	0.817844	0.833064	1.3444	0.0263382
Q9R1Q7	Plp2	1.20283	1.09498	1.12431	1.14071	0.936964	0.886211	0.730599	0.851258	1.34003	0.0143898
Q9CY52	Thg1l	1.20949	1.19162	1.17374	1.19162	0.901152	0.891846	0.882539	0.891846	1.33612	1.34845e-05
Q3V188	Endou	1.13843	1.10526	1.0183	1.08733	0.845706	0.792884	0.804922	0.814504	1.33496	0.00224518
Q06180	Ptpn2	1.05556	1.06658	1.0776	1.06658	0.927511	0.802191	0.676872	0.802191	1.32958	0.0219639
Q9DCN1	Nudt12	1.19286	1.30778	1.25032	1.25032	0.86046	1.02735	0.943907	0.943907	1.32462	0.00634786
A2AQP0	Myh7b	1.12964	1.20826	1.28687	1.20826	0.979233	0.918019	0.856805	0.918019	1.31616	0.00725414
Q80YA3	Ddhd1	1.08532	1.10206	1.06859	1.08532	0.828644	0.932601	0.724687	0.828644	1.30976	0.0134532
Q8BHI7	Elovl5	1.18452	1.25168	1.12303	1.18641	0.982418	0.875838	0.860424	0.906227	1.30918	0.0063092
Q8VBT6	Apobr	1.19866	1.12539	1.04235	1.12213	0.927674	0.813948	0.830762	0.857461	1.30867	0.00994758
Q9DD18	Dtd1	1.0854	1.32008	1.178	1.19449	0.930453	0.893714	0.930062	0.918076	1.30108	0.0163034
P12791	Cyp2b10	1.0572	1.18308	1.12014	1.12014	0.951963	0.772435	0.862199	0.862199	1.29917	0.0151574
Q9Z108	Stau1	1.05978	1.14888	1.23799	1.14888	0.953894	0.884425	0.814955	0.884425	1.29902	0.0154242
Q61704	Itih3	1.18855	1.18822	1.22423	1.20033	1.024	0.836901	0.911832	0.924244	1.29872	0.0077058
Q9WTX8	Mad1l1	1.10308	1.10952	1.11597	1.10952	0.875848	0.857675	0.839503	0.857675	1.29364	2.26068e-05
Q8BGK2	Adprhl1	1.05492	1.16831	1.28171	1.16831	0.952108	0.905909	0.859709	0.905909	1.28966	0.0206208
Q4FZF3	Ddx49	1.04576	1.14943	1.09822	1.0978	0.887872	0.907788	0.768268	0.854643	1.28452	0.0100289
Q9CVD2	Atxn3	1.27115	1.15498	1.03882	1.15498	0.800568	0.899362	0.998157	0.899362	1.28422	0.0439698
Q9CRB3	Urah	1.08631	1.13585	1.06809	1.09675	0.945267	0.839015	0.77869	0.854324	1.28377	0.0100512
Q91YD3	Dcp1a	1.22083	1.10379	1.33788	1.22083	0.953357	0.949294	0.957419	0.953357	1.28056	0.0167374
Q9D3H2	Obp1a	1.26346	1.16054	1.05762	1.16054	0.874961	0.909048	0.943136	0.909048	1.27665	0.015894
Q9CXJ4	Abcb8	1.18823	1.16798	1.14774	1.16798	0.912059	0.917086	0.922114	0.917086	1.27358	3.13704e-05
P11247	Mpo	1.02386	1.12681	1.02169	1.05746	0.906413	0.793709	0.791142	0.830421	1.2734	0.0115768
Q91Z58		1.16234	1.11221	1.06208	1.11221	0.815748	0.876441	0.937134	0.876441	1.26901	0.00657132
O54909	Rdh16	1.18381	1.1425	1.16315	1.16315	0.955477	0.88509	0.920284	0.920284	1.26391	0.000499451
P49290	Epx	1.30996	1.18031	1.08124	1.1905	0.936719	0.91364	0.977737	0.942699	1.26287	0.0227443
Q03173	Enah	1.09047	1.11708	1.10378	1.10378	0.841597	0.907178	0.874387	0.874387	1.26234	0.000358401
Q61216	Mre11	1.04482	1.1983	1.12156	1.12156	0.974482	0.806881	0.890681	0.890681	1.25922	0.024464
Q9JM83	Calm4	1.16185	1.15322	0.952636	1.08923	0.92636	0.87162	0.799524	0.865835	1.25802	0.0450454
Q8BG17	Nol12	1.13664	1.08783	1.03901	1.08783	0.81196	0.867128	0.922295	0.867128	1.25452	0.00656447
Q9Z2G9	Htatip2	1.14231	1.10048	1.0988	1.11386	0.849083	0.877498	0.946558	0.891047	1.25006	0.00230304
Q3TBT3	Tmem173	1.1447	1.1353	1.15411	1.1447	0.919	1.00401	0.833993	0.919	1.2456	0.0102534
Q8CE08	Acpp	1.13957	1.22533	1.03966	1.13485	0.912797	0.867307	0.95614	0.912081	1.24425	0.0200128
Q02566	Myh6	1.18725	1.06255	1.1249	1.1249	0.807119	1.00746	0.907287	0.907287	1.23985	0.0330709
Q920Q4	Vps16	1.13408	1.10252	1.1183	1.1183	0.87547	0.928814	0.902142	0.902142	1.23961	0.000269259
Q8CJ40	Crocc	1.09376	1.08239	1.07102	1.08239	0.888454	0.877541	0.866627	0.877541	1.23343	2.3044e-05
P06795	Abcb1b	1.00101	1.08578	1.17056	1.08578	0.938991	0.880921	0.82285	0.880921	1.23256	0.0259808
Q69ZR2	Hectd1	1.18103	1.05096	1.16728	1.13309	0.921961	0.920342	0.919789	0.920698	1.23069	0.0067567
O35309	Nmi	1.13518	1.20812	1.08986	1.14439	0.865928	0.989053	0.941345	0.932109	1.22774	0.0129477
Q9D2R6	Coa3	1.12987	1.32688	1.28178	1.24617	0.985861	1.01002	1.0618	1.01923	1.22267	0.0234847
P52019	Sqle	0.99618	1.11277	1.22937	1.11277	0.885454	0.910272	0.935089	0.910272	1.22246	0.0422908
O35465	Fkbp8	1.10347	1.09444	1.16178	1.1199	0.932821	0.891955	0.928385	0.91772	1.2203	0.00122411
Q9CR60	Golt1b	1.1254	1.05155	1.11065	1.09587	0.847233	0.924966	0.923673	0.898624	1.21949	0.00448544
Q70KF4	Cmya5	1.19115	1.13747	1.08379	1.13747	0.900575	0.932977	0.965378	0.932977	1.21919	0.00483743
P56212	Arpp19	1.13667	1.03686	1.02728	1.06694	0.76798	0.930963	0.927162	0.875369	1.21884	0.040377
Q9D824	Fip1l1	1.14318	1.0635	1.10334	1.10334	0.904147	0.911457	0.907802	0.907802	1.2154	0.00106701
Q8K284	Gtf3c1	1.09955	1.12586	1.07324	1.09955	0.90558	0.897679	0.913481	0.90558	1.21419	0.000256646
Q8CAK3	Ryden	1.09353	1.07737	1.0612	1.07737	0.870982	0.887763	0.904544	0.887763	1.21358	0.00014707
Q9D1P0	Mrpl13	1.19036	1.11411	1.03786	1.11411	0.884099	0.918427	0.952755	0.918427	1.21307	0.0154338
Q3TJZ6	Fam98a	1.09887	1.09542	1.09715	1.09715	0.882602	0.92827	0.905436	0.905436	1.21173	0.000131511
Q9EPM5	Sync	1.15735	1.09174	1.02612	1.09174	0.84408	0.901923	0.959766	0.901923	1.21045	0.0197989
P56371	Rab4a	0.985941	1.01275	1.03956	1.01275	0.78399	0.836984	0.889978	0.836984	1.21	0.00685703
Q8BWF0	Aldh5a1	1.1215	1.22202	1.15112	1.16488	0.987633	0.951244	0.949329	0.962735	1.20997	0.00333294
Q9D0I8	Mrto4	1.04071	1.18066	1.0829	1.10142	0.959331	0.88331	0.891453	0.911364	1.20854	0.0166204
Q9ERY9	Erg28	1.06371	1.15312	1.24254	1.15312	1.02397	0.954712	0.885451	0.954712	1.20782	0.0384593
Q810V0	Mphosph10	1.08384	1.06743	1.05103	1.06743	0.897413	0.884265	0.871118	0.884265	1.20714	0.000112367
Q8C0L6	Paox	1.10338	1.0529	1.13782	1.09803	0.909908	0.94456	0.877447	0.910638	1.20578	0.00394187
Q99PR8	Hspb2	1.20537	1.14908	1.09279	1.14908	0.910308	0.953486	0.996664	0.953486	1.20514	0.00880577
Q9DC63	Fbxo3	1.1332	1.10764	1.08207	1.10764	0.88735	0.919483	0.951617	0.919483	1.20463	0.00136452
Q9Z2A5	Ate1	1.14525	1.09907	1.05289	1.09907	0.911925	0.914205	0.916486	0.914205	1.20221	0.00228206
Q5SSI6	Utp18	1.08655	1.0858	1.19921	1.12386	0.861081	0.991644	0.95579	0.936172	1.20048	0.0257362
P08207	S100a10	0.972252	0.884225	0.90497	0.920482	1.09465	1.1603	1.05918	1.10471	0.833233	0.00980738
Q5TIS6	Noto	0.933647	0.949913	0.917381	0.933647	1.12104	1.10544	1.13665	1.12104	0.832839	0.000135184
Q9DAW9	Cnn3	0.893512	0.905967	0.899739	0.899739	1.02337	1.13984	1.0816	1.0816	0.831857	0.00577402
Q8VBV7	Cops8	0.97803	0.829566	0.907288	0.904962	1.0153	1.10652	1.14537	1.08906	0.830955	0.0331196
Q9D281	Fam114a1	0.926862	0.899707	0.932566	0.919712	1.19739	1.07639	1.04803	1.10727	0.830614	0.0161489
P10605	Ctsb	0.844654	0.928552	0.930896	0.901367	1.1003	1.17976	0.98508	1.08838	0.828174	0.0416561
P47739	Aldh3a1	0.977838	0.885257	0.903841	0.922312	1.05968	1.17248	1.11281	1.11499	0.827195	0.0111062
P18242	Ctsd	0.852234	0.920735	0.920716	0.897895	1.11517	1.16896	0.973326	1.08582	0.826929	0.039974
O88508	Dnmt3a	0.942534	0.871409	0.890506	0.901483	1.01251	1.07664	1.18647	1.09187	0.825629	0.0258644
P24549	Aldh1a1	1.04155	0.893368	0.931454	0.955457	1.13166	1.23616	1.11675	1.16152	0.82259	0.0239749
Q9CR84	Atp5mc1	0.912251	0.873019	0.922508	0.902593	1.02453	1.19967	1.07439	1.09953	0.820889	0.0221348
P82349	Sgcb	0.90592	0.906641	0.905199	0.90592	1.11113	1.05047	1.1718	1.11113	0.815312	0.00423562
Q62000	Ogn	0.876449	0.858937	0.920094	0.88516	1.06485	1.02948	1.17204	1.08879	0.812977	0.0119337
Q8VEN2	Plet1	0.904273	0.863966	0.97617	0.914803	1.06798	1.24984	1.05998	1.12593	0.812485	0.0395555
Q8K385	FRRS1	0.847735	0.904091	0.922772	0.891533	1.07508	1.17703	1.04957	1.10056	0.810073	0.00969567
P14069	S100a6	0.849456	0.955517	0.917736	0.90757	1.16557	1.1443	1.05139	1.12042	0.810028	0.0104501
P28654	Dcn	0.846139	0.87046	0.880943	0.865847	1.03513	1.06076	1.12728	1.07439	0.805897	0.00206802
Q99JH8	Kdelr1	0.883398	0.912155	0.944797	0.91345	1.12326	1.15508	1.13417	1.1375	0.803029	0.000364561
P97494	Gclc	0.899931	0.923305	0.815122	0.879453	1.1534	1.04877	1.0916	1.09792	0.801014	0.00814714
E9Q4S1	Pde8b	1.0064	0.919134	0.845805	0.923779	1.20232	1.08793	1.19649	1.16225	0.79482	0.0160083
Q8C0L8	Cog5	0.906274	0.881931	0.857588	0.881931	1.05251	1.11036	1.16821	1.11036	0.794274	0.00323643
P63254	Crip1	0.875745	0.903784	0.906938	0.895489	1.20605	1.09691	1.12634	1.1431	0.783386	0.0019048
Q8BHC0	Lyve1	0.907459	0.88264	0.857821	0.88264	1.08918	1.13054	1.17189	1.13054	0.780726	0.000879823
Q3U962	Col5a2	0.886524	0.892445	0.866714	0.881894	1.08808	1.11513	1.18776	1.13032	0.780216	0.00127709
Q61414	Krt15	0.895059	0.828813	0.795658	0.839843	0.932909	1.09541	1.2026	1.07697	0.779818	0.0471419
P09803	Cdh1	0.859143	0.882116	0.920091	0.887116	1.07806	1.21714	1.12643	1.14054	0.777801	0.0046852
P63082	Atp6v0c	0.853106	0.909183	0.858049	0.873446	1.09165	1.21904	1.06828	1.12633	0.775483	0.00727422
Q9D695	Serpinb7	0.919598	0.866859	0.814121	0.866859	1.15166	1.12603	1.1004	1.12603	0.769836	0.00156451
Q9CXL3		0.996706	0.932239	1.06117	0.996706	1.30317	1.22204	1.38431	1.30317	0.76483	0.00687498
Q9R013	Ctsf	0.87555	0.875592	0.840798	0.86398	1.08004	1.14191	1.17049	1.13081	0.764035	0.000785574
Q8BK62	Olfml3	0.821481	0.80268	0.92214	0.848767	1.17049	0.981521	1.20018	1.1174	0.759594	0.0260649
O88207	Col5a1	0.821691	0.895796	0.87386	0.863782	1.15025	1.10124	1.17087	1.14079	0.75718	0.000780072
Q3TTY5	Krt2	0.858418	0.922833	0.857183	0.879478	1.22488	1.06101	1.22576	1.17055	0.751338	0.00780851
Q64314	Cd34	0.904542	0.799221	0.895315	0.866359	1.11064	1.14685	1.21792	1.15847	0.747846	0.00318022
Q5U405	Tmprss13	0.832134	0.889344	0.770357	0.830612	1.07199	1.15815	1.10982	1.11332	0.746067	0.00264093
Q9DC71	Mrps15	0.983296	0.964248	0.973772	0.973772	1.27674	1.34295	1.30985	1.30985	0.743423	7.19153e-05
Q00897	Serpina1d	0.784599	0.760919	0.772759	0.772759	1.0359	1.04421	1.04005	1.04005	0.743001	3.22202e-06
P07146	Prss2	0.890327	0.842626	0.778649	0.837201	1.07934	1.2164	1.13926	1.145	0.731177	0.00385187
Q9Z2C5	Mtm1	0.752037	0.877624	0.81702	0.815561	1.14294	1.18181	1.02996	1.11824	0.729326	0.00651978
P60202	Plp1	0.763241	0.78019	0.79714	0.78019	1.1181	1.07275	1.02741	1.07275	0.727279	0.000470795
P08121	Col3a1	0.777208	0.909787	0.860326	0.849107	1.3026	0.97848	1.26748	1.18285	0.717847	0.0383471
Q9Z0L8	Ggh	0.770762	0.873664	1.04374	0.896057	1.30628	1.12808	1.31129	1.24855	0.717679	0.0242086
Q8CGN8	Sprr4	0.907946	0.900728	0.904337	0.904337	1.17564	1.36504	1.27034	1.27034	0.711885	0.00259757
Q9R0M3	Srpx	0.858962	0.787964	0.816934	0.821287	1.0874	1.08103	1.29794	1.15546	0.71079	0.010785
Q60596	Xrcc1	0.879211	0.812228	0.845719	0.845719	1.09399	1.30277	1.19838	1.19838	0.705717	0.00508486
P02088	Hbb-b1	1.05242	0.805002	0.764079	0.873833	1.0652	1.4268	1.38574	1.29258	0.676039	0.0451314
Q9CXD9	Lrrc17	0.746795	0.908854	0.773605	0.809752	1.30848	1.02992	1.26514	1.20118	0.67413	0.017342
Q9D0S9	Hint2	0.721012	0.83321	0.777111	0.777111	1.2508	1.09627	1.17353	1.17353	0.662198	0.00198136
Q9CWF2	Tubb2b	0.705426	0.92264	0.814033	0.814033	1.43153	1.04864	1.24009	1.24009	0.656433	0.028498
Q01149	Col1a2	0.77008	0.794359	0.803896	0.789445	1.23425	1.07428	1.3846	1.23104	0.641282	0.00805557
P70290	Mpp1	0.910343	0.727403	0.818873	0.818873	1.0774	1.53153	1.30446	1.30446	0.627747	0.0263964
P11087	Col1a1	0.747199	0.8004	0.781636	0.776412	1.27352	1.06955	1.42563	1.25623	0.618048	0.010036
Q80YT5	Spata20	0.666177	0.84167	0.752321	0.753389	1.5013	1.01013	1.46917	1.32687	0.567796	0.0262078
Q3U108	Arid5a	0.916701	0.835978	0.755256	0.835978	1.19665	1.53334	1.87003	1.53334	0.545202	0.025155
Q30D77	Col24a1	0.876985	0.717471	0.713307	0.769255	1.28726	1.2993	1.72984	1.4388	0.534651	0.0125092
P28481	Col2a1	0.566972	0.759948	0.703599	0.67684	1.41732	1.09646	1.5481	1.35396	0.499896	0.00972478
P02463	Col4a1	0.6818	0.663204	0.683365	0.676123	1.30095	1.12656	1.63963	1.35572	0.49872	0.0107584
Q99J45	Nrbp1	0.72484	0.75107	0.777301	0.75107	1.42564	1.50834	1.59103	1.50834	0.497946	0.000111568
Q2VIS4	Flg2	0.729087	0.555405	0.449081	0.577858	1.17862	1.6622	1.59861	1.47981	0.390494	0.00635834
Q6IFZ6	Krt77	0.530172	0.523753	0.476534	0.510153	1.32712	2.03834	1.84623	1.73723	0.293659	0.00451145

## Sheet: UC vs NC
Accession	Gene Name	AC-1/REF	AC-2/REF	AC-3/REF	average AC	NAC-1/REF	NC-2/REF	NC-3/REF	average NC	AC/NC	t test p value
Q80XI6	Map3k11	1.57693	1.29444	1.85943	1.57693	0.534046	0.643226	0.424867	0.534046	2.9528	0.00396847
P97347	Rptn	0.948785	1.28962	1.62462	1.28768	0.472037	0.473503	0.503377	0.482972	2.66615	0.0146249
P35175	Stfa1	1.10782	1.25907	1.65001	1.33897	0.730973	0.669563	0.557593	0.65271	2.0514	0.0154374
P35173	Stfa3	1.26736	1.22063	1.54451	1.34417	0.612711	0.844867	0.601199	0.686259	1.95869	0.00688972
Q62267	Sprr1b	1.22216	1.258	1.32957	1.26991	0.801296	0.727845	0.768588	0.76591	1.65804	0.000187832
Q99NB5	Gsdmc	1.02385	1.12458	1.33586	1.16143	0.814031	0.763868	0.655948	0.744615	1.55977	0.0155617
Q08652	Rbp2	1.19917	1.05331	1.34502	1.19917	0.775169	0.84859	0.701749	0.775169	1.54697	0.0108443
P11589	Mup2	1.38833	1.44523	1.33143	1.38833	0.91281	1.04604	0.779581	0.91281	1.52094	0.00472618
Q62293	Tgtp1	1.09492	1.2461	1.17051	1.17051	0.924941	0.734945	0.829943	0.829943	1.41035	0.00828601
Q6ZWY8	Tmsb10	1.39621	1.38234	1.20209	1.32688	1.00205	0.889949	0.938928	0.943642	1.40613	0.00554089
P06327	Gm5629	1.44967	1.27948	1.25108	1.32675	0.867303	1.17159	0.970117	1.003	1.32277	0.0408846
O54909	Rdh16	1.05591	1.15094	1.10342	1.10342	0.803691	0.87348	0.838585	0.838585	1.31581	0.00147087
Q61555	Fbn2	1.13678	1.24887	1.02469	1.13678	0.866776	0.793595	0.939958	0.866776	1.31151	0.0250413
Q61955	Klk8	1.02673	1.16184	1.24115	1.14324	0.841478	0.921257	0.880484	0.881073	1.29756	0.0170906
Q9CYL5	Glipr2	1.16898	1.15738	1.14579	1.15738	0.857072	0.901579	0.946085	0.901579	1.28373	0.000649301
P62965	Crabp1	1.0584	1.04988	1.11757	1.07528	0.755355	0.892053	0.87354	0.840316	1.27962	0.00796262
P01668		1.10746	1.33189	1.21968	1.21968	0.961084	0.952835	0.956959	0.956959	1.27453	0.0154445
Q7TQA3	Sdr16c5	1.0105	1.18558	1.12601	1.10737	0.885648	0.819979	0.908814	0.87148	1.27067	0.0151482
P12791	Cyp2b10	1.06922	1.17879	1.12401	1.12401	0.945681	0.824496	0.885088	0.885088	1.26994	0.00715158
Q9D6J1	Cers4	1.05409	1.07377	1.22982	1.11923	0.908026	0.873932	0.863295	0.881751	1.26932	0.0142428
Q3V188	Endou	1.09604	1.14282	1.25658	1.16515	0.908737	0.956023	0.895249	0.920003	1.26646	0.00866943
P42225	Stat1	1.11403	1.04477	1.08232	1.08037	0.88295	0.847031	0.833904	0.854629	1.26414	0.000809401
Q8BHI7	Elovl5	0.956545	1.08681	1.13955	1.06097	0.883816	0.793835	0.854376	0.844009	1.25706	0.0230334
Q6ZQH8	Nup188	1.05676	1.11572	1.17467	1.11572	0.876289	0.888758	0.901226	0.888758	1.25537	0.00285178
Q9D7X8	Ggct	1.08298	1.04637	1.22654	1.11863	0.92606	0.863879	0.896138	0.895359	1.24936	0.0181425
Q9CYH2	Prxl2a	1.0153	1.07954	1.11189	1.06891	0.850823	0.833116	0.886208	0.856715	1.24768	0.00280785
P18524		1.27101	1.12914	1.24995	1.2167	0.969078	1.01046	0.960176	0.979905	1.24165	0.00720148
Q7TNT2	Far2	1.06412	1.04417	1.10086	1.06972	0.841028	0.858822	0.904134	0.867994	1.2324	0.00129515
Q91VS7	Mgst1	1.05609	1.09339	1.09203	1.0805	0.841335	0.907268	0.894898	0.881167	1.22622	0.00108206
P29758	Oat	1.08351	1.1931	1.1256	1.13407	0.966267	0.932573	0.876888	0.925242	1.2257	0.00714014
Q9Z0E6	Gbp2	1.07041	1.08962	1.04094	1.06699	0.845914	0.871371	0.898449	0.871911	1.22374	0.000713005
Q8BLX7	Col16a1	1.06127	1.22168	1.14148	1.14148	0.985728	0.881077	0.933403	0.933403	1.22292	0.0197188
Q09PK2	Asprv1	1.09561	1.06555	1.14219	1.10112	0.894141	0.95322	0.865261	0.904207	1.21777	0.00449659
Q9D7I5	Lhpp	1.05102	1.15017	1.08145	1.09422	0.868247	0.9021	0.926691	0.899013	1.21713	0.00449532
P53798	Fdft1	1.09511	1.0354	1.1042	1.07824	0.807956	0.91243	0.942347	0.887577	1.21481	0.0144241
P56567	Csta	1.0225	1.04321	1.21175	1.09249	0.937672	0.894914	0.875243	0.90261	1.21036	0.0388407
Q8R016	Blmh	1.05466	1.1196	1.1162	1.09682	0.965299	0.87535	0.881702	0.90745	1.20868	0.00616189
Q9D0S9	Hint2	1.10211	1.15088	1.1265	1.1265	0.944296	0.931696	0.937996	0.937996	1.20096	0.000204304
Q5EBG6	Hspb6	0.798996	0.970001	0.885072	0.884689	1.05566	1.07535	1.06361	1.06487	0.830793	0.0222429
Q6PIC6	Atp1a3	0.949195	0.884277	0.872555	0.902009	1.06124	1.0351	1.18169	1.09267	0.825507	0.0202082
Q9JHS9	Cwc15	0.96021	0.898632	0.837054	0.898632	1.00159	1.08959	1.17759	1.08959	0.824744	0.0369549
Q5RKZ7	Mocs1	0.943835	0.924613	0.90539	0.924613	1.09458	1.12196	1.14935	1.12196	0.824103	0.000517223
Q8VEE1	Lmcd1	0.771641	0.915452	0.957452	0.881515	1.02885	1.12313	1.07123	1.07441	0.820467	0.036737
Q9R1Q7	Plp2	0.798781	0.878367	1.02024	0.899129	1.07341	1.11701	1.09747	1.09596	0.8204	0.0406128
P36423	Tbxas1	0.938166	0.955266	0.972367	0.955266	1.15997	1.16566	1.17136	1.16566	0.819505	3.53334e-05
Q7TMK6	Hook2	0.930076	0.906782	0.883489	0.906782	1.09185	1.10949	1.12712	1.10949	0.817299	0.000274833
P11798	Camk2a	0.903201	0.890366	0.877531	0.890366	1.03835	1.09273	1.14712	1.09273	0.814805	0.00329626
Q91Z58		0.988739	0.916844	0.844948	0.916844	1.029	1.12524	1.22147	1.12524	0.814802	0.039756
Q9D2N4	Dtna	0.894383	0.892734	0.891086	0.892734	1.13134	1.0971	1.06286	1.0971	0.813723	0.000496174
Q9JHQ0	Anxa9	1.00272	0.841918	0.883346	0.909328	1.03697	1.21446	1.10228	1.11791	0.813421	0.0421027
Q9R013	Ctsf	0.941527	0.895778	0.913752	0.917019	1.14202	1.12371	1.11864	1.12812	0.812872	0.000151163
P14602	Hspb1	0.811486	0.963889	0.862794	0.87939	1.0959	1.08554	1.08242	1.08795	0.808297	0.00973893
Q6E1M8	Awat2	0.931581	0.817955	0.827366	0.858967	1.02828	1.0467	1.11415	1.06304	0.808028	0.010374
P97500	Myt1l	0.866317	0.942979	0.789656	0.866317	1.07331	1.00982	1.1368	1.07331	0.807143	0.0227203
Q9QX15	Clca3a1	0.97187	0.908597	0.878396	0.919621	1.07129	1.12816	1.21996	1.1398	0.806825	0.0127455
Q8C0I1	Agps	0.793268	0.853602	0.976661	0.87451	1.17962	1.08979	1.00101	1.09014	0.8022	0.0446051
Q8K385	FRRS1	0.873174	0.909325	0.954862	0.912454	1.23451	1.04802	1.13081	1.13778	0.801959	0.0186841
Q8C138	Adtrp	0.851394	0.72593	0.976858	0.851394	1.06366	1.08508	1.04223	1.06366	0.800439	0.0446286
Q9D3H2	Obp1a	0.853811	0.871097	0.888383	0.871097	1.01605	1.09002	1.16398	1.09002	0.799159	0.00753301
Q9D695	Serpinb7	0.880138	0.907605	0.935072	0.907605	1.0883	1.14041	1.19253	1.14041	0.795855	0.00238437
Q9D7P6	Iscu	0.868871	0.865359	0.861847	0.865359	1.08646	1.09045	1.09444	1.09045	0.793579	2.06944e-07
Q9DC63	Fbxo3	0.932481	0.879142	0.825804	0.879142	1.02315	1.11647	1.2098	1.11647	0.787427	0.0187128
Q8BGW1	Fto	0.759729	0.911342	0.835535	0.835535	1.11914	1.01548	1.06731	1.06731	0.782842	0.0119539
Q9QUR7	Pin1	0.884448	0.986748	0.935598	0.935598	1.26585	1.145	1.20543	1.20543	0.776155	0.00412017
A2AQP0	Myh7b	0.885946	0.842889	0.799833	0.842889	1.05492	1.08926	1.12359	1.08926	0.773822	0.0014944
O88551	Cldn1	0.894223	0.803447	0.89728	0.864983	1.14694	1.06771	1.13939	1.11801	0.773679	0.00313975
Q9D8T4	Tvp23b	0.694356	0.764105	0.833853	0.764105	0.967833	0.987828	1.00782	0.987828	0.77352	0.00592316
O55042	Snca	0.959567	0.922455	0.885344	0.922455	1.17092	1.19728	1.22363	1.19728	0.770461	0.000472552
O88935	Syn1	0.799575	0.866954	0.934334	0.866954	1.10246	1.14072	1.17897	1.14072	0.760007	0.00361065
O70548	Tcap	0.756945	0.813697	0.87045	0.813697	1.0366	1.07316	1.10971	1.07316	0.758229	0.00264463
Q9D709	Tmem79	0.835334	0.843675	0.852016	0.843675	1.09993	1.1177	1.13546	1.1177	0.754833	1.73364e-05
P82348	Sgcg	0.882091	0.865193	0.848295	0.865193	1.09326	1.14638	1.1995	1.14638	0.754716	0.000945532
O08911	Mapk12	0.806953	0.840497	0.874041	0.840497	1.14887	1.1144	1.07993	1.1144	0.754215	0.000592792
Q9CR84	Atp5mc1	0.822681	0.838743	0.947461	0.869628	1.27946	1.1209	1.0774	1.15925	0.750162	0.0164536
Q61765	Krt31	1.04169	0.954012	0.866331	0.954012	1.35366	1.27393	1.19421	1.27393	0.748871	0.00947744
Q80YT7	Pde4dip	0.887554	0.848304	0.809054	0.848304	1.07172	1.13784	1.20396	1.13784	0.745542	0.00285414
O35054	Cldn4	0.845166	0.942521	0.867488	0.885058	1.32805	1.01596	1.22727	1.19043	0.743479	0.0341004
Q99JZ0	Sdcbp2	0.809054	0.950602	0.879828	0.879828	1.33097	1.04882	1.18989	1.18989	0.739418	0.0272122
Q8VEN2	Plet1	0.857277	0.77963	0.90211	0.846339	1.18839	1.13368	1.11982	1.1473	0.73768	0.00191107
Q8R143	Pttg1ip	0.795298	0.833781	0.814539	0.814539	1.17681	1.03882	1.10782	1.10782	0.735266	0.00208772
Q5SX40	Myh1	0.786206	0.862295	0.842868	0.830457	0.963244	1.2711	1.17464	1.13633	0.730826	0.030986
Q61414	Krt15	0.878189	0.963226	0.796083	0.879166	1.2554	1.11292	1.24272	1.20368	0.730397	0.00809211
Q9WTK5	Nfkb2	0.852268	0.893017	0.933765	0.893017	1.25379	1.22859	1.20339	1.22859	0.726862	0.000264887
P57096	Psca	0.914542	0.747969	0.79878	0.82043	1.1837	1.03783	1.18451	1.13535	0.722625	0.0104802
P09803	Cdh1	0.851116	0.809073	0.859351	0.839847	1.21723	1.12164	1.14814	1.16234	0.722549	0.000577054
Q9R160	Adam24	0.83041	0.82497	0.81953	0.82497	1.18937	1.17993	1.17048	1.17993	0.699169	5.91127e-07
Q91Z98	Chil4	0.546603	0.792941	0.669772	0.669772	1.1004	0.87209	0.986247	0.986247	0.679112	0.0309623
P46660	Ina	0.821055	0.835602	0.850149	0.835602	1.16942	1.23329	1.29715	1.23329	0.67754	0.000462331
Q99J45	Nrbp1	0.703771	0.72953	0.755289	0.72953	1.23311	1.0835	0.933899	1.0835	0.673306	0.0156207
Q00547	Hmmr	0.533417	0.469072	0.597762	0.533417	0.823343	0.831795	0.814891	0.823343	0.647868	0.00150251
P60202	Plp1	0.868731	0.855127	0.841522	0.855127	1.29319	1.35647	1.41974	1.35647	0.630408	0.000178519
Q2VIS4	Flg2	0.712305	0.64157	0.56371	0.639195	1.44096	1.25111	1.54433	1.41213	0.452646	0.00129153
Q6IFZ6	Krt77	0.666556	0.543471	0.421786	0.543938	1.53746	1.05079	1.35908	1.31578	0.413397	0.00826595

## Sheet: NF vs NC
Accession	Gene Name	NF-1/REF	NF-2/REF	NF-3/REF	average NF	NC-1/REF	NC-2/REF	NC-3/REF	average NC	NF/NC	t test p value
Q30D77	Col24a1	1.28726	1.2993	1.72984	1.4388	0.80546	0.799939	1.01265	0.872684	1.6487	0.024785
Q3U108	Arid5a	1.19665	1.53334	1.87003	1.53334	0.896872	0.93421	0.971549	0.93421	1.64132	0.0375362
Q9DC71	Mrps15	1.27674	1.34295	1.30985	1.30985	0.876898	0.916335	0.896616	0.896616	1.46088	4.94508e-05
Q99J45	Nrbp1	1.42564	1.50834	1.59103	1.50834	1.23311	1.0835	0.933899	1.0835	1.39209	0.0125991
Q3TTY5	Krt2	1.22488	1.06101	1.22576	1.17055	0.854388	0.839341	1.03807	0.910598	1.28547	0.0365989
Q8CGN8	Sprr4	1.17564	1.36504	1.27034	1.27034	1.05271	0.952222	1.00247	1.00247	1.26721	0.0123704
Q8CGP7	Hist1h2ak	1.07023	1.12961	1.189	1.12961	0.77677	0.900528	1.02429	0.900528	1.25439	0.0445353
Q9D0S9	Hint2	1.2508	1.09627	1.17353	1.17353	0.944296	0.931696	0.937996	0.937996	1.25111	0.00624354
Q9D8T4	Tvp23b	1.31455	1.23564	1.15674	1.23564	0.967833	0.987828	1.00782	0.987828	1.25087	0.00619934
Q8CGP6	Hist1h2ah	1.03989	1.18661	1.14804	1.12485	0.840057	0.942687	1.00476	0.929169	1.2106	0.0396704
Q9DB73	Cyb5r1	1.06612	1.15051	1.02927	1.08197	0.922046	0.823637	0.945396	0.897026	1.20617	0.0233202
Q9Z108	Stau1	0.953894	0.884425	0.814955	0.884425	1.00247	1.06236	1.12226	1.06236	0.832507	0.0283036
Q6P4S8	Ints1	0.882309	0.938458	0.82616	0.882309	1.06137	1.01735	1.1054	1.06137	0.831289	0.012188
Q9Z1W9	Stk39	0.898738	0.901359	0.900049	0.900049	1.14941	1.01898	1.08419	1.08419	0.830155	0.00810483
Q4FZF3	Ddx49	0.887872	0.907788	0.768268	0.854643	1.05284	1.01497	1.0356	1.03447	0.826164	0.0160891
Q5RKZ7	Mocs1	0.872192	0.925497	0.978802	0.925497	1.09458	1.12196	1.14935	1.12196	0.824892	0.00474702
Q9CR60	Golt1b	0.847233	0.924966	0.923673	0.898624	1.12116	1.03024	1.11741	1.0896	0.824725	0.00826283
Q9DC63	Fbxo3	0.88735	0.919483	0.951617	0.919483	1.02315	1.11647	1.2098	1.11647	0.823559	0.025895
Q9D1C9	Rrp7a	0.845805	0.866869	0.887933	0.866869	1.05171	1.05495	1.05818	1.05495	0.821719	0.000106829
P01820		0.802482	0.772057	0.954713	0.843084	1.01857	1.00083	1.06168	1.02703	0.820898	0.0361904
Q8CAK3	Ryden	0.870982	0.887763	0.904544	0.887763	1.10515	1.08514	1.06514	1.08514	0.818107	0.000196538
Q8CJ40	Crocc	0.888454	0.877541	0.866627	0.877541	1.04672	1.07492	1.10312	1.07492	0.816378	0.00034897
Q8C0E3	Trim47	0.945031	0.913585	0.88214	0.913585	1.11454	1.12143	1.12832	1.12143	0.814659	0.000363985
P02798	Mt2	0.904059	0.809498	0.856778	0.856778	1.04525	1.06252	1.05388	1.05388	0.812972	0.0020751
P01837	Igkc	0.801292	0.906061	0.927582	0.878311	1.02108	1.13394	1.11179	1.08894	0.806576	0.0155608
P18527		0.846989	0.816263	0.800137	0.82113	1.08458	1.04365	0.935316	1.02118	0.804097	0.0127174
Q8BG17	Nol12	0.81196	0.867128	0.922295	0.867128	1.06853	1.08162	1.09471	1.08162	0.801695	0.00280523
Q8C138	Adtrp	0.841544	0.871282	0.811807	0.841544	1.06366	1.08508	1.04223	1.06366	0.791179	0.000465798
P60202	Plp1	1.1181	1.07275	1.02741	1.07275	1.29319	1.35647	1.41974	1.35647	0.790844	0.003221
Q9QZH6	Ecsit	0.986372	0.944931	0.90349	0.944931	1.04965	1.20281	1.35597	1.20281	0.785602	0.0480682
Q91Z58		0.815748	0.876441	0.937134	0.876441	1.029	1.12524	1.22147	1.12524	0.778896	0.0193106
Q9R1Q7	Plp2	0.936964	0.886211	0.730599	0.851258	1.07341	1.11701	1.09747	1.09596	0.776721	0.0181053
P01635		0.872353	0.793489	0.922978	0.86294	1.17303	1.2135	0.967589	1.11804	0.771834	0.0398117
O55042	Snca	0.8826	0.914809	0.947017	0.914809	1.17092	1.19728	1.22363	1.19728	0.764075	0.000299559
Q8R555	Crtac1	0.875797	0.874771	0.876824	0.875797	1.14847	1.08123	1.21571	1.14847	0.762577	0.00216496
O89086	Rbm3	0.82578	0.865439	0.884091	0.858437	1.1456	1.05673	1.17797	1.12677	0.761858	0.00259759
P06330		0.673839	0.792507	0.920207	0.795517	0.934884	1.10297	1.11839	1.05208	0.756135	0.0497908
Q9QUR7	Pin1	0.944573	0.875383	0.909978	0.909978	1.26585	1.145	1.20543	1.20543	0.754901	0.00182519
P56371	Rab4a	0.78399	0.836984	0.889978	0.836984	1.18267	1.10964	1.0366	1.10964	0.754288	0.00636776
Q9R160	Adam24	0.691717	0.858845	1.02597	0.858845	1.18937	1.17993	1.17048	1.17993	0.727879	0.0293156
P60840	Ensa	0.808046	0.745979	0.829905	0.794644	1.02461	1.12786	1.22241	1.12496	0.706375	0.00611523
Q61765	Krt31	0.714189	0.852956	0.991722	0.852956	1.35366	1.27393	1.19421	1.27393	0.669545	0.0103695
Q9WTK5	Nfkb2	0.793558	0.810088	0.826618	0.810088	1.25379	1.22859	1.20339	1.22859	0.659363	1.77222e-05
P03987		0.53804	0.559773	0.581506	0.559773	1.03234	1.76422	2.4961	1.76422	0.317292	0.0464353
