# Supplementary material for: Proteomics and lipidomics reveal the protective mechanism of dietary n-3 PUFA supplementation for photoaging
Source: Royal Society of Chemistry journal article supplement (doi:10.1039/d0fo03228j), 2021-01-01
Supplement: d0fo03228j3.xlsx [file d0fo03228j3.xlsx]

## Sheet: UF vs UC
GO_ID	Term	Category	TestSeqs	RefSeqs	P value	richFactor
GO:0046459	short-chain fatty acid metabolish	P	Q9QXG4,Q9Z2V4,Q8BWF0	Q9QXG4,Q99NB1,Q8BH04,Q9Z2V4,Q8VCT4,Q07417,Q9D404,Q8BWF0	0.000286466	0.375
GO:0002215	defense response to nematode	P	P49290,Q61878	P49290,Q61878	0.000313534	1
GO:1903726	phospholipid metabolic process	P	P34928,Q60714	P34928,Q60714	0.000313534	1
GO:0045017	glycerolipid biosynthetic process	P	Q60714,P39654,Q8K3K7,Q00623,Q62264,Q9Z2V4	O70152,Q9D1Q4,Q99LV7,Q9WTK3,Q91YL7,Q3UUQ7,Q60714,P39654,Q922E4,Q8BGS7,Q61469,Q91ZV4,Q8K3K7,Q80UP3,Q9JK48,O88673,Q8BHF7,Q05816,Q00623,P09813,P49586,P16301,O55023,Q2TBE6,Q8VDP6,Q80WQ2,Q8CIH5,P70181,Q8BYI6,P01027,Q62264,Q8JZR0,P33622,Q9Z2A7,Q3UJ81,O70362,P35951,Q61586,Q61009,Q9D517,Q99L43,Q3UN02,Q8K4X7,Q8C0N2,Q14DK4,Q6PD26,Q9CXY9,P41216,P11152,Q9QUJ7,Q6PF93,Q8BTI9,Q8BH04,Q9Z2V4,Q922J9,P11404,O08529,…	0.000567627	0.101695
GO:0046486	glycerolipid metabolic process	P	P34928,Q60714,P39654,Q8BWF0,Q8K3K7,Q00623,Q62264,Q9Z2V4,Q9Z2C5	Q3UUQ7,O70152,Q9D1Q4,Q99LV7,Q9WTK3,Q91YL7,O70362,P31786,P08226,P11352,P24270,P49817,Q01339,P34928,P33622,Q08857,P13516,Q64516,P51637,P97742,Q9Z2G6,P35235,Q05421,Q91WG1,Q8VBT6,Q61586,Q60714,P39654,Q922E4,Q8BGS7,Q8CHP8,Q8VEB4,Q8BWF0,P98192,Q61469,Q91ZV4,Q8K3K7,Q80UP3,Q9JK48,O88673,Q8BHF7,Q05816,Q00623,P09813,P49586,P16301,Q9QZI9,Q8BHJ6,Q99LR1,Q9Z1Q2,O55023,Q2TBE6,Q8VDP6,Q80WQ2,Q8CIH5,P70181,Q8BYI6,…	0.000594709	0.0666667
GO:0032994	protein-lipid complex	C	Q00623,P34928,P55065,Q9QXY9	O08539,P08226,Q00623,P06728,Q01339,P34928,P33622,P09813,Q9CQF9,Q9BCZ4,Q8VBT6,P11152,P30204,P35951,Q60963,O88307,Q8VDJ3,P52430,P55065,O70362,P31532,P16301,Q06890,Q9QXY9	0.000759744	0.166667
GO:0034367	protein-containing complex remodeling	P	Q00623,P34928,P55065	Q00623,P09813,P34928,P11152,P08226,P06728,P16301,P11247,Q60963,P55065,Q61009	0.000811926	0.272727
GO:0034369	plasma lipoprotein particle remodeling	P	Q00623,P55065,P34928	Q00623,P09813,P11152,P08226,P06728,P16301,P11247,Q60963,P55065,Q61009,P34928	0.000811926	0.272727
GO:0034368	protein-lipid complex remodeling	P	Q00623,P34928,P55065	Q00623,P09813,P34928,P11152,P08226,P06728,P16301,P11247,Q60963,P55065,Q61009	0.000811926	0.272727
GO:0008535	respiratory chain assembly	P	Q9D2R6,P0DJE0	Q9D2R6,P0DJE0,Q8BGA9	0.000929685	0.666667
GO:0033617	mitochondrial respiratory chain assembly	P	Q9D2R6,P0DJE0	Q9D2R6,P0DJE0,Q8BGA9	0.000929685	0.666667
GO:0005549	odorant binding	F	P11589,Q9D3H2	P11589,B5X0G2,Q9D3H2	0.000929685	0.666667
GO:0006641	triglyceride metabolic process	P	Q62264,Q60714,Q00623,Q9Z2V4,P34928	P33622,P01027,Q62264,Q8JZR0,Q9Z2A7,Q60714,Q3UJ81,O70362,P35951,Q61586,Q61009,O88307,P06728,Q01339,Q99PG0,P41216,P11152,Q8C0N2,Q91ZV4,Q9QUJ7,Q14DK4,P08226,Q00623,O35678,P54310,Q8BH04,Q9Z2V4,Q7TMF5,Q8BHJ5,Q08857,P31786,P11352,P24270,P49817,P34928,P13516,Q64516,P51637,P97742,Q9Z2G6,P35235,Q05421,Q91WG1,Q8VBT6	0.00100364	0.113636
GO:0006650	glycerophospholipid metabolic process	P	Q60714,P39654,Q8K3K7,Q00623,P34928,Q9Z2C5,Q8BWF0	Q3UUQ7,O70152,Q9D1Q4,Q99LV7,Q9WTK3,Q91YL7,O70362,Q60714,P39654,Q922E4,Q8BGS7,Q8K3K7,Q80UP3,Q9JK48,O88673,Q8BHF7,Q05816,Q00623,P09813,P49586,P16301,Q9QZI9,Q8BHJ6,Q99LR1,Q9Z1Q2,O55023,Q2TBE6,Q8VDP6,Q80WQ2,Q8CIH5,P70181,Q8BYI6,P35951,Q61009,P34928,Q9D517,Q99L43,Q3UN02,Q8K4X7,Q8C0N2,Q61586,Q14DK4,Q6PD26,Q9CXY9,P51432,Q9Z2D6,Q99LY2,Q8VEB4,Q8BMS1,Q9CQJ0,Q6PF93,Q8BTI9,P31786,Q60963,P06728,P52430,Q922J9,…	0.00147428	0.0729167
GO:0034364	high-density lipoprotein particle	C	Q00623,P34928,P55065	P08226,Q00623,P33622,Q06890,P09813,P52430,P06728,Q01339,P34928,Q8VDJ3,P55065,O70362,P31532,P16301	0.00172313	0.214286
GO:0031649	heat generation	P	Q60714,P11589	P25085,Q60714,P61922,P11589	0.00183782	0.5
GO:0019541	propionate metabolic process	P	Q9QXG4,Q9Z2V4	Q9QXG4,Q99NB1,Q8BH04,Q9Z2V4	0.00183782	0.5
GO:0006083	acetate metabolic process	P	Q9QXG4,Q8BWF0	Q9QXG4,Q99NB1,Q8R3P0,Q8BWF0	0.00183782	0.5
GO:0006646	phosphatidylethanolamine biosynthesis	P	Q60714,P39654	Q60714,P39654,Q922E4,Q8BGS7	0.00183782	0.5
GO:0032374	regulation of cholesterol transport	P	Q00623,P55065,P34928	Q8BYY4,P08226,Q00623,Q60994,P52430,Q91ZX7,P55065,P41233,P06728,P09813,P34928,P32020,Q8CAY6,Q8K4M5,P07356	0.00212634	0.2
GO:0032982	myosin filament	C	P13541,Q02566,A2AQP0	A2AAJ9,Q8VDD5,Q6URW6,Q61879,Q5SX40,Q5SX39,P13542,O08638,Q5XKE0,Q62234,P13541,Q91Z83,Q02566,P70402,A2AQP0	0.00212634	0.2
GO:0032371	regulation of sterol transport	P	Q00623,P55065,P34928	Q8BYY4,P08226,Q00623,Q60994,P52430,Q91ZX7,P55065,P41233,P06728,P09813,P34928,P32020,Q8CAY6,Q8K4M5,P07356	0.00212634	0.2
GO:1905952	regulation of lipid localization	P	Q00623,P55065,Q8BGW1,P11589,P34928	P11859,Q8JZR0,P35441,Q60823,Q8BYY4,P08226,Q00623,Q60994,P52430,Q91ZX7,P55065,P41233,Q8BGW1,P01027,E9Q4Z2,Q08857,Q9WVK4,P30204,P11152,Q61009,P11589,P43406,P14847,Q06180,O54890,Q91V79,Q8CI95,B9EJ86,P06728,P09813,Q99N16,P97450,Q9QUJ7,P70236,Q9WTU6,Q9Z1M0,P34928,P32020,Q8CAY6,P35235,P34884,P70704,P61979,Q62028,Q8CGC7,P11404,P28867,Q8K4M5,Q9Z2A7,P07356,P81117,B9EKI3,Q99P87	0.00233918	0.0943396
GO:0006639	acylglycerol metabolic process	P	P34928,Q62264,Q60714,Q00623,Q9Z2V4	P31786,P08226,P11352,P24270,P49817,Q01339,P34928,P33622,Q08857,P13516,Q64516,P51637,P97742,Q9Z2G6,P35235,Q05421,Q91WG1,Q8VBT6,Q61586,Q61469,Q91ZV4,P01027,Q62264,Q8JZR0,Q9Z2A7,Q60714,Q3UJ81,O70362,P35951,Q61009,O88307,P06728,Q99PG0,P41216,P11152,Q8C0N2,Q9QUJ7,Q14DK4,Q00623,O35678,P54310,Q8BH04,Q9Z2V4,Q80UP3,Q8BHF7,O88673,P09813,Q91WC9,Q8VCT4,Q99LR1,Q8R2Y0,Q9Z1Q2,O08914,Q7TMF5,Q8BHJ5	0.00275779	0.0909091
GO:0006638	neutral lipid metabolic process	P	P34928,Q62264,Q60714,Q00623,Q9Z2V4	P31786,P08226,P11352,P24270,P49817,Q01339,P34928,P33622,Q08857,P13516,Q64516,P51637,P97742,Q9Z2G6,P35235,Q05421,Q91WG1,Q8VBT6,Q61586,Q61469,Q91ZV4,P01027,Q62264,Q8JZR0,Q9Z2A7,Q60714,Q3UJ81,O70362,P35951,Q61009,O88307,P06728,Q99PG0,P41216,P11152,Q8C0N2,Q9QUJ7,Q14DK4,Q00623,O35678,P54310,Q8BH04,Q9Z2V4,Q80UP3,Q8BHF7,O88673,P09813,Q91WC9,Q8VCT4,Q99LR1,Q8R2Y0,Q9Z1Q2,O08914,Q7TMF5,Q8BHJ5,O55042	0.00298631	0.0892857
GO:0006654	phosphatidic acid biosynthetic process	P	Q8K3K7,Q60714	Q8K3K7,Q60714,Q80UP3,Q9JK48,O88673	0.00302757	0.4
GO:0032673	regulation of IL-4 production	P	P49290,Q61878	P20491,P49290,Q61878,P28033,P11609	0.00302757	0.4
GO:0032753	positive regulation of IL-4 production	P	P49290,Q61878	P11609,P20491,P49290,Q61878,P28033	0.00302757	0.4
GO:0046473	phosphatidic acid metabolic process	P	Q8K3K7,Q60714	Q8K3K7,Q60714,Q80UP3,Q9JK48,O88673	0.00302757	0.4
GO:0046337	phosphatidylethanolamine metabolic process	P	Q60714,P39654	Q60714,P39654,Q922E4,Q8BGS7,Q8VEB4	0.00302757	0.4
GO:0033344	cholesterol efflux	P	Q00623,P55065,P34928	Q8BYY4,P08226,Q00623,Q60994,P52430,Q91ZX7,P55065,P41233,P06728,Q9Z0J0,P49817,P34928,Q9ER00,P09813,Q61263,O35604,Q61009	0.00309705	0.176471
GO:0071827	plasma lipoprotein particle organization	P	Q00623,P34928,P55065	Q00623,P09813,P34928,P11152,P08226,P06728,P16301,P11247,Q60963,P55065,Q61009,Q8VCT4,Q9Z2A7,P22315,Q61263,Q9CZW4,P41233	0.00309705	0.176471
GO:0070584	mitochondrion morphogenesis	P	P11589,Q811U4,Q9Z2C5	P52503,P11589,Q9CQ92,Q07813,Q6URW6,Q9CYR0,Q9D8T7,Q8K1M6,P58281,Q9EQG9,Q64373,Q91VA6,P97478,Q811U4,Q6PCP5,Q9Z2C5,Q80YD1	0.00309705	0.176471
GO:0051055	negative regulation of lipid biosynthetic process	P	P34928,Q60714,P11589	Q91WG1,P25799,Q8VDN2,Q9QUN9,P08228,P08226,Q8BFZ9,Q91X78,P50544,P51174,P34928,Q60714,E9Q4S1,Q9D906,Q8K023,Q9CQZ0,P11589,Q7TMF5	0.00366898	0.166667
GO:0008610	lipid biosynthetic process	P	Q60714,P39654,Q8K3K7,Q00623,Q9D0S9,Q62264,Q9QXG4,P34928,Q9Z2V4,P11589	Q9R0Q7,P34884,Q9JM51,P04441,Q9DB60,P22437,Q9JHF7,Q8BWM0,P36423,Q50L41,Q00915,P22935,P24549,Q8VCH7,P42867,O70152,Q9D1Q4,Q99LV7,Q9WTK3,Q91YL7,Q3UUQ7,Q91V92,O35678,P19096,Q5MPP0,O70503,Q5SWU9,P55096,P13516,P50171,Q91VT4,E9Q4Z2,Q9DCS3,O54950,Q6T707,Q5EG47,Q8R3F5,P11152,Q9D404,O09005,Q99J39,Q80W40,Q9CZW4,Q9JLJ5,Q9EQC4,Q9D2Y9,Q8BHI7,Q60714,P39654,Q922E4,Q8BGS7,Q61469,Q91ZV4,Q8K3K7,Q80UP3,Q9JK48,O88673,…	0.00424873	0.0469484
GO:0019432	triglyceride biosynthetic process	P	Q62264,Q60714,Q9Z2V4	P01027,Q62264,Q8JZR0,P33622,Q9Z2A7,Q60714,Q3UJ81,O70362,P35951,Q61586,Q61009,Q8BH04,Q9Z2V4,P41216,P11152,Q8C0N2,Q91ZV4,Q9QUJ7,Q14DK4	0.0043013	0.157895
GO:0071825	protein-lipid complex subunit organization	P	Q00623,P34928,P55065	Q00623,P09813,P34928,P11152,P08226,P06728,P16301,P11247,Q60963,P55065,Q61009,Q8VCT4,Q9Z2A7,P22315,Q61263,Q9CZW4,P41233,O08539,Q91VH2	0.0043013	0.157895
GO:0046460	neutral lipid biosynthetic process	P	Q62264,Q60714,Q9Z2V4	Q61469,Q91ZV4,P01027,Q62264,Q8JZR0,P33622,Q9Z2A7,Q60714,Q3UJ81,O70362,P35951,Q61586,Q61009,P41216,P11152,Q8C0N2,Q9QUJ7,Q14DK4,Q8BH04,Q9Z2V4	0.0049958	0.15
GO:0046463	acylglycerol biosynthetic process	P	Q62264,Q60714,Q9Z2V4	Q61469,Q91ZV4,P01027,Q62264,Q8JZR0,P33622,Q9Z2A7,Q60714,Q3UJ81,O70362,P35951,Q61586,Q61009,P41216,P11152,Q8C0N2,Q9QUJ7,Q14DK4,Q8BH04,Q9Z2V4	0.0049958	0.15
GO:0046890	regulation of lipid biosynthetic process	P	Q62264,Q60714,Q00623,P34928,P11589	Q8K023,Q9WV54,Q64213,Q61581,P01027,Q62264,Q8JZR0,P33622,Q9Z2A7,Q60714,Q3UJ81,O70362,P35951,Q61586,Q61009,P32020,Q91WG1,P25799,P31786,P08226,Q00623,P06728,Q8R2Y0,Q62417,Q9JLN9,Q05816,P10107,P04441,Q9WTU6,P47713,Q8VDN2,Q9QUN9,O55135,O88455,P08228,Q8BFZ9,Q91X78,P37040,Q920E5,Q99J08,P50544,P51174,P34928,P11859,Q8BHI7,P11589,Q7TMF5,O88844,P11404,Q05920,P27786,E9Q4S1,Q9D906,Q8VCH7,Q9CQZ0,P0C605,Q9JIA7,…	0.00533363	0.078125
GO:0010875	positive regulation of cholesterol efflux	P	Q00623,P55065	P08226,Q00623,Q60994,P52430,Q91ZX7,P55065,P41233	0.00621186	0.285714
GO:0017004	cytochrome complex assembly	P	Q9D2R6,P0DJE0	P53702,Q9D2R6,P0DJE0,Q8BGA9,Q9D855,Q8R1I1,Q61462	0.00621186	0.285714
GO:0034375	high-density lipoprotein particle remodeling	P	Q00623,P55065	P08226,Q00623,P09813,P55065,P16301,P11152,Q61009	0.00621186	0.285714
GO:0032633	interleukin-4 production	P	P49290,Q61878	P20491,P49290,Q61878,P28033,P11609,Q61730,O35516	0.00621186	0.285714
GO:0032693	negative regulation of interleukin-10 production	P	P49290,Q61878	O54885,Q18PI6,P49290,Q61878,P08101,Q9D659,Q9EP73	0.00621186	0.285714
GO:0033700	phospholipid efflux	P	Q00623,P34928	P08226,Q00623,P06728,P34928,P09813,O35379,P41233	0.00621186	0.285714
GO:0032007	negative regulation of TOR signaling	P	Q9D1F4,Q9Z2C5	Q9WV60,Q9D1F4,P12815,Q5EG47,Q570Y9,Q6WKZ8,Q9Z2C5	0.00621186	0.285714
GO:1990777	lipoprotein particle	C	Q00623,P34928,P55065	P08226,Q00623,Q9BCZ4,P30204,P35951,Q8VBT6,Q60963,O88307,P06728,Q01339,P34928,Q8VDJ3,P09813,P52430,P55065,O70362,P31532,P16301,P33622,P11152,Q9CQF9,Q06890	0.00657784	0.136364
GO:0034358	plasma lipoprotein particle	C	Q00623,P34928,P55065	P08226,Q00623,Q9BCZ4,P30204,P35951,Q8VBT6,Q60963,O88307,P06728,Q01339,P34928,Q8VDJ3,P09813,P52430,P55065,O70362,P31532,P16301,P33622,P11152,Q06890,Q9CQF9	0.00657784	0.136364
GO:0046470	phosphatidylcholine metabolic process	P	Q00623,Q60714,P34928	Q05816,Q00623,P09813,P49586,Q60714,P16301,Q8BGS7,P35951,Q61009,P34928,Q99LY2,Q8VEB4,P31786,Q8BYI6,P11404,O08529,Q8QZZ8,Q9CZW4,P06728,Q9Z2D6,P52430,O70362	0.00657784	0.136364
GO:0046474	glycerophospholipid biosynthetic process	P	Q60714,P39654,Q8K3K7,Q00623	O70152,Q9D1Q4,Q99LV7,Q9WTK3,Q91YL7,Q3UUQ7,Q60714,P39654,Q922E4,Q8BGS7,Q8K3K7,Q80UP3,Q9JK48,O88673,Q8BHF7,Q05816,Q00623,P09813,P49586,P16301,O55023,Q2TBE6,Q8VDP6,Q80WQ2,Q8CIH5,P70181,Q8BYI6,Q9D517,Q99L43,Q3UN02,Q8K4X7,Q8C0N2,Q61586,Q14DK4,Q6PD26,Q9CXY9,Q6PF93,Q8BTI9,P11404,O08529,Q8QZZ8,Q9CZW4,Q922J9	0.00682386	0.0930233
GO:0055102	lipase inhibitor activity	F	P34928,Q00623	P34928,P10107,P07356,O35639,Q00623,P33622,P09813,Q3TDN2	0.00818699	0.25
GO:0070300	phosphatidic acid binding	F	P55065,Q8BGT6	Q9WVE8,Q9ET78,P58281,P55065,Q9D8T2,Q8K4M5,Q8BGT6,Q8CHG7	0.00818699	0.25
GO:0010874	regulation of cholesterol efflux	P	Q00623,P55065	P08226,Q00623,Q60994,P52430,Q91ZX7,P55065,P41233,Q8BYY4	0.00818699	0.25
GO:0031300	intrinsic component of organelle membrane	C	Q91W53,Q9D8T4,Q9QXY9,Q811U4,Q9D2R6,P0DJE0	Q91W53,Q6P6M5,O89051,E9PZQ0,O54909,Q9Z2P8,Q9CR20,Q8BND5,Q9CQE7,P70403,Q9CX30,Q9CQU3,Q61420,Q9D8T4,Q91ZN5,Q9DBS1,Q8BJS4,Q9D666,Q6DVA0,Q9JJX6,Q9Z1M0,Q9CQ92,Q7TNT2,Q922J9,P48410,O70579,Q9QXY9,P63024,P63044,O70439,Q9ER00,Q8BI08,O55100,P11438,Q9Z1G4,O09117,Q8K021,P56695,Q9JKK1,P46096,Q8BVI5,P70704,P48962,Q9QYA2,P70444,Q6PCP5,Q8VCX5,Q8BGA9,Q925Q3,Q3TBT3,P51150,P61027,P46638,Q9CQD1,P35278,P53994,Q91V41,…	0.00880647	0.0594059
GO:0006644	phospholipid metabolic process	P	Q60714,P39654,Q8BWF0,Q8K3K7,Q00623,P34928,Q9Z2C5	P42867,Q3UUQ7,O70152,Q9D1Q4,Q99LV7,Q9WTK3,Q91YL7,O70362,Q60714,P39654,Q922E4,Q8BGS7,Q8CHP8,Q8VEB4,Q8BWF0,Q61586,P98192,Q8K3K7,Q80UP3,Q9JK48,O88673,Q8BHF7,Q05816,Q00623,P09813,P49586,P16301,Q9QZI9,Q8BHJ6,Q99LR1,Q9Z1Q2,O55023,Q2TBE6,Q8VDP6,Q80WQ2,Q8CIH5,P70181,Q8BYI6,Q9JI99,Q9JIA7,O70572,P58242,Q04519,Q6ZPR5,O35704,P97363,Q8JZR0,P20060,Q91V01,Q9DAV9,Q9JHU9,Q91V79,Q8CHK3,Q14DK4,P58044,Q8R2Y0,Q62077,…	0.00942361	0.0522388
GO:0048311	mitochondrion distribution	P	Q811U4,Q9Z2C5	Q8K1M6,Q9D6K5,P58281,Q5SW19,Q8CGY8,Q811U4,Q9JHD2,Q9D2G5,Q9Z2C5	0.0104049	0.222222
GO:0015914	phospholipid transport	P	Q00623,P34928,P55065	Q9Z1M0,O35600,O35114,Q8VEK0,P08226,Q00623,P06728,P34928,P09813,O35379,P41233,O70228,Q6P9J9,P98195,Q6UQ17,P70704,P98197,Q9QZW0,P28867,P53810,P53811,P32020,P55065,P35951,Q9JMD3,B9EJ86,Q61009	0.0117198	0.111111
GO:0008198	ferrous iron binding	F	Q9D7P6,Q8BGW1	P09528,P29391,Q921I1,Q61503,O55042,Q05117,Q9D7P6,Q8BGW1,P70697,Q4JK59	0.0128566	0.2
GO:0060192	negative regulation of lipase activity	P	P34928,Q00623	P34928,P33622,Q6PHU5,P10107,O35640,Q62028,Q8BR07,Q00623,P37040,P09813	0.0128566	0.2
GO:0031228	intrinsic component of Golgi membrane	C	Q9D8T4,Q91W53	Q9CR20,Q8BND5,Q9CQE7,P70403,Q9CX30,Q9CQU3,Q61420,Q9D8T4,Q91ZN5,Q91W53	0.0128566	0.2
GO:0045833	negative regulation of lipid metabolic process	P	P34928,P11589,Q60714	Q91WG1,P33622,O70362,O88307,P34928,P25799,Q8VDN2,P31786,E9Q4Z2,Q9QUN9,P08228,P08226,Q8BFZ9,Q91X78,P50544,P51174,Q8K3G9,P09813,Q5EG47,Q91X84,P11589,Q7TMF5,P51910,Q60714,E9Q4S1,Q9D906,Q6PD03,Q8K023,Q9CQZ0	0.0142721	0.103448
GO:0010866	regulation of triglyceride biosynthetic process	P	Q60714,Q62264	Q8JZR0,P33622,Q9Z2A7,Q60714,Q3UJ81,O70362,P35951,Q61586,Q61009,P01027,Q62264	0.0155332	0.181818
GO:0034361	very-low-density lipoprotein particle	C	Q00623,P34928	P08226,Q00623,P06728,Q01339,P34928,P33622,P09813,Q9CQF9,Q9BCZ4,Q8VBT6,P11152	0.0155332	0.181818
GO:0032376	positive regulation of cholesterol transport	P	Q00623,P55065	P08226,Q00623,Q60994,P52430,Q91ZX7,P55065,P41233,P32020,Q8CAY6,Q8K4M5,P07356	0.0155332	0.181818
GO:0034385	triglyceride-rich plasma lipoprotein particle	C	Q00623,P34928	P08226,Q00623,P06728,Q01339,P34928,P33622,P09813,Q9CQF9,Q9BCZ4,Q8VBT6,P11152	0.0155332	0.181818
GO:0006656	phosphatidylcholine biosynthetic process	P	Q00623,Q60714	P49586,P11404,O08529,Q8QZZ8,Q9CZW4,Q05816,Q00623,P09813,Q60714,P16301,Q8BGS7	0.0155332	0.181818
GO:0032373	positive regulation of sterol transport	P	Q00623,P55065	P08226,Q00623,Q60994,P52430,Q91ZX7,P55065,P41233,P32020,Q8CAY6,Q8K4M5,P07356	0.0155332	0.181818
GO:0019915	lipid storage	P	Q8BGW1,P11589,Q00623	P08226,Q61263,Q8BGW1,P01027,E9Q4Z2,Q08857,Q9WVK4,P30204,P11152,Q61009,Q8BYY4,P11589,P43406,P14847,Q06180,O54890,Q91V79,Q8CI95,B9EJ86,P52019,Q00623,P49817,P43883,P20060,Q9Z2A7,Q60648,Q9ESD7,P29416,P42232,A2AAE1	0.0156572	0.1
GO:0030301	cholesterol transport	P	Q00623,P55065,P34928	Q8BYY4,P08226,Q00623,Q60994,P52430,Q91ZX7,P55065,P41233,Q9ERG0,Q08857,P35951,P06728,P09813,Q9Z0J0,Q8VEJ9,Q3B7Z2,O35604,P34928,P32020,P49817,Q9ER00,Q61263,Q61009,P16301,Q8CAY6,Q9EPQ7,Q8K4M5,P07356,P46467,P30204	0.0156572	0.1
GO:0015918	sterol transport	P	Q00623,P55065,P34928	Q8BYY4,P08226,Q00623,Q60994,P52430,Q91ZX7,P55065,P41233,Q9ERG0,Q08857,P35951,P06728,P09813,Q9Z0J0,P46467,P30204,P16301,O35604,Q61009,Q8VEJ9,Q3B7Z2,P34928,P32020,P49817,Q9ER00,Q61263,Q8CAY6,Q9EPQ7,Q8K4M5,P07356	0.0156572	0.1
GO:0031301	integral component of organelle membrane	C	Q9QXY9,Q9D8T4,Q9D2R6,P0DJE0,Q811U4	Q9DBS1,Q8BJS4,Q9D666,Q6DVA0,Q9JJX6,Q9Z1M0,Q9CQ92,Q7TNT2,Q922J9,Q6P6M5,P48410,O70579,Q9QXY9,Q9CR20,Q8BND5,Q9CQE7,P70403,Q9CX30,Q9CQU3,Q61420,Q9D8T4,Q91ZN5,P63024,P63044,O70439,Q9ER00,Q8BI08,O55100,P11438,Q9Z1G4,O09117,Q8K021,P56695,Q9JKK1,P46096,Q8BVI5,P70704,P48962,Q9QYA2,P70444,Q6PCP5,Q8VCX5,Q8BGA9,Q925Q3,Q3TBT3,P17047,O35604,Q8VEM8,Q921G7,Q9D2R6,Q9DCZ4,P63030,Q99JR1,Q8BT35,Q3UMR5,Q9D023,P0DJE0,…	0.0163775	0.0595238
GO:0035305	negative regulation of dephosphorylation	P	F8VPU2,Q70KF4,P60840	P61022,Q5SYD0,Q6P9Q6,F8VPU2,Q6NZN0,Q810V0,Q5ND34,O08856,P83741,Q66JQ7,P58389,P26883,Q8BH58,Q6R891,Q70KF4,P62259,Q9CQV8,Q61249,P60840,P56212,Q8R3G1,P70336,P70335,P97434,O88351,Q8K1X4,Q6A028,P08752,Q8CI61,Q9JKF1,Q8C5L6	0.0171155	0.0967742
GO:0042742	defense response to bacterium	P	Q64008,P18524,P49290,Q61878,P06327	Q91VE3,Q3UP87,P50446,P30681,P51437,P08905,P41317,Q08857,Q9Z0E6,P62892,P62862,Q09014,P13516,Q921Z5,Q05117,P60603,P28293,Q61107,Q9D8T2,P70248,P39039,P14234,Q8R2U0,Q61805,Q9Z1M0,Q9Z0F8,Q8BV57,A1L314,Q9CZX8,P62889,Q9EPB4,P08071,P01872,Q9QZ85,P01592,P01868,P97430,Q8K0E8,E9PV24,P19221,Q8VDQ8,O08691,P28798,O08573,Q64008,Q61462,Q9D2Q8,P62821,O35639,Q91V41,P01837,P01901,P01863,P06330,Q61646,P01867,P18528,…	0.0171629	0.0588235
GO:0047977	hepoxilin-epoxide hydrolase activity	F	P39654	P39654	0.0178066	1
GO:0032458	slow endocytic recycling	P	Q8BGT6	Q8BGT6	0.0178066	1
GO:0015684	ferrous iron transport	P	Q9D7P6	Q9D7P6	0.0178066	1
GO:0035962	response to interleukin-13	P	P39654	P39654	0.0178066	1
GO:0070344	regulation of fat cell proliferation	P	Q8BGW1	Q8BGW1	0.0178066	1
GO:0005009	insulin-activated receptor activity	F	P11589	P11589	0.0178066	1
GO:1904438	regulation of ferrous iron import across plasma membrane	P	Q9D7P6	Q9D7P6	0.0178066	1
GO:0070341	fat cell proliferation	P	Q8BGW1	Q8BGW1	0.0178066	1
GO:0018230	peptidyl-L-cysteine S-palmitoylation	P	Q91W53	Q91W53	0.0178066	1
GO:1904379	protein localization to cytosolic proteasome complex involved in ERAD pathway	P	Q9CVD2	Q9CVD2	0.0178066	1
GO:0002268	follicular dendritic cell differentiation	P	Q9WTK5	Q9WTK5	0.0178066	1
GO:0051499	D-aminoacyl-tRNA deacylase activity	F	Q9DD18	Q9DD18	0.0178066	1
GO:0060468	prevention of polyspermy	P	Q9R160	Q9R160	0.0178066	1
GO:0071332	cellular response to fructose stimulus	P	Q9Z2V4	Q9Z2V4	0.0178066	1
GO:0018231	peptidyl-S-diacylglycerol-L-cysteine biosynthetic process from peptidyl-cysteine	P	Q91W53	Q91W53	0.0178066	1
GO:0035514	DNA demethylase activity	F	Q8BGW1	Q8BGW1	0.0178066	1
GO:2001303	lipoxin A4 biosynthetic process	P	P39654	P39654	0.0178066	1
GO:0035513	oxidative RNA demethylation	P	Q8BGW1	Q8BGW1	0.0178066	1
GO:0008192	RNA guanylyltransferase activity	F	Q9CY52	Q9CY52	0.0178066	1
GO:0032545	CURI complex	C	Q9D1C9	Q9D1C9	0.0178066	1
GO:0010900	negative regulation of phosphatidylcholine catabolic process	P	P34928	P34928	0.0178066	1
GO:0033257	Bcl3/NF-kappaB2 complex	C	Q9WTK5	Q9WTK5	0.0178066	1
GO:0010189	vitamin E biosynthetic process	P	P55065	P55065	0.0178066	1
GO:0030899	calcium-dependent ATPase activity	F	Q02566	Q02566	0.0178066	1
GO:0060708	spongiotrophoblast differentiation	P	Q69ZR2	Q69ZR2	0.0178066	1
GO:0009750	response to fructose	P	Q9Z2V4	Q9Z2V4	0.0178066	1
GO:0051120	hepoxilin A3 synthase activity	F	P39654	P39654	0.0178066	1
GO:1990050	phosphatidic acid transporter activity	F	P55065	P55065	0.0178066	1
GO:0042335	cuticle development	P	Q9D709	Q9D709	0.0178066	1
GO:0060712	spongiotrophoblast layer development	P	Q69ZR2	Q69ZR2	0.0178066	1
GO:2001301	lipoxin biosynthetic process	P	P39654	P39654	0.0178066	1
GO:0016500	protein-hormone receptor activity	F	P11589	P11589	0.0178066	1
GO:1904232	regulation of aconitate hydratase activity	P	Q9D7P6	Q9D7P6	0.0178066	1
GO:1904234	positive regulation of aconitate hydratase activity	P	Q9D7P6	Q9D7P6	0.0178066	1
GO:0051500	D-tyrosyl-tRNA(Tyr) deacylase activity	F	Q9DD18	Q9DD18	0.0178066	1
GO:0070627	ferrous iron import	P	Q9D7P6	Q9D7P6	0.0178066	1
GO:1905161	protein localization to phagocytic vesicle	P	Q64008	Q64008	0.0178066	1
GO:0000210	NAD+ diphosphatase activity	F	Q9DCN1	Q9DCN1	0.0178066	1
GO:0098707	ferrous iron import across plasma membrane	P	Q9D7P6	Q9D7P6	0.0178066	1
GO:0050473	arachidonate 15-lipoxygenase activity	F	P39654	P39654	0.0178066	1
GO:0008193	tRNA guanylyltransferase activity	F	Q9CY52	Q9CY52	0.0178066	1
GO:0032889	regulation of vacuole fusion, non-autophagic	P	Q920Q4	Q920Q4	0.0178066	1
GO:0004530	deoxyribonuclease I activity	F	Q9D1G0	Q9D1G0	0.0178066	1
GO:0044323	retinoic acid-responsive element binding	F	P97500	P97500	0.0178066	1
GO:0009159	deoxyribonucleoside monophosphate catabolic process	P	Q80VJ3	Q80VJ3	0.0178066	1
GO:0042245	RNA repair	P	Q8BGW1	Q8BGW1	0.0178066	1
GO:1990613	mitochondrial membrane fusion	P	Q811U4	Q811U4	0.0178066	1
GO:0051121	hepoxilin metabolic process	P	P39654	P39654	0.0178066	1
GO:1904640	response to methionine	P	Q9Z2V4	Q9Z2V4	0.0178066	1
GO:0033256	I-kappaB/NF-kappaB complex	C	Q9WTK5	Q9WTK5	0.0178066	1
GO:1903874	ferrous iron transmembrane transport	P	Q9D7P6	Q9D7P6	0.0178066	1
GO:0003332	negative regulation of extracellular matrix constituent secretion	P	Q8C138	Q8C138	0.0178066	1
GO:1900390	regulation of iron ion import	P	Q9D7P6	Q9D7P6	0.0178066	1
GO:0008890	glycine C-acetyltransferase activity	F	O88986	O88986	0.0178066	1
GO:1901074	regulation of engulfment of apoptotic cell	P	P39654	P39654	0.0178066	1
GO:0034456	UTP-C complex	C	Q9D1C9	Q9D1C9	0.0178066	1
GO:1904327	protein localization to cytosolic proteasome complex	P	Q9CVD2	Q9CVD2	0.0178066	1
GO:0061402	positive regulation of transcription from RNA polymerase II promoter in response to acidic pH	P	Q9Z2V4	Q9Z2V4	0.0178066	1
GO:1990931	RNA N6-methyladenosine dioxygenase activity	F	Q8BGW1	Q8BGW1	0.0178066	1
GO:2001302	lipoxin A4 metabolic process	P	P39654	P39654	0.0178066	1
GO:1990984	tRNA demethylase activity	F	Q8BGW1	Q8BGW1	0.0178066	1
GO:0007525	somatic muscle development	P	Q99PR8	Q99PR8	0.0178066	1
GO:0071072	negative regulation of phospholipid biosynthetic process	P	Q60714	Q60714	0.0178066	1
GO:0090258	negative regulation of mitochondrial fission	P	Q811U4	Q811U4	0.0178066	1
GO:0070694	deoxyribonucleoside 5'-monophosphate N-glycosidase activity	F	Q80VJ3	Q80VJ3	0.0178066	1
GO:0002266	follicular dendritic cell activation	P	Q9WTK5	Q9WTK5	0.0178066	1
GO:0006659	phosphatidylserine biosynthetic process	P	Q60714	Q60714	0.0178066	1
GO:0035552	oxidative single-stranded DNA demethylation	P	Q8BGW1	Q8BGW1	0.0178066	1
GO:0034191	apolipoprotein A-I receptor binding	F	Q00623	Q00623	0.0178066	1
GO:0051122	hepoxilin biosynthetic process	P	P39654	P39654	0.0178066	1
GO:0035515	oxidative RNA demethylase activity	F	Q8BGW1	Q8BGW1	0.0178066	1
GO:2001300	lipoxin metabolic process	P	P39654	P39654	0.0178066	1
GO:0032714	negative regulation of interleukin-5 production	P	P49290	P49290	0.0178066	1
GO:1905171	positive regulation of protein localization to phagocytic vesicle	P	Q64008	Q64008	0.0178066	1
GO:0051365	cellular response to potassium ion starvation	P	Q9Z2V4	Q9Z2V4	0.0178066	1
GO:1904439	negative regulation of ferrous iron import across plasma membrane	P	Q9D7P6	Q9D7P6	0.0178066	1
GO:0009013	succinate-semialdehyde dehydrogenase [NAD(P)+] activity	F	Q8BWF0	Q8BWF0	0.0178066	1
GO:0070350	regulation of white fat cell proliferation	P	Q8BGW1	Q8BGW1	0.0178066	1
GO:0035516	oxidative DNA demethylase activity	F	Q8BGW1	Q8BGW1	0.0178066	1
GO:0047820	D-glutamate cyclase activity	F	Q8BH86	Q8BH86	0.0178066	1
GO:0035963	cellular response to interleukin-13	P	P39654	P39654	0.0178066	1
GO:0007522	visceral muscle development	P	Q02566	Q02566	0.0178066	1
GO:0035553	oxidative single-stranded RNA demethylation	P	Q8BGW1	Q8BGW1	0.0178066	1
GO:0043734	DNA-N1-methyladenine dioxygenase activity	F	Q8BGW1	Q8BGW1	0.0178066	1
GO:0070343	white fat cell proliferation	P	Q8BGW1	Q8BGW1	0.0178066	1
GO:1905169	regulation of protein localization to phagocytic vesicle	P	Q64008	Q64008	0.0178066	1
GO:0016405	CoA-ligase activity	F	Q9QXG4,Q60714	Q9QXG4,Q99NB1,P41216,Q8JZR0,Q99PU5,Q80W40,Q9QUJ7,Q9CZW4,Q91VE0,Q60714,O88561,Q9D2R0	0.0184261	0.166667
GO:0120013	intermembrane lipid transfer activity	F	P55065,Q00623	Q3B7Z2,Q9EQG9,P55065,P08226,Q00623,P06728,Q9Z0J0,Q9EPQ7,P32020,P09813,P41233,Q9JL62	0.0184261	0.166667
GO:0034114	regulation of heterotypic cell-cell adhesion	P	Q00623,P39654	Q00623,P25085,Q60994,P04370,O35682,P83741,Q8K0E8,Q8VCM7,E9PV24,P01831,O08917,P39654,P15379	0.021527	0.153846
GO:0000146	microfilament motor activity	F	P13541,Q02566	F8VQB6,Q8VDD5,P13542,Q9WTI7,P13541,Q6URW6,Q91Z83,Q02566,Q61879,Q5SYD0,P46735,Q99104,Q9QY06	0.021527	0.153846
GO:0032653	regulation of interleukin-10 production	P	P49290,Q61878	P49290,Q61878,P08101,Q9D659,Q9EP73,P63038,P20491,Q64314,O54885,Q18PI6,Q9EPB4,O08573,Q61735	0.021527	0.153846
GO:0043516	regulation of DNA damage response, signal transduction by p53 class mediator	P	Q8R143,Q8R5A0	Q61656,Q9D1M4,Q62028,P34884,P04441,Q9Z2X2,P15379,Q8R143,Q6ZQ88,P61255,Q61937,Q80W54,Q8R5A0	0.021527	0.153846
GO:0001676	long-chain fatty acid metabolic process	P	P39654,Q8C138,Q60714	O35678,Q63844,P55249,P39654,Q91WC9,Q64429,P47713,Q99N16,Q9EP75,P22437,P33267,P12791,P12790,Q05421,P51174,P48410,P54310,Q8C138,Q9QYS9,P60202,Q99PU5,Q99104,P34914,Q91V12,P41216,O55137,Q8JZR0,Q8JZN5,Q91VE0,Q9QYR9,Q08857,Q60714,P97742,O88561	0.021933	0.0882353
GO:0015748	organophosphate ester transport	P	Q00623,P55065,P34928	Q9Z1M0,O35600,Q9WU81,P48962,O70579,Q8BMD8,P23242,P53810,Q00623,P53811,P32020,P55065,P35951,Q9JMD3,B9EJ86,Q61009,P41233,O35114,Q8VEK0,P08226,P06728,P34928,P09813,O35379,O70228,Q6P9J9,P98195,Q6UQ17,P70704,P98197,Q9QZW0,Q91ZN5,Q6GQS1,P28867	0.021933	0.0882353
GO:0097006	regulation of plasma lipoprotein particle levels	P	Q00623,P34928,P55065	Q00623,P09813,P34928,P33622,P55302,O70362,P61979,Q9QXT0,P14847,Q3U0V1,P41241,P11152,P08226,P06728,P16301,P11247,Q60963,P55065,Q61009,Q8VCT4,Q9Z2A7,P22315,Q61263,Q9CZW4,P41233,Q08857,P30204,P35951,Q9WVK4,Q60994,Q8K4M5,P07356,Q91V01,Q9JIG7	0.021933	0.0882353
GO:0043062	extracellular structure organization	P	Q8C138,Q00623,Q9WTK5,Q8BLX7,P34928,P55065	P11859,Q9JHH6,Q8C138,P28843,P97321,Q00623,P09813,Q61233,P21844,P20918,P02468,O08917,Q6PGF7,A2AAY5,Q63961,P70124,P11087,Q62009,P16110,Q01149,O08807,P82198,O70503,P08121,P10493,P11276,Q05793,Q61702,O54946,Q8R180,P28862,Q07563,P29788,P28481,O88207,Q3U962,O35206,P39061,Q9WVH9,P03995,Q3TKT4,Q08879,Q5FW85,P12023,Q4ZJM7,P34152,P53690,Q9ERA6,P37889,P33434,Q8R2Z5,Q8K4G2,P34960,Q9WTK5,Q8BLX7,Q61245,Q30D77,…	0.0232611	0.048
GO:0010876	lipid localization	P	Q60714,P55065,Q00623,Q8BGW1,P11589,P34928	Q91VE0,Q60714,P11859,Q9Z1M0,O35600,P08226,P06728,P51910,P33622,Q8VDJ3,Q3U7R1,P09813,Q3TZZ7,P55065,O55242,Q8K449,Q8VBT6,Q8K2A1,Q8R0G7,Q3UVL4,Q61009,P41233,O88307,Q8K441,Q5SSE9,Q8JZR0,P35441,Q60823,Q8BYY4,Q00623,Q60994,P52430,Q91ZX7,Q61263,Q8BGW1,P01027,E9Q4Z2,Q08857,Q9WVK4,P30204,P11152,P11589,P43406,P14847,Q06180,O54890,Q91V79,Q8CI95,B9EJ86,Q9EPT5,Q8R3L5,P41216,P05202,Q9DC50,O70579,Q9QUJ7,Q50L41,…	0.0240843	0.047619
GO:0005044	scavenger receptor activity	F	Q99JR5,Q5U405	Q08857,Q9DBX3,Q61129,Q3V188,O35114,Q2VLH6,Q07797,P29788,Q99JR5,P30204,Q8R4Y4,Q9QWK4,Q5U405,Q8BV57	0.0248276	0.142857
GO:0019814	immunoglobulin complex	C	P18524,P06327,P01648	P01872,P01837,P01863,P06330,P01867,P18528,P18527,P18524,P01806,P18525,P01796,P01820,P01786,P01868,P01795,P06327,P01821,P18531,P01759,P01592,P01660,P01644,P01648,P01646,P01637,P01668,P01636,P01635,P01631,P01634,P04940,P01629,P01633,P01680,P01723,P84750	0.0255148	0.0833333
GO:0008654	phospholipid biosynthetic process	P	Q60714,P39654,Q8K3K7,Q00623	P42867,O70152,Q9D1Q4,Q99LV7,Q9WTK3,Q91YL7,Q3UUQ7,Q60714,P39654,Q922E4,Q8BGS7,Q8K3K7,Q80UP3,Q9JK48,O88673,Q8BHF7,Q05816,Q00623,P09813,P49586,P16301,O55023,Q2TBE6,Q8VDP6,Q80WQ2,Q8CIH5,P70181,Q8BYI6,Q9JIA7,O35704,P97363,P58044,Q8JZK9,P54869,Q9D517,Q99L43,Q3UN02,Q8K4X7,Q8C0N2,Q61586,Q14DK4,Q6PD26,Q9CXY9,Q99JF5,Q9R008,Q920E5,Q6PF93,Q8BTI9,Q922J9,O88844,P11404,Q05920,O08529,Q8QZZ8,Q9CZW4,Q8JZR0,P20060,…	0.0265207	0.0625
GO:0016878	acid-thiol ligase activity	F	Q9QXG4,Q60714	Q9QXG4,Q99NB1,P41216,Q8JZR0,Q99PU5,Q80W40,Q9QUJ7,Q9CZW4,Q91VE0,Q60714,O88561,Q9Z2I9,Q9WUM5,Q9Z2I8,Q9D2R0	0.0283201	0.133333
GO:0032613	interleukin-10 production	P	P49290,Q61878	Q61735,P49290,Q61878,P08101,Q9D659,Q9EP73,P63038,P20491,Q64314,O54885,Q18PI6,Q9EPB4,O08573,Q00612,P28867	0.0283201	0.133333
GO:0042737	drug catabolic process	P	Q91Z98,O88986,Q9Z2V4,P49290	Q91WK5,O35744,Q91Z98,Q9D7Q1,Q8R242,Q62010,P47738,P28474,E9Q3E1,Q64437,P00329,Q80VQ0,P03958,Q61503,Q8CHR6,Q8BVI4,Q9WVL0,P35505,Q8K023,Q9JHR7,Q6P1B1,P49935,P09470,Q4PZA2,Q9DCJ9,O88958,Q9QZ08,Q9CRC9,P82343,Q8JZV7,O88986,Q8K3F7,Q8BH04,Q9Z2V4,Q9D2G2,Q64133,O88587,Q9CXI3,P33267,P12791,Q64462,P12790,Q05421,Q9Z0J4,P02088,P02089,P99029,O08709,Q61171,P35700,P01942,P06728,P11352,P24270,P46412,O08807,P11247,…	0.0307413	0.0597015
GO:0032368	regulation of lipid transport	P	Q00623,P55065,P34928	P11859,Q8JZR0,P35441,Q60823,Q8BYY4,P08226,Q00623,Q60994,P52430,Q91ZX7,P55065,P41233,P06728,P09813,Q99N16,P97450,Q9QUJ7,P70236,Q9WTU6,Q9Z1M0,P43406,O54890,P34928,P32020,Q8CAY6,P35235,P34884,P70704,P61979,Q62028,Q8CGC7,P11404,P28867,Q8K4M5,Q9Z2A7,P07356,P81117,B9EKI3,Q99P87	0.0314419	0.0769231
GO:0061436	establishment of skin barrier	P	Q9D709,Q5U405	Q9Z2K1,O70456,P04104,P54227,Q8VHD8,P11088,Q2VIS4,Q5MPP0,O88551,Q9JLJ5,O35054,O88898,Q99KY4,Q9D709,Q5U405,P16056	0.0319968	0.125
GO:1905953	negative regulation of lipid localization	P	P11589,P34928	P35441,Q60823,Q8BYY4,P11589,P43406,P14847,Q06180,O54890,B9EJ86,Q99N16,P97450,Q9QUJ7,P34928,P09813,P35235,Q62028	0.0319968	0.125
GO:0007224	smoothened signaling pathway	P	Q64008,Q9D6H2	P35288,Q6VH22,Q7TN16,P37040,P26231,Q64008,Q3URV1,P05132,P68181,P42208,Q9R1J0,O35465,Q9D6H2,Q9WUL7,P48614,O08848	0.0319968	0.125
GO:0016459	myosin complex	C	P13541,Q02566,A2AQP0	Q8VDD5,Q9CQ19,Q3THE2,Q6URW6,Q61879,Q60605,Q8CI43,Q99104,Q5SX40,Q5SX39,P13542,O08638,Q5XKE0,Q62234,P13541,Q91Z83,Q02566,P70402,A2AQP0,A2ASS6,Q9D0M5,A2AAJ9,P97457,P05977,Q9WTI7,P09542,P51667,Q9JMH9,Q5SYD0,E9Q634,P46735,Q64331,P09541,P70248,Q5SUA5,Q6AW69,Q9QY06,F8VQB6,P59242,Q99MZ6	0.0335646	0.075
GO:0006629	lipid metabolic process	P	Q60714,P34928,Q00623,P39654,Q8BWF0,Q8K3K7,Q9D0S9,Q9QXG4,Q62264,Q9Z2V4,Q8C138,P11589,Q9Z2C5,P55065	Q921H8,P51660,Q91VE0,Q9QYR9,Q9R0H0,Q99PU5,Q61285,P48410,O09012,Q99N16,Q9R0Q7,P34884,Q9JM51,P04441,Q9DB60,P22437,Q9JHF7,Q8BWM0,P36423,Q50L41,P45376,P28474,P45377,Q64437,Q9QYF1,P24549,P00329,Q08652,O54909,Q9QXE0,P41216,O55137,Q8JZR0,Q8JZN5,Q08857,Q60714,P97742,O88561,Q00915,P22935,Q8VCH7,Q05421,P00184,Q9DBE8,P42867,Q3UUQ7,O70152,Q9D1Q4,Q99LV7,Q9WTK3,Q91YL7,O70362,P11404,P04117,P56395,P52503,P01027,…	0.0340054	0.0301075
GO:0034382	chylomicron remnant clearance	P	P34928	P08226,P34928	0.0352996	0.5
GO:2000425	regulation of apoptotic cell clearance	P	P39654	P39654,P01027	0.0352996	0.5
GO:0004611	phosphoenolpyruvate carboxykinase activity	F	Q9Z2V4	Q8BH04,Q9Z2V4	0.0352996	0.5
GO:0019518	L-threonine catabolic process to glycine	P	O88986	O88986,Q8K3F7	0.0352996	0.5
GO:0005550	pheromone binding	F	P11589	P11589,B5X0G2	0.0352996	0.5
GO:0042360	vitamin E metabolic process	P	P55065	P55065,Q99N16	0.0352996	0.5
GO:0006655	phosphatidylglycerol biosynthetic process	P	Q60714	Q60714,Q8BHF7	0.0352996	0.5
GO:0055009	atrial cardiac muscle tissue morphogenesis	P	Q02566	Q02566,Q63961	0.0352996	0.5
GO:0010901	regulation of very-low-density lipoprotein particle remodeling	P	Q00623	Q00623,P09813	0.0352996	0.5
GO:0072677	eosinophil migration	P	P49290	P16110,P49290	0.0352996	0.5
GO:0031086	nuclear-transcribed mRNA catabolic process, deadenylation-independent decay	P	Q91YD3	Q91YD3,Q3UJB9	0.0352996	0.5
GO:0010903	negative regulation of very-low-density lipoprotein particle remodeling	P	Q00623	Q00623,P09813	0.0352996	0.5
GO:0032634	interleukin-5 production	P	P49290	P49290,Q61730	0.0352996	0.5
GO:0098942	retrograde trans-synaptic signaling by trans-synaptic protein complex	P	F8VPU2	Q62165,F8VPU2	0.0352996	0.5
GO:0032375	negative regulation of cholesterol transport	P	P34928	P09813,P34928	0.0352996	0.5
GO:0004613	phosphoenolpyruvate carboxykinase (GTP) activity	F	Q9Z2V4	Q8BH04,Q9Z2V4	0.0352996	0.5
GO:0002740	negative regulation of cytokine secretion involved in immune response	P	Q00623	Q00623,P09813	0.0352996	0.5
GO:0046327	glycerol biosynthetic process from pyruvate	P	Q9Z2V4	Q8BH04,Q9Z2V4	0.0352996	0.5
GO:0002070	epithelial cell maturation	P	Q9D709	P23242,Q9D709	0.0352996	0.5
GO:0120017	intermembrane ceramide transfer activity	F	P55065	Q9EQG9,P55065	0.0352996	0.5
GO:0019677	NAD catabolic process	P	Q9DCN1	Q9CWD3,Q9DCN1	0.0352996	0.5
GO:0090385	phagosome-lysosome fusion	P	Q64008	P51150,Q64008	0.0352996	0.5
GO:0032674	regulation of interleukin-5 production	P	P49290	P49290,Q61730	0.0352996	0.5
GO:0032049	cardiolipin biosynthetic process	P	Q60714	Q60714,Q8BHF7	0.0352996	0.5
GO:0048665	neuron fate specification	P	P97500	Q3US41,P97500	0.0352996	0.5
GO:0034365	discoidal high-density lipoprotein particle	C	Q00623	P08226,Q00623	0.0352996	0.5
GO:1902669	positive regulation of axon guidance	P	Q9CWF2	P97333,Q9CWF2	0.0352996	0.5
GO:0031650	regulation of heat generation	P	Q60714	Q60714,P61922	0.0352996	0.5
GO:1990913	sperm head plasma membrane	C	Q9R160	P11499,Q9R160	0.0352996	0.5
GO:1905446	regulation of mitochondrial ATP synthesis coupled electron transport	P	Q9D7P6	Q99LX0,Q9D7P6	0.0352996	0.5
GO:0015245	fatty acid transmembrane transporter activity	F	Q60714	Q9EPT5,Q60714	0.0352996	0.5
GO:1905448	positive regulation of mitochondrial ATP synthesis coupled electron transport	P	Q9D7P6	Q99LX0,Q9D7P6	0.0352996	0.5
GO:0060354	negative regulation of cell adhesion molecule production	P	Q00623	Q00623,P55088	0.0352996	0.5
GO:0052629	phosphatidylinositol-3,5-bisphosphate 3-phosphatase activity	F	Q9Z2C5	Q9Z2C4,Q9Z2C5	0.0352996	0.5
GO:0048630	skeletal muscle tissue growth	P	Q9Z2C5	O88990,Q9Z2C5	0.0352996	0.5
GO:0070989	oxidative demethylation	P	Q8BGW1	Q4JK59,Q8BGW1	0.0352996	0.5
GO:0001579	medium-chain fatty acid transport	P	Q60714	Q91VE0,Q60714	0.0352996	0.5
GO:0019413	acetate biosynthetic process	P	Q9QXG4	Q9QXG4,Q99NB1	0.0352996	0.5
GO:0106018	phosphatidylinositol-3,5-bisphosphate phosphatase activity	F	Q9Z2C5	Q9Z2C4,Q9Z2C5	0.0352996	0.5
GO:0035511	oxidative DNA demethylation	P	Q8BGW1	Q8BGW1,Q4JK59	0.0352996	0.5
GO:0019542	propionate biosynthetic process	P	Q9QXG4	Q9QXG4,Q99NB1	0.0352996	0.5
GO:0003335	corneocyte development	P	Q9D1G0	Q61207,Q9D1G0	0.0352996	0.5
GO:0019427	acetyl-CoA biosynthetic process from acetate	P	Q9QXG4	Q9QXG4,Q99NB1	0.0352996	0.5
GO:0048633	positive regulation of skeletal muscle tissue growth	P	Q9Z2C5	O88990,Q9Z2C5	0.0352996	0.5
GO:0097576	vacuole fusion	P	Q920Q4	Q920Q4,Q5KU39	0.0352996	0.5
GO:0030992	intraciliary transport particle B	C	Q9D6H2	Q9D6H2,Q6VH22	0.0352996	0.5
GO:0070268	cornification	P	Q9D709	O89094,Q9D709	0.0352996	0.5
GO:0042144	vacuole fusion, non-autophagic	P	Q920Q4	Q920Q4,Q5KU39	0.0352996	0.5
GO:0003228	atrial cardiac muscle tissue development	P	Q02566	Q02566,Q63961	0.0352996	0.5
GO:0071830	triglyceride-rich lipoprotein particle clearance	P	P34928	P08226,P34928	0.0352996	0.5
GO:0031087	deadenylation-independent decapping of nuclear-transcribed mRNA	P	Q91YD3	Q91YD3,Q3UJB9	0.0352996	0.5
GO:0006307	DNA dealkylation involved in DNA repair	P	Q8BGW1	Q8BGW1,E9PZJ8	0.0352996	0.5
GO:0010636	positive regulation of mitochondrial fusion	P	Q811U4	P58281,Q811U4	0.0352996	0.5
GO:1902956	regulation of mitochondrial electron transport, NADH to ubiquinone	P	Q9D7P6	Q99LX0,Q9D7P6	0.0352996	0.5
GO:0004777	succinate-semialdehyde dehydrogenase (NAD+) activity	F	Q8BWF0	Q9Z2I8,Q8BWF0	0.0352996	0.5
GO:1902994	regulation of phospholipid efflux	P	Q00623	P08226,Q00623	0.0352996	0.5
GO:0032372	negative regulation of sterol transport	P	P34928	P34928,P09813	0.0352996	0.5
GO:0016557	peroxisome membrane biogenesis	P	Q9QXY9	Q8VCI5,Q9QXY9	0.0352996	0.5
GO:1902995	positive regulation of phospholipid efflux	P	Q00623	P08226,Q00623	0.0352996	0.5
GO:0003987	acetate-CoA ligase activity	F	Q9QXG4	Q9QXG4,Q99NB1	0.0352996	0.5
GO:0031652	positive regulation of heat generation	P	Q60714	Q60714,P61922	0.0352996	0.5
GO:0098711	iron ion import across plasma membrane	P	Q9D7P6	Q9D7P6,P70387	0.0352996	0.5
GO:0120016	intermembrane sphingolipid transfer activity	F	P55065	Q9EQG9,P55065	0.0352996	0.5
GO:0009450	gamma-aminobutyric acid catabolic process	P	Q8BWF0	Q8BWF0,P61922	0.0352996	0.5
GO:0060467	negative regulation of fertilization	P	Q9R160	Q9R160,Q62010	0.0352996	0.5
GO:1902958	positive regulation of mitochondrial electron transport, NADH to ubiquinone	P	Q9D7P6	Q99LX0,Q9D7P6	0.0352996	0.5
GO:0009975	cyclase activity	F	Q8BH86	Q01341,Q8BH86	0.0352996	0.5
GO:0004052	arachidonate 12-lipoxygenase activity	F	P39654	P55249,P39654	0.0352996	0.5
GO:0048631	regulation of skeletal muscle tissue growth	P	Q9Z2C5	O88990,Q9Z2C5	0.0352996	0.5
GO:0019543	propionate catabolic process	P	Q9Z2V4	Q8BH04,Q9Z2V4	0.0352996	0.5
GO:0032592	integral component of mitochondrial membrane	C	Q9D2R6,P0DJE0,Q811U4	Q8VEM8,Q921G7,Q9D2R6,Q9DCZ4,P63030,Q99JR1,Q8BT35,Q3UMR5,Q9D023,P0DJE0,Q9CXD6,Q8BK08,Q9ESW4,Q8BGA9,P00158,Q9CQ92,Q9D6K8,Q9CZW5,Q9QYA2,O08734,Q9D6K5,Q9DCC8,P97742,Q9DB70,Q8BG51,Q8JZN7,Q811U4,Q8VCM5,Q8JZQ2,Q3ULF4,Q8CAQ8,Q9CRB9,Q78IK4,Q7TNS2,Q8R404,Q5U458,P48962,P70444,Q6PCP5,Q8VCX5,Q925Q3	0.0357603	0.0731707
GO:0042157	lipoprotein metabolic process	P	Q91W53,Q00623,P34928	P97823,O88531,Q9WTL7,Q99LR1,Q9D906,Q8R3E3,Q91VM3,Q9CR39,Q6PF93,P41233,P49443,P36993,O70310,Q99J83,O70152,Q9D1Q4,Q99LV7,Q9WTK3,Q91YL7,Q3UUQ7,Q6PD26,Q9CXY9,Q91W53,P15105,Q9JLJ1,P08226,Q00623,P16301,P18242,P35951,P43406,O54890,Q9D1G3,P51910,P17439,Q8BMG7,Q80UJ7,P06728,P34928,P33622,P09813	0.0357603	0.0731707
GO:0005319	lipid transporter activity	F	Q60714,Q00623,P55065	P11404,P04117,Q91VE0,P55096,Q60714,O35379,P48410,O88561,Q00623,O35114,P55065,Q9JMD3,B9EJ86,P41233,O35600,P53810,P53811,P32020,Q9EPT5,Q8VEK0,Q3B7Z2,A2A8Z1,Q8CI95,Q5QNQ6,Q6P9J9,Q9JIZ9,P86044,Q00724,P06795,Q9JL62,Q9EQG9,P08226,P06728,Q9Z0J0,Q9EPQ7,P09813,Q60648,Q8K449,O35604,Q8K441,Q5SSE9	0.0357603	0.0731707
GO:0044088	regulation of vacuole organization	P	Q920Q4,Q9Z2C5	Q920Q4,P07356,Q9D8B3,O08547,Q8BRF7,O88597,Q9Z2C5,P28798,Q9D1G1,Q9QZM0,Q9JIW9,O70172,Q80XI4,Q9JK48,Q8BMG7,Q80UJ7,Q91XU3	0.0358501	0.117647
GO:0070534	protein K63-linked ubiquitination	P	Q80VI1,Q69ZR2	P59808,P27612,Q8CIE4,Q7TQI3,G5E870,Q9CZY3,P61089,Q9D2M8,Q9WUD1,Q99KP6,P46935,P52483,P62254,Q91YL2,Q6ZPJ3,Q80VI1,Q69ZR2	0.0358501	0.117647
GO:0005548	phospholipid transporter activity	F	P55065,Q00623	P53810,P53811,P32020,P55065,Q8VEK0,Q6P9J9,Q9JIZ9,P86044,P06795,P41233,O35600,Q9JL62,Q9EQG9,Q00623,O35114,Q9JMD3,B9EJ86	0.0358501	0.117647
GO:0006536	glutamate metabolic process	P	Q8BWF0,Q8BH86	P26443,Q8BH59,D3Z7P3,P56564,Q571F8,Q8CHT0,P29758,P05201,P05202,P35492,P15105,Q91YI0,O09172,P97494,Q9Z110,Q8BWF0,Q8BH86	0.0358501	0.117647
GO:0010883	regulation of lipid storage	P	P11589,Q8BGW1	P01027,E9Q4Z2,Q08857,Q9WVK4,P30204,P11152,Q61009,Q8BYY4,P11589,P43406,P14847,Q06180,O54890,Q91V79,Q8CI95,B9EJ86,Q8BGW1	0.0358501	0.117647
GO:0019637	organophosphate metabolic process	P	Q9QXG4,Q00623,Q60714,P39654,Q8BWF0,Q8K3K7,Q9DCN1,Q80VJ3,P34928,P13541,Q02566,Q811U4,Q9Z2C5,Q9D7P6	P48771,Q61387,P56392,Q9CZN7,Q9WUR9,Q6GQS1,P48410,Q64430,Q93092,P47857,Q9WUA3,O88958,P70695,P12382,Q9QXD6,P47856,Q8BZA9,P70265,Q9D7G0,Q9ET01,Q9D0M1,Q8R574,P13707,Q64521,Q9WU81,Q61586,Q14DK4,Q8BWT1,Q91V92,P19096,Q9CZU6,Q8JZK9,Q5SWU9,E9Q4Z2,P54869,Q8QZT1,Q8VDG5,Q9QXG4,Q99NB1,Q99J39,O08749,P35486,Q9D051,Q8BMF4,P35487,P05064,P09411,P52480,P16858,P21550,P17751,P17182,O70250,Q9DBJ1,P06745,O08528,Q60597,…	0.0379442	0.029661
GO:0098573	intrinsic component of mitochondrial membrane	C	Q811U4,Q9D2R6,P0DJE0	Q811U4,Q80U63,P48962,Q9QYA2,P70444,Q6PCP5,Q8VCX5,Q8BGA9,Q925Q3,Q8VEM8,Q921G7,Q9D2R6,Q9DCZ4,P63030,Q99JR1,Q8BT35,Q3UMR5,Q9D023,P0DJE0,Q9CXD6,Q8BK08,Q9ESW4,P00158,Q9CQ92,Q9D6K8,Q9CZW5,O08734,Q9D6K5,Q9DCC8,P97742,Q9DB70,Q8BG51,Q8JZN7,Q8VCM5,Q8JZQ2,Q3ULF4,Q8CAQ8,Q9CRB9,Q78IK4,Q7TNS2,Q8R404,Q5U458	0.0380286	0.0714286
GO:0050709	negative regulation of protein secretion	P	Q00623,P11589,Q8C138	Q00623,P09813,Q9CR00,Q61425,O09106,P12382,P63328,P35235,Q9Z0J4,E9Q4S1,Q60953,P27931,Q9D154,Q9D2C7,P35329,P11589,Q9JIX0,P97820,Q8R361,P26040,Q64314,Q18PI6,O54901,Q9ES30,O08573,Q9QYY1,P48036,P54071,O08691,P11103,P97429,P10107,Q8BV57,P11276,Q08879,P08226,P57759,Q8K0C4,Q8C138,Q80YD6,Q80WQ6,Q9QWI6	0.0380286	0.0714286
GO:0006631	fatty acid metabolic process	P	Q60714,P39654,Q9QXG4,Q9Z2V4,Q8C138,P34928,Q8BWF0	Q921H8,P51660,Q91VE0,Q9QYR9,Q9R0H0,Q99PU5,Q61285,P48410,O09012,Q99N16,Q9R0Q7,P34884,Q9JM51,P04441,Q9DB60,P22437,Q9JHF7,Q8BWM0,P36423,Q50L41,Q9QXE0,P41216,O55137,Q8JZR0,Q8JZN5,Q08857,Q60714,P97742,O88561,Q91V92,O35678,P19096,Q5MPP0,O70503,Q5SWU9,P55096,P13516,P50171,Q91VT4,E9Q4Z2,Q9DCS3,O54950,Q6T707,Q5EG47,Q8R3F5,P11152,Q9D404,O09005,Q99J39,Q80W40,Q9CZW4,Q8BWT1,Q8BMS1,Q8QZT1,Q8BH95,P50544,Q99JY0,…	0.0392958	0.0391061
GO:0035308	negative regulation of protein dephosphorylation	P	Q70KF4,P60840	P58389,P26883,Q8BH58,Q6R891,Q70KF4,P70336,P70335,P97434,O88351,Q8K1X4,P62259,Q6A028,P08752,Q9CQV8,Q61249,P60840,P56212,Q8R3G1	0.0398727	0.111111
GO:0098542	defense response to other organism	P	P49290,Q61878,P18524,P06327,Q80VI1,Q64008	P49290,Q61878,Q9EPB4,P42225,Q9JLJ1,Q8VCF0,Q3TBT3,Q60953,Q6Q899,Q3UIR3,Q8CAS9,Q60520,Q91VE3,Q3UP87,Q9D2Q8,P62821,O35639,Q91V41,P01837,P01901,P01863,P06330,Q61646,P51437,P01867,P18528,P18527,P08905,P18524,P04223,P01872,P11247,P01806,P20491,P18525,P01796,Q91ZW8,P11672,Q09014,P01820,P01786,Q9JI48,P01868,P28033,P60603,P01795,P06327,P28867,P01821,P18531,P01759,Q8R4Y4,B9EKI3,P23611,Q99NH0,O35516,A1L314,…	0.0411801	0.041958
GO:0090207	regulation of triglyceride metabolic process	P	Q62264,Q60714	P01027,Q62264,Q8JZR0,P33622,Q9Z2A7,Q60714,Q3UJ81,O70362,P35951,Q61586,Q61009,O88307,P06728,Q01339,Q99PG0,Q08857,P08226,Q7TMF5,Q8BHJ5	0.0440576	0.105263
GO:0033561	regulation of water loss via skin	P	Q9D709,Q5U405	Q9Z2K1,O70456,P04104,P54227,Q8VHD8,P11088,Q2VIS4,Q5MPP0,O88551,Q9JLJ5,O35054,O88898,Q99KY4,Q9D709,Q5U405,P16056,P09803,P13516,P17439	0.0440576	0.105263
GO:0002792	negative regulation of peptide secretion	P	Q00623,Q8C138,P11589	Q00623,P09813,Q9CR00,Q61425,O09106,P12382,P63328,P35235,Q9Z0J4,E9Q4S1,P10107,P08226,P57759,Q8K0C4,Q8C138,Q80YD6,Q80WQ6,Q9QWI6,Q60953,P27931,Q9D154,Q9D2C7,P35329,A2CG49,P11589,Q9JIX0,P97820,P81117,Q8R361,P26040,Q64314,Q18PI6,O54901,Q9ES30,O08573,Q9QYY1,P48036,P54071,O08691,P11103,P97429,Q8BV57,P11276,Q08879,P04441	0.0452638	0.0666667
GO:0009266	response to temperature stimulus	P	Q9JMC3,Q99PR8,Q60714,Q9CVD2	P07310,P08228,P17879,Q61696,Q61316,P70296,P07901,P35385,Q99JF8,O09165,Q9QYJ0,P63037,P17156,Q9JMC3,Q99PR8,P97494,Q99LC8,Q61749,Q9WTR1,Q99M87,Q8CHW4,P10810,P00158,Q62219,Q9JHH6,Q9Z0J4,P63038,P50544,P51174,P09671,P45952,G5E829,Q9JI48,Q60714,P00405,O89086,P11859,P60824,P11152,Q9CR84,Q5EG47,Q8K3G9,F6ZDS4,P62259,Q01853,P63017,P20029,Q6ZWX6,P38647,O55143,Q69ZN7,Q9WUD1,P05132,P16627,P63166,Q9JLV1,O70133,…	0.0475388	0.0519481
GO:0009749	response to glucose	P	P11589,Q9Z2V4,Q64008,P60840	P46638,Q8R361,P63001,Q9D0K2,Q61768,Q9DAK9,Q6P069,P63168,P70452,P48453,Q91ZX7,Q9D023,O70362,Q9D906,P58058,O70201,Q9DCB1,P11589,Q9JIX0,P97820,E9Q4S1,P16045,Q01768,P15532,P68040,P62835,P11352,P63330,P33622,P97298,P05132,P13597,P63328,O09172,P62996,P97494,Q8BH04,Q922H2,Q9Z2V4,P39447,Q8CGY8,Q9D2R0,Q64008,Q61462,Q5EG47,Q9JIM1,P55088,Q9JHH6,Q8BND3,P97471,Q60520,Q9Z0H3,Q3TKT4,Q9QUI0,P15105,P63044,Q9DC69,…	0.0475388	0.0519481
GO:0030330	DNA damage response, signal transduction by p53 class mediator	P	Q8R5A0,Q8R143	P61255,Q60953,Q6ZWY3,P97929,Q61937,Q80W54,Q8R5A0,Q61656,Q9D1M4,Q62028,P34884,P04441,Q9Z2X2,P15379,Q8R143,Q6ZQ88,Q62433,Q64331,P52479,Q61687	0.0483978	0.1
GO:0051646	mitochondrion localization	P	Q9Z2C5,Q811U4	P08551,Q9R0P9,Q8BG51,Q8JZN7,P14873,Q9Z2C5,Q8K1M6,Q9D6K5,P58281,Q5SW19,Q8CGY8,Q811U4,Q9JHD2,Q9D2G5,P07724,Q8R429,Q9QZB7,Q8VCM5,Q80U63,Q9Z2V5	0.0483978	0.1
GO:0042571	immunoglobulin complex, circulating	C	P18524,P06327	P01592,P01837,P01863,P06330,P01867,P18528,P18527,P18524,P01872,P01806,P18525,P01796,P01820,P01786,P01868,P01795,P06327,P01821,P18531,P01759	0.0483978	0.1
GO:0014888	striated muscle adaptation	P	Q70KF4,Q02566	Q9EQQ9,O88990,Q70KF4,O70624,O55143,Q91Z83,P63328,P19123,O88346,Q9ESZ8,P13020,O70548,Q02566,Q02789,P68134,Q9JK37,Q9JJW5,P48678,Q6Q477,Q9JLN9	0.0483978	0.1
GO:0009746	response to hexose	P	P60840,P11589,Q9Z2V4,Q64008	Q9QUI0,P15105,P63044,Q9DC69,Q02788,P06797,Q60994,P09813,P12382,P60840,P35441,P70677,O08738,Q9BCZ4,O70362,O70145,Q99LC8,P23242,Q9D4G9,Q61749,Q8CHW4,Q61586,P70265,B2RWS6,Q9QZS0,P46638,Q8R361,P63001,Q9D0K2,Q61768,Q9DAK9,Q6P069,P63168,P70452,P48453,Q91ZX7,Q9D023,Q9D906,P58058,O70201,Q9DCB1,P11589,Q9JIX0,P97820,E9Q4S1,Q9Z2V4,P16045,Q01768,P15532,P68040,P62835,P11352,P63330,P33622,P97298,P05132,P13597,…	0.0494509	0.0512821

## Sheet: UF vs NF
GO_ID	Term	Category	TestSeqs	RefSeqs	P value	richFactor
GO:0098644	complex of collagen trimers	C	P11087,Q01149,P28481,P08121,O88207,Q3U962,P02463	P51885,P11087,Q01149,P28481,P08121,O88207,Q3U962,Q9QZS0,Q61245,P08122,P02463	8.87125e-09	0.636364
GO:0098643	banded collagen fibril	C	P11087,Q01149,P28481,P08121,O88207,Q3U962	P51885,P11087,Q01149,P28481,P08121,O88207,Q3U962,Q9QZS0,Q61245	7.54343e-08	0.666667
GO:0005583	fibrillar collagen trimer	C	P11087,Q01149,P28481,P08121,O88207,Q3U962	P11087,Q01149,P28481,P08121,O88207,Q3U962,Q9QZS0,Q61245,P51885	7.54343e-08	0.666667
GO:0048407	platelet-derived growth factor binding	F	P11087,Q01149,P08121,P28481,O88207,P02463	Q3UHX2,Q04857,P11087,Q01149,P08121,P28481,O88207,P05622,P26618,P02463	1.83614e-07	0.6
GO:0005201	extracellular matrix structural constituent	F	P02463,P28654,P11087,Q01149,P08121,P28481,O88207,Q3U962,Q30D77	Q9QZJ6,Q99K41,P02463,P28654,Q9JK53,P11087,Q01149,Q61554,P02468,Q61292,P02469,P08121,Q60675,Q61087,Q07563,P28481,O88207,Q3U962,O35206,P39061,Q08879,Q4ZJM7,A2ASQ1,Q8K4G2,Q61555,Q8BLX7,Q61245,Q30D77,P08122,Q2UY11,Q9QZS0,Q64739	4.15077e-07	0.28125
GO:0071230	response to amino acid stimulus	P	P97494,Q9CR84,P11087,Q01149,P09803,P08121,Q3U962,O88508,P02463	Q8BMJ2,Q6WKZ8,Q9JLN9,O09172,P97494,Q61093,Q61462,Q8BKX1,Q9CR84,Q04857,P11087,Q01149,O08529,Q9D1L9,P09803,Q60668,P16460,P08121,Q99K70,Q8BKC5,O88653,P28862,P28033,Q64373,Q3U962,Q80X95,Q01279,O88508,P13864,P33434,Q8BLX7,P26618,P02463,Q64430	7.34678e-07	0.264706
GO:0005581	collagen trimer	C	P28654,P11087,Q01149,P28481,P08121,O88207,Q3U962,P02463,Q30D77	P51885,P28654,P11087,Q01149,P28481,P08121,O88207,Q3U962,Q9QZS0,Q61245,Q60847,P08122,P02463,Q04857,Q02788,P41317,Q80X19,Q60994,P98086,Q63870,A6H584,Q8C6K9,P14106,Q07563,Q8K4Q8,O35206,P39061,P30204,Q8BVD7,P39039,Q4ZJM7,P28301,Q9D1D6,Q9ES30,Q8K4G2,Q8BLX7,Q30D77,Q8K4P0,Q99K41,Q8K482,Q2UY11,Q64739	5.01353e-06	0.214286
GO:0005576	extracellular region	C	P11087,Q01149,P28481,P08121,P02463,O88207,Q3U962,P27005,P28654,O08692,P10605,P18242,Q9Z0L8,P08071,P51437,Q62000,Q00897,P11247,P49290,Q8BK62,Q9R013,P07146,Q9D695,Q8CE08,Q9CXD9,Q9CQV3,Q30D77,Q8VBT6,Q64314,P14069,P08207,Q61704,Q61878,P56371,O35744,P97347,Q9D3H2,Q3V188,Q91Z98,Q80YT5,P55088	P08226,P02468,Q61292,Q60675,P97927,Q61001,A2ASQ1,Q62010,P70663,Q80YX1,Q61554,Q9QZJ6,Q9D1H9,C0HKD8,P55002,Q61555,Q8K0E8,Q8VCM7,E9PV24,P11276,P35441,Q61247,P51885,P11087,Q01149,P28481,P08121,P08122,P02463,Q9QZS0,O88207,Q3U962,Q61245,Q60847,P14106,P07724,Q921I1,P07356,P14206,O09131,Q8BPB5,P21460,P57016,P82198,P97298,P09055,P02469,Q9CW03,P10493,Q61739,Q05793,A2A863,Q61087,O35566,P07214,P55772,P25785,…	2.07968e-05	0.0608309
GO:0044420	extracellular matrix component	C	P11087,Q01149,P28481,P08121,O88207,Q3U962,P02463	Q61554,Q9QZJ6,Q9D1H9,C0HKD8,P55002,Q61555,P51885,Q61292,P02469,Q61087,Q08879,P70663,Q80YX1,Q99K41,P11087,Q01149,P28481,P08121,O88207,Q3U962,Q9QZS0,Q61245,Q60847,P02468,Q61092,Q61789,Q61001,P08122,P02463,Q62059	3.27405e-05	0.233333
GO:0043200	response to amino acid	P	P11087,Q01149,P09803,P08121,Q3U962,O88508,P02463,P97494,Q9CR84	Q04857,P11087,Q01149,O08529,Q9D1L9,P09803,Q60668,P16460,P08121,Q99K70,Q8BKC5,Q8BMJ2,O88653,P28862,P28033,Q64373,Q3U962,Q80X95,Q01279,O88508,P13864,P33434,Q8BLX7,P26618,P02463,Q9JLN9,Q64430,Q6PF93,Q6WKZ8,O09172,P97494,P17918,P84075,Q9Z0X1,Q8CCJ3,Q9D2C7,O35435,P63089,Q6R891,Q9Z2V4,Q61093,Q61462,Q8BKX1,Q9CR84,Q9DCC8,P18760,Q9QUI0,P19157,P10518,P70677,P51855,Q61024,P25911,Q04207,P43006,P56564,Q61176	6.70466e-05	0.157895
GO:0031012	extracellular matrix	C	P28654,P10605,P18242,P14069,P11087,Q01149,Q62000,P08207,P08121,Q61704,Q61878,P28481,O88207,P07146,Q3U962,Q30D77,P02463,Q9CXD9	P16045,Q62426,P52480,P48036,P97429,P10107,P14211,P04104,P07356,P14824,Q60854,Q9D154,O35639,P28654,Q8K0E8,P97352,P07759,Q99MQ4,P28653,P14206,Q9JK53,Q04857,P07901,P50543,P51885,P10605,P18242,P29699,P19324,P32261,P14069,P11087,Q9QZZ6,Q8BH61,P21981,Q62009,Q07076,P16110,Q01149,Q08189,Q9D0E1,Q8BPB5,P20918,Q9D0F3,P97384,P21460,Q62000,P08207,Q60847,Q02788,Q61554,P82198,Q61838,Q8VCM7,P02468,P41317,P21956,…	7.85528e-05	0.0878049
GO:0062023	collagen-containing extracellular matrix	C	P28481,O88207,P02463,P11087,Q01149,P08121,Q3U962,P28654,P10605,P18242,P14069,Q62000,P08207,Q61704,Q61878,P07146,Q30D77	P07724,Q921I1,P07356,P14206,O09131,Q8BPB5,P21460,P57016,Q61554,P82198,P97298,P02468,Q61292,P09055,P02469,Q9CW03,P10493,Q60675,Q61739,P11276,Q05793,A2A863,Q80YX1,Q61087,O35566,P07214,P55772,P25785,Q63870,Q07563,P97927,P29788,Q62165,P28481,O88271,O88207,O88322,O55026,O35206,P39061,O70589,Q3V1T4,Q811D0,Q61789,P63089,Q61092,Q08879,Q61001,Q9Z1T2,Q9EPX2,Q8R2Z5,O08746,A2ASQ1,P08122,P97873,Q03350,A2AJ76,…	9.30548e-05	0.0899471
GO:0001533	cornified envelope	C	Q62267,Q2VIS4,Q8CGN8,P97347,Q3TTY5	Q62266,Q62267,P10107,P56567,P04104,E9Q557,Q8VHD8,P11088,Q2VIS4,P48997,Q08189,Q9D952,Q8CGN8,P97347,Q3TTY5,O70556,P18165,Q8BG67	0.000191689	0.277778
GO:0030199	collagen fibril organization	P	P11087,Q01149,P08121,P28481,O88207,Q3U962	Q640N1,Q99K41,Q8K297,P07356,P51885,P19324,P11087,Q9QZZ6,Q01149,Q80X19,P08121,Q61247,Q60715,P28481,O88207,Q3U962,Q3V1T4,Q8BI84,Q9R0E1,O88609,P28301,Q8BGQ1,Q64429,Q61245,P59016,Q9QZS0,Q64430,Q64739	0.000204037	0.214286
GO:0018149	peptide cross-linking	P	P28654,Q62267,Q8CGN8,Q3TTY5,P08121	P21981,P28654,P28653,Q62266,Q62267,P10107,P04104,E9Q557,Q8BH61,Q08189,Q9D952,Q8CGN8,Q3TTY5,Q9JLF6,P08121,P11276,P35441,O70556,P49222	0.000253485	0.263158
GO:0005198	structural molecule activity	F	Q9D1P0,Q9DC71,Q9Z2K1,Q62267,Q9CWF2,Q5XKE0,Q8CJ40,P11087,Q01149,P08121,P28481,O88207,Q3U962,Q30D77,P02463,Q99PR8,P60202,P28654,Q2VIS4,Q3TTY5,Q61414,Q8CGN8	Q9QZJ6,Q99K41,P62908,P99027,P62830,Q9CQR2,P35979,P63325,P62301,P62702,P25444,P51410,Q9CZX8,Q9Z1P6,P97351,P63323,P62984,P62983,P14131,P62267,P62270,P62889,P14869,Q8BP67,Q6ZWN5,P62281,O09167,P19253,O55142,Q9D823,P62751,P62082,P62245,P62852,P41105,P61358,Q6ZWV3,P62754,Q9JJI8,P14206,P62858,P62242,Q9D8E6,P14148,P62855,P62918,P97461,P47963,P63276,P27659,P47911,Q9D1R9,P62900,P53026,Q9CPR4,P62849,P62264,…	0.000388528	0.0696203
GO:0044421	extracellular region part	C	P27005,P28654,O08692,P10605,P18242,Q9Z0L8,P11087,P08071,Q01149,P51437,Q62000,Q00897,P11247,P08121,P49290,Q8BK62,Q9R013,P28481,O88207,P07146,Q3U962,Q9D695,Q8CE08,Q9CXD9,Q9CQV3,Q30D77,P02463,Q64314,P14069,P08207,Q61704,Q61878,Q8VBT6,P56371	Q8K0E8,Q8VCM7,E9PV24,P11276,P35441,Q61247,P14106,P18760,P16045,P62962,Q62426,P07724,Q05816,P05064,P09411,Q99PT1,P48036,P11404,P10107,P17742,P14211,P07310,Q921I1,P27773,P56567,P63038,P51859,P31786,P45376,P27005,P07356,P08228,O54974,P21614,P63158,P08226,P70124,O35215,Q60854,P01942,Q00623,Q04447,Q9D154,P70296,P28654,P97352,P07759,Q922R8,P28653,P06728,Q3UHX2,O08692,Q9JK53,P00920,Q04857,P31725,P01899,…	0.000456946	0.0569514
GO:0071229	cellular response to acid chemical	P	P11087,Q01149,P09803,P08121,Q3U962,O88508,P02463,P97494,Q9CR84	Q9JJK2,Q04857,P11087,Q01149,O08529,Q9D1L9,P09803,Q60668,P16460,P08121,Q99K70,Q8BKC5,Q8BMJ2,O88653,P28862,P28033,Q64373,Q3U962,Q80X95,Q01279,O88508,P13864,P33434,Q8BLX7,P26618,P02463,Q9JLN9,Q64430,Q6WKZ8,O35129,Q6PIC6,Q9Z0P5,Q9ERS2,P97298,P08730,Q02013,Q8BKG3,Q80YX1,Q9CSN1,Q9QYC0,Q04736,Q9Z2V4,P25911,P28231,Q9JIY5,P46938,P41233,A2AKX3,Q8K023,Q5SWU9,P63094,Q5EG47,Q9DBR0,Q01341,Q01768,P15532,P97742,…	0.000467145	0.123288
GO:0043062	extracellular structure organization	P	Q8C138,P11087,Q01149,P08121,P28481,O88207,Q3U962,Q9WTK5,Q30D77,P02463,P11247,Q64314	P11859,Q9JHH6,Q8C138,P28843,P97321,Q00623,P09813,Q61233,P21844,P20918,P02468,O08917,Q6PGF7,A2AAY5,Q63961,P70124,P11087,Q62009,P16110,Q01149,O08807,P82198,O70503,P08121,P10493,P11276,Q05793,Q61702,O54946,Q8R180,P28862,Q07563,P29788,P28481,O88207,Q3U962,O35206,P39061,Q9WVH9,P03995,Q3TKT4,Q08879,Q5FW85,P12023,Q4ZJM7,P34152,P53690,Q9ERA6,P37889,P33434,Q8R2Z5,Q8K4G2,P34960,Q9WTK5,Q8BLX7,Q61245,Q30D77,…	0.000579743	0.096
GO:0043588	skin development	P	Q3TTY5,Q9Z2K1,Q62267,Q8CGN8,P11087,Q01149,Q2VIS4,Q5U405,P08121,O88207,Q3U962	P31786,Q9D1G0,Q80W54,Q9R1J0,Q8R422,Q5Y4Y6,Q01279,Q61001,Q04207,O88898,Q925H1,Q5MPP0,O70456,P02535,Q80X90,Q3TTY5,P47930,Q9ET54,P34056,Q0VAV2,Q61207,Q62266,Q9Z2K1,Q62267,P10107,E9Q557,Q9QYB1,Q08189,Q9WV54,Q9D952,Q8CGN8,Q9EQG3,Q9JLF6,Q61187,O70556,Q9JI11,P31938,P70677,P22437,Q3TKT4,P97431,P46938,Q9QWL7,Q02248,P06797,Q9R0H5,Q8VCW2,Q9Z320,Q9D709,Q64430,Q9Z331,P50446,Q9R269,Q8VHD8,P48997,P18165,P10287,…	0.000697293	0.1
GO:0009888	tissue development	P	P28481,P02463,Q03173,Q69ZR2,Q5TIS6,Q9Z2K1,Q3U108,P24549,Q3TTY5,P09803,P28654,P11087,P06795,O35465,Q62267,Q8CGN8,Q01149,P39654,P10605,Q9DAW9,O88207,Q8VEN2,Q9CXD9,Q9Z2C5,Q2VIS4,Q5XKE0,Q02566,O70373,P82349,P08121,Q64314,Q9D695,P08071,Q3U962	P47811,P28481,Q61245,P03966,Q02248,P27601,Q63810,Q9JI11,P97333,Q0VBL3,Q63961,P02463,Q3UH93,P24270,P18828,P30115,O35988,Q99JW5,Q811D0,O08691,Q62059,O55222,Q9JJN6,P11859,P15379,Q61001,P97471,Q69Z28,P06745,P05132,Q9DBC7,Q9JMH6,Q9QXZ0,Q9QZH6,Q6DID7,Q8VHI3,Q9Z0E2,Q8K2T8,Q5XJE5,Q8JZM7,Q62018,Q8BKG3,O88898,Q3TPX4,Q8K4E0,P30999,Q61789,P18760,P14824,Q9WUM4,Q9R0G7,Q62178,A2ASS6,Q9R0Q3,O70548,Q8CBW3,P49769,…	0.000765986	0.0553746
GO:0050891	multicellular organismal water homeostasis	P	P09803,Q9Z2K1,Q2VIS4,Q5U405,P55088	P45376,P56695,Q01341,Q02013,P09803,P13516,P17439,Q9Z2K1,O70456,P04104,P54227,Q8VHD8,P11088,Q2VIS4,Q5MPP0,O88551,Q9JLJ5,O35054,O88898,Q99KY4,Q9D709,Q5U405,P16056,P55088,Q8C5L6	0.000991553	0.2
GO:1903225	endodermal cell differentiation	P	O88207,Q3U962	O88207,Q3U962	0.00101587	1
GO:0002215	defense response to nematode	P	P49290,Q61878	P49290,Q61878	0.00101587	1
GO:1903224	regulation of endodermal cell differentiation	P	O88207,Q3U962	O88207,Q3U962	0.00101587	1
GO:2000542	negative regulation of gastrulation	P	O88207,Q3U962	O88207,Q3U962	0.00101587	1
GO:0005584	collagen type I trimer	C	P11087,Q01149	P11087,Q01149	0.00101587	1
GO:0030903	notochord development	P	P28481,Q3U962,Q5TIS6	P28660,P28481,Q3U962,Q5TIS6,P46938,Q5NBX1,Q9QZS0	0.00102098	0.428571
GO:0006026	aminoglycan catabolic process	P	Q8BHC0,O35744,Q91Z98	Q8BHC0,O35744,Q91Z98,Q9D7Q1,Q8R242,Q62010,P15379	0.00102098	0.428571
GO:0032982	myosin filament	C	Q5XKE0,Q02566,P70402,A2AQP0	A2AAJ9,Q8VDD5,Q6URW6,Q61879,Q5SX40,Q5SX39,P13542,O08638,Q5XKE0,Q62234,P13541,Q91Z83,Q02566,P70402,A2AQP0	0.00104213	0.266667
GO:0030104	water homeostasis	P	P55088,P09803,Q9Z2K1,Q2VIS4,Q5U405	P45376,P56695,Q01341,Q02013,Q07076,P55088,P09803,P13516,P17439,Q9Z2K1,O70456,P04104,P54227,Q8VHD8,P11088,Q2VIS4,Q5MPP0,O88551,Q9JLJ5,O35054,O88898,Q99KY4,Q9D709,Q5U405,P16056,Q8C5L6	0.00119633	0.192308
GO:0005615	extracellular space	C	P56371,Q8VBT6,P27005,P28654,O08692,P10605,P18242,Q9Z0L8,P11087,P08071,Q01149,P51437,Q62000,Q00897,P11247,P08121,P49290,Q8BK62,Q9R013,P28481,O88207,P07146,Q3U962,Q9D695,Q8CE08,Q9CXD9,Q9CQV3,Q30D77,P02463	Q8K0E8,Q8VCM7,E9PV24,P11276,P35441,Q61247,P14106,P01837,P01863,P06330,P01867,P18528,P18527,P18524,P01872,P01806,P18525,P01796,P01820,P01786,P01868,P01795,P06327,P01821,P18531,P01759,P07724,P05064,P63260,Q9Z1Q5,P10107,P63017,P63038,P07356,Q61316,O88569,Q9WU78,Q6P069,Q91VM5,Q9JHR7,P61226,P61021,P97449,Q9CZD3,P08730,Q64442,P13597,Q9CX00,Q61187,Q02013,P27612,P17047,P56371,Q62351,P18828,Q8BND5,Q8CJG0,…	0.00124695	0.0570866
GO:0030198	extracellular matrix organization	P	Q8C138,P11087,Q01149,P08121,P28481,O88207,Q3U962,P02463,Q9WTK5,Q30D77	P11859,Q9JHH6,Q8C138,P28843,P97321,Q61233,P21844,P20918,P02468,O08917,Q6PGF7,A2AAY5,Q63961,P07356,P51885,P19324,P11087,Q9QZZ6,Q01149,Q80X19,P08121,Q61247,Q60715,P28481,O88207,Q3U962,Q3V1T4,Q8BI84,Q9R0E1,O88609,P28301,Q8BGQ1,Q64429,Q61245,P59016,Q9QZS0,Q64430,Q64739,P10493,E9Q634,P19258,O70370,O08638,Q9D1H9,Q9WVH9,Q9WVJ9,Q99K41,Q9DAV9,Q61292,P02469,Q61087,P09055,Q62165,Q3TIR3,P34056,P02463,Q8BND5,…	0.00131813	0.0990099
GO:0006022	aminoglycan metabolic process	P	Q8BHC0,O35744,Q91Z98,P28654,Q61704	O70475,P29416,P05622,Q91Z92,Q8R087,Q9ES89,Q8BHC0,O35744,Q91Z98,Q9D7Q1,Q8R242,Q62010,P28654,P28653,Q8R3H7,P20060,Q8BFR4,Q80V26,Q811B1,Q61704,A6X935,Q61702,Q61703,Q8BJD1,P15379,Q8VI16,Q68FD5,P17426,P25799	0.00199895	0.172414
GO:0004866	endopeptidase inhibitor activity	F	Q00897,Q61704,Q9D695,Q9CQV3,P35173,P35175,O08692,P08071	P70124,Q60854,Q9D154,P70296,P07759,P19324,P32261,Q00896,P22599,Q91WP6,Q00897,Q61838,P97298,Q03734,P28666,P12388,P28665,Q5I2A0,Q9D7P9,O08800,Q8K1K6,Q61704,Q9ESB3,A6X935,Q61247,Q61702,Q07456,Q61703,Q8BYY9,P49182,Q63870,P97290,Q06770,Q80X76,Q7TMF5,P11859,Q8R422,P97430,Q8R121,Q9D695,Q9EPX2,P12023,Q8BJD1,Q9CQV3,Q2UY11,Q62426,P35173,P56567,P35175,O08692,P29699,P08071,P21460,O08677,Q9QXC1,Q3UE37,P25785,…	0.00249948	0.106667
GO:0032963	collagen metabolic process	P	P10605,P07146,P11087,O88207,Q9D695,Q01149	P09055,P97321,Q9D1H9,Q99P87,P10605,Q11136,O70370,P28862,P07146,P55097,Q64449,Q61096,P53690,P33434,P34960,P41245,P19324,P11087,Q8BH97,O88207,Q8CG70,Q61176,P62835,P05201,Q9CX80,Q99K41,P20152,P99029,P19221,Q61247,Q9D695,P05622,Q63961,B2RWS6,Q9D659,Q01149,Q3V1T4,Q9R0E1,P28867,Q8BGQ1,Q9Z1M0,P59016,Q8CGB6,O88393	0.00250598	0.136364
GO:0033561	regulation of water loss via skin	P	Q9Z2K1,Q2VIS4,Q5U405,P09803	Q9Z2K1,O70456,P04104,P54227,Q8VHD8,P11088,Q2VIS4,Q5MPP0,O88551,Q9JLJ5,O35054,O88898,Q99KY4,Q9D709,Q5U405,P16056,P09803,P13516,P17439	0.00267795	0.210526
GO:0030414	peptidase inhibitor activity	F	P35175,Q00897,Q61704,Q9D695,Q9CQV3,P35173,O08692,P08071	Q62426,P35175,P01027,Q00896,P22599,Q9JMA1,P21460,Q00897,Q61838,Q9WUP7,P28666,P28665,P01029,P06684,P97430,P70124,Q60854,Q9D154,P70296,P07759,P19324,P32261,Q91WP6,P97298,Q03734,P12388,Q5I2A0,Q9D7P9,O08800,Q8K1K6,Q61704,Q9ESB3,A6X935,Q61247,Q61702,Q07456,Q61703,Q8BYY9,P49182,Q63870,P97290,Q06770,Q80X76,Q7TMF5,P11859,Q8R422,Q8R121,Q9D695,Q9EPX2,P12023,Q8BJD1,Q9CQV3,Q2UY11,P35173,P56567,O08692,P29699,…	0.0029538	0.103896
GO:0005588	collagen type V trimer	C	O88207,Q3U962	O88207,Q3U962,Q9QZS0	0.00298346	0.666667
GO:0018479	benzaldehyde dehydrogenase (NAD+) activity	F	P47739,P24549	P47739,P24549,Q80VQ0	0.00298346	0.666667
GO:0042904	9-cis-retinoic acid biosynthetic process	P	P24549,O54909	P24549,O54909,P00184	0.00298346	0.666667
GO:0042905	9-cis-retinoic acid metabolic process	P	P24549,O54909	P24549,O54909,P00184	0.00298346	0.666667
GO:0042581	specific granule	C	O08692,P08071,P51437	O35639,O08692,P08071,P51437,P97384,O09044,P70452,Q60770,Q64324,Q64704	0.00326084	0.3
GO:0044130	negative regulation of growth of symbiont in host	P	P51437,P11247,P28293	P51437,P41317,Q08857,P11247,P13516,P28293,P39039,Q61805,Q3UP87,P23611	0.00326084	0.3
GO:0050832	defense response to fungus	P	P08071,P11247,P28293	P08071,Q9QYY1,Q09014,Q3UP87,Q61176,Q9CQI6,P16858,P11247,Q9ESB3,P28293	0.00326084	0.3
GO:0031424	keratinization	P	Q9Z2K1,Q62267,Q8CGN8,Q3TTY5	O89094,Q9D709,Q62266,Q9Z2K1,Q9QWL7,O70456,Q62267,Q9Z331,P50446,Q9R269,Q8VHD8,P48997,Q08189,Q9D952,Q8CGN8,Q3TTY5,Q9JLF6,O70556,P18165,P10287	0.00326511	0.2
GO:0019838	growth factor binding	F	P11087,Q01149,P08121,P28481,O88207,P02463	Q61838,Q6PHU5,P25085,Q9QYY1,P47877,Q61581,Q07113,Q08857,P35441,P43406,Q8R422,Q8K4G1,A2ASQ1,Q63961,O88393,Q61810,P25444,Q9CZX8,P38647,P97352,Q61543,O35841,O70514,Q9QZF2,Q99N32,P27931,Q99PP9,Q61739,P63089,P05622,P97333,P26618,Q3UHX2,Q04857,P11087,Q01149,P08121,P28481,O88207,P02463,Q9CQS8,Q01279,Q9D823,O08992,O08999,P70424,P42703	0.003523	0.12766
GO:0061135	endopeptidase regulator activity	F	P35175,Q00897,Q61704,Q9D695,Q9CQV3,P35173,O08692,P08071	Q62426,P35175,P01027,Q00896,P22599,Q9JMA1,P21460,Q00897,Q61838,Q9WUP7,P28666,P28665,P01029,P06684,P97430,P70124,Q60854,Q9D154,P70296,P07759,P19324,P32261,Q91WP6,P97298,Q03734,P12388,Q5I2A0,Q9D7P9,O08800,Q8K1K6,Q61704,Q9ESB3,A6X935,Q61247,Q61702,Q07456,Q61703,Q8BYY9,P49182,Q63870,P97290,Q06770,Q80X76,Q7TMF5,P11859,Q8R422,Q8R121,Q9D695,Q9EPX2,P12023,Q8BJD1,Q9CQV3,Q2UY11,P35173,P56567,O08692,P29699,…	0.004054	0.0987654
GO:0044117	growth of symbiont in host	P	P51437,P11247,P28293	Q3B7Z2,P51437,P41317,Q08857,P11247,P13516,P28293,P39039,Q61805,Q3UP87,P23611	0.00437921	0.272727
GO:0044126	regulation of growth of symbiont in host	P	P51437,P11247,P28293	Q3B7Z2,P51437,P41317,Q08857,P11247,P13516,P28293,P39039,Q61805,Q3UP87,P23611	0.00437921	0.272727
GO:0044146	negative regulation of growth of symbiont involved in interaction with host	P	P51437,P11247,P28293	P51437,P41317,Q08857,P11247,P13516,P28293,P39039,Q61805,Q3UP87,P23611,P50446	0.00437921	0.272727
GO:0042737	drug catabolic process	P	O35744,Q91Z98,P12791,P02088,P11247,P49290,Q8C0L6	Q91WK5,O35744,Q91Z98,Q9D7Q1,Q8R242,Q62010,P47738,P28474,E9Q3E1,Q64437,P00329,Q80VQ0,P03958,Q61503,Q8CHR6,Q8BVI4,Q9WVL0,P35505,Q8K023,Q9JHR7,Q6P1B1,P49935,P09470,Q4PZA2,Q9DCJ9,O88958,Q9QZ08,Q9CRC9,P82343,Q8JZV7,O88986,Q8K3F7,Q8BH04,Q9Z2V4,Q9D2G2,Q64133,O88587,Q9CXI3,P33267,P12791,Q64462,P12790,Q05421,Q9Z0J4,P02088,P02089,P99029,O08709,Q61171,P35700,P01942,P06728,P11352,P24270,P46412,O08807,P11247,…	0.00519157	0.104478
GO:0004869	cysteine-type endopeptidase inhibitor	F	P35173,P35175,O08692,P08071	P51125,P99029,Q9D1X0,P31428,Q921Z5,P20108,O55042,O70201,Q64373,P18654,Q62426,P35173,P56567,P35175,O08692,P29699,P08071,P21460,O08677,Q5I2A0,Q9QXC1,Q9ESB3,Q3UE37	0.00553878	0.173913
GO:0048646	anatomical structure formation involved in morphogenesis	P	Q9Z2G9,P02463,Q9D1C9,P09803,Q03173,Q69ZR2,Q8C138,P24549,Q9WTK5,P28654,O08692,Q02566,Q3UHZ5,Q5XKE0,O70373,P51437,Q64314,P28481,P11087,O88207,Q3U962	Q8BI41,P56480,Q8VDD5,P07356,Q8BTM8,Q9QYB1,P09405,P31230,P49817,P15105,P82198,P21956,Q80UM3,P97449,P27601,P01831,Q61508,P11276,Q9ESB3,P32921,Q05793,P14901,Q9D868,P47811,O89110,P62746,Q08481,Q9CPT4,Q8BH43,Q9ESD7,Q8R2Y2,Q8BVF2,Q8VE70,P12815,P43406,O54781,P39061,O88597,P34152,Q8VHY0,P53690,Q3TAS6,Q9Z2G9,P33434,P20444,P16406,P97333,Q9D8B7,Q8K4G2,Q3U0S6,Q64429,Q63961,P97321,P08122,Q6ZPF4,Q3UH93,Q62178,…	0.0056831	0.0575342
GO:0044110	growth involved in symbiotic interaction	P	P51437,P11247,P28293	Q3B7Z2,P51437,P41317,Q08857,P11247,P13516,P28293,P39039,Q61805,Q3UP87,P23611,P50446	0.00570315	0.25
GO:0019731	antibacterial humoral response	P	P08071,P51437,P28293	Q91VE3,Q3UP87,Q8K0E8,E9PV24,P08071,P51437,P01592,P62892,P62862,P01868,P28293,P97430	0.00570315	0.25
GO:0044116	growth of symbiont involved in interaction with host	P	P51437,P11247,P28293	Q3B7Z2,P51437,P41317,Q08857,P11247,P13516,P28293,P39039,Q61805,Q3UP87,P23611,P50446	0.00570315	0.25
GO:0044144	modulation of growth of symbiont involved in interaction with host	P	P51437,P11247,P28293	Q3B7Z2,P51437,P41317,Q08857,P11247,P13516,P28293,P39039,Q61805,Q3UP87,P23611,P50446	0.00570315	0.25
GO:0038063	collagen-activated tyrosine kinase receptor signaling pathway	P	P11087,P02463	P11087,P08122,P02463,Q9QZS0	0.00584161	0.5
GO:0045103	intermediate filament-based process	P	Q9Z2K1,Q9CVD2,Q3TTY5,Q9Z2C5,Q9EPM5	Q6P5H2,P08551,P08553,P19246,Q9Z2K1,Q9QXS1,E9Q557,Q9R269,Q8R0W0,P15331,Q8BK63,Q9D952,Q148V8,Q9QXZ0,Q70IV5,Q9CVD2,P46660,P05784,Q91ZU6,Q9QWL7,P20152,P31001,Q9Z331,P50446,P02535,P11088,Q3TTY5,Q9R0H5,O54946,Q8VCW2,P03995,Q8K2K6,Q9Z2C5,Q61781,P97350,P08228,Q9ERR1,Q9EPM5	0.00670537	0.131579
GO:0099080	supramolecular complex	C	Q9Z2K1,Q61414,P28293,Q9EPM5,Q9CWF2,Q80XI6,Q920Q4,Q3UHZ5,Q02566,Q6IFZ6,Q3TTY5,A2AQP0,Q5XKE0,Q70KF4,P28654,Q9Z2C5,P11087,Q01149,P28481,P08121,O88207,Q3U962,P02463	O55042,Q61554,Q9QZJ6,Q9D1H9,C0HKD8,P55002,Q61555,P05977,P31001,P14602,P31786,Q9QXS1,P23927,P21460,P13541,P51667,Q9DC77,Q7TNV0,Q99LM3,P19123,Q9DBR7,P23242,Q08879,Q9R0Y5,P54823,P49935,Q61781,Q9Z2K1,Q9QWL7,P20152,Q61414,P63017,Q02257,Q922U2,Q01768,P15532,P15331,Q6IFX2,P08551,O55135,Q0VBK2,P08553,Q8VCW2,Q70IV5,Q99PS0,Q9Z320,P19246,Q99104,P28293,P05784,P03995,Q61765,Q9EPM5,A1L317,Q62168,Q8CCX5,B1AQ75,…	0.00694583	0.0547619
GO:0099081	supramolecular polymer	C	Q02566,Q3UHZ5,A2AQP0,Q9Z2K1,Q61414,P28293,Q9EPM5,Q9CWF2,Q80XI6,Q920Q4,Q6IFZ6,Q3TTY5,Q5XKE0,Q70KF4,P28654,Q9Z2C5,P11087,Q01149,P28481,P08121,O88207,Q3U962,P02463	O55042,Q61554,Q9QZJ6,Q9D1H9,C0HKD8,P55002,Q61555,P05977,P31001,P14602,P31786,Q9QXS1,P23927,P21460,P13541,P51667,Q9DC77,Q7TNV0,Q99LM3,P19123,Q9DBR7,P23242,Q08879,P58771,P63260,Q5SX39,P13542,Q9QUM9,O08638,A2ASS6,Q9JHJ0,Q91YR1,Q9Z0P5,Q91Z83,O09165,Q02566,P49813,Q9JLH8,Q9WV06,Q8BVA4,Q9JKK7,Q8BL65,Q80XB4,Q3UHZ5,Q80YT7,Q08481,A2AQP0,Q9R0Y5,P54823,P49935,Q61781,Q9Z2K1,Q9QWL7,P20152,Q61414,P63017,Q02257,…	0.00694583	0.0547619
GO:0005539	glycosaminoglycan binding	F	Q8BHC0,Q00547,P08071,P11247,P28293,O88207,P28654	O35658,P15379,Q8R4Y4,Q8BHC0,Q62059,Q00547,P48036,P97429,P51859,P63158,P08226,Q9JK53,P43275,P32261,P67984,Q01339,P08071,Q62009,P47915,P55302,Q61554,P11247,P19221,O70503,P56812,P06909,P21845,P11276,Q9ESB3,P35441,P06800,P49182,P29788,Q62356,P28293,P70202,O88207,Q61398,P05555,Q9JMD0,P13595,P63089,Q61092,Q8R121,Q99P91,Q5FW85,Q9Z1T2,P12023,P11152,Q3UP87,P97333,Q05895,Q8K4G2,A2A8L5,Q61245,Q03350,Q9Z0E2,…	0.00713879	0.0985915
GO:0031640	killing of cells of other organism	P	P51437,P28293,P08071	P60603,P19221,P16858,P51437,P41317,P39039,Q3UP87,Q09014,P28293,Q61176,Q9CZX8,P62889,P08071	0.00724192	0.230769
GO:0044364	disruption of cells of other organism	P	P08071,P51437,P28293	P16858,Q9CZX8,P62889,P08071,P60603,P19221,P51437,P41317,P39039,Q3UP87,Q09014,P28293,Q61176	0.00724192	0.230769
GO:0032653	regulation of interleukin-10 production	P	P49290,Q61878,Q64314	P49290,Q61878,P08101,Q9D659,Q9EP73,P63038,P20491,Q64314,O54885,Q18PI6,Q9EPB4,O08573,Q61735	0.00724192	0.230769
GO:0048729	tissue morphogenesis	P	P02463,Q03173,Q69ZR2,Q5TIS6,Q9Z2K1,P24549,O88207,Q8VEN2,Q2VIS4,Q5XKE0,Q02566,P08121,P09803	Q02248,P27601,Q63810,Q9JI11,P97333,Q0VBL3,Q63961,P02463,Q3UH93,O55222,Q9JJN6,P11859,Q811D0,P15379,Q61001,P97471,Q69Z28,P06745,P05132,Q9DBC7,Q9JMH6,Q9QXZ0,Q9QZH6,Q6DID7,Q8VHI3,Q9Z0E2,Q8BKG3,O88898,Q3TPX4,Q8K4E0,P30999,Q61789,O89110,P97478,Q9JIH2,B2RRD7,Q6VH22,P18760,Q8CHY6,P62962,P62082,Q9R0Q3,Q922D8,P63321,P70460,P70336,P68181,O35988,P58281,B2RXS4,Q3V3R1,P28660,P35288,Q03173,P34056,Q80U72,A2BH40,…	0.00834159	0.0673575
GO:0045111	intermediate filament cytoskeleton	C	Q9Z2K1,Q61414,P28293,Q9EPM5,Q6IFZ6,Q3TTY5,P27005	Q61781,Q9Z2K1,Q9QWL7,P20152,Q61414,P63017,Q02257,Q922U2,Q01768,P15532,P15331,Q6IFX2,P08551,O55135,Q0VBK2,P08553,Q8VCW2,Q70IV5,Q99PS0,Q9Z320,P19246,Q99104,P28293,P05784,P03995,Q61765,Q9EPM5,P23242,A1L317,Q62168,Q8CCX5,B1AQ75,Q91ZU6,Q6P5H2,Q9ERR1,P46660,P31001,P48678,P14733,P21619,P11531,P97333,Q8VED5,Q6IFZ6,P04104,Q9Z331,P50446,P02535,O89094,Q8R0W0,Q8BK63,P08730,Q3TTY5,Q9R0H5,Q148V8,Q9ERE2,P07744,…	0.00892122	0.0945946
GO:0097066	response to thyroid hormone	P	P10605,P97494,Q9CR84	P10605,P63242,Q6PIC6,P26043,P49935,O09172,P97494,Q9DCC8,Q9CR84,P48036,P45376,P07356,P04186,P17439	0.00900328	0.214286
GO:0030686	90S preribosome	C	Q5SSI6,Q9D1C9,Q810V0	O89110,Q8R3N1,Q5SSI6,Q8VCY6,Q8C4J7,Q8BU03,Q9D1C9,Q921Y2,Q810V0,Q9JJA4,Q8CBE3,Q9EQ61,Q8BVY0,Q5XG71	0.00900328	0.214286
GO:0038065	collagen-activated signaling pathway	P	P11087,P02463	P11087,P08122,P02463,Q9QZS0,P61622	0.0095321	0.4
GO:0006032	chitin catabolic process	P	O35744,Q91Z98	O35744,Q91Z98,Q9D7Q1,Q8R242,Q62010	0.0095321	0.4
GO:0002385	mucosal immune response	P	P08071,P51437	P06728,P08071,P51437,P62892,P62862	0.0095321	0.4
GO:0006030	chitin metabolic process	P	O35744,Q91Z98	O35744,Q91Z98,Q9D7Q1,Q8R242,Q62010	0.0095321	0.4
GO:0002227	innate immune response in mucosa	P	P08071,P51437	P06728,P08071,P51437,P62892,P62862	0.0095321	0.4
GO:0004568	chitinase activity	F	O35744,Q91Z98	Q9D7Q1,O35744,Q91Z98,Q8R242,Q62010	0.0095321	0.4
GO:0032753	positive regulation of interleukin-4 production	P	P49290,Q61878	P11609,P20491,P49290,Q61878,P28033	0.0095321	0.4
GO:0004028	3-chloroallyl aldehyde dehydrogenase activity	F	P47739,P24549	P47739,E9Q3E1,P24549,Q80VQ0,P47740	0.0095321	0.4
GO:0045992	negative regulation of embryonic development	P	O88207,Q3U962	Q02248,P05132,P68181,O88207,Q3U962	0.0095321	0.4
GO:0002251	organ or tissue specific immune response	P	P08071,P51437	P06728,P08071,P51437,P62892,P62862	0.0095321	0.4
GO:0072109	glomerular mesangium development	P	Q9D695,Q64314	Q9D695,O54890,Q8BUD0,P05622,Q64314	0.0095321	0.4
GO:0032673	regulation of interleukin-4 production	P	P49290,Q61878	P20491,P49290,Q61878,P28033,P11609	0.0095321	0.4
GO:0001944	vasculature development	P	Q9Z2G9,P11087,Q01149,P08121,O88207,P02463,Q8C138,P28654,O08692,Q69ZR2,P51437,Q64314,Q9D695,P82349	P56480,Q8VDD5,P07356,Q8BTM8,Q9QYB1,P09405,P31230,P49817,P15105,P82198,P21956,Q80UM3,P97449,P27601,P01831,Q61508,P11276,Q9ESB3,P32921,Q05793,P14901,Q9D868,P47811,O89110,P62746,Q08481,Q9CPT4,Q8BH43,Q9ESD7,Q8R2Y2,Q8BVF2,Q8VE70,P12815,P43406,O54781,P39061,O88597,P34152,Q8VHY0,P53690,Q3TAS6,Q9Z2G9,P33434,P20444,P16406,P97333,Q9D8B7,Q8K4G2,Q3U0S6,Q64429,Q63961,P97321,P08122,Q6ZPF4,Q3UH93,Q62178,E9Q555,…	0.0101644	0.0636364
GO:0072359	circulatory system development	P	Q9Z2G9,P11087,Q01149,P08121,O88207,P02463,Q5TIS6,Q8C138,O70373,P28481,Q69ZR2,Q9D6H2,Q02566,P28654,O08692,P51437,Q64314,Q5XKE0,P82349,Q9D695	P56480,Q8VDD5,P07356,Q8BTM8,Q9QYB1,P09405,P31230,P49817,P15105,P82198,P21956,Q80UM3,P97449,P27601,P01831,Q61508,P11276,Q9ESB3,P32921,Q05793,P14901,Q9D868,P47811,O89110,P62746,Q08481,Q9CPT4,Q8BH43,Q9ESD7,Q8R2Y2,Q8BVF2,Q8VE70,P12815,P43406,O54781,P39061,O88597,P34152,Q8VHY0,P53690,Q3TAS6,Q9Z2G9,P33434,P20444,P16406,P97333,Q9D8B7,Q8K4G2,Q3U0S6,Q64429,Q63961,P97321,P08122,Q6ZPF4,Q3UH93,Q62178,E9Q555,…	0.0103963	0.0554017
GO:0060429	epithelium development	P	P02463,Q03173,Q69ZR2,Q5TIS6,Q9Z2K1,P24549,Q3TTY5,P09803,P06795,O35465,Q62267,Q8CGN8,P10605,Q9DAW9,O88207,Q8VEN2,Q2VIS4,P28481,Q64314	Q02248,P27601,Q63810,Q9JI11,P97333,Q0VBL3,Q63961,P02463,Q3UH93,P24270,P18828,P30115,O35988,Q99JW5,Q811D0,O08691,Q62059,O55222,Q9JJN6,P11859,P15379,Q61001,P97471,Q69Z28,Q8BKG3,O88898,Q3TPX4,Q8K4E0,P30999,Q61789,A2ASS6,Q9R0Q3,O70548,Q8CBW3,P49769,P28660,Q9R0G7,Q9JHD2,B2RWS6,P97313,Q5NBX1,O89110,P97478,Q9JIH2,B2RRD7,Q6VH22,P18760,Q8CHY6,P62962,P62082,Q922D8,P05132,P63321,P70460,P70336,P68181,P58281,…	0.0104318	0.0563798
GO:0005882	intermediate filament	C	Q6IFZ6,Q3TTY5,Q9Z2K1,Q61414,P28293,Q9EPM5	P20152,P31001,P15331,P48678,P14733,P21619,O55135,P08551,P08553,P11531,P19246,P46660,P97333,Q61781,Q8VED5,Q6IFZ6,Q922U2,P04104,Q9Z331,P50446,P02535,O89094,Q8R0W0,Q0VBK2,Q8BK63,P08730,Q3TTY5,Q9R0H5,Q148V8,Q9ERE2,P07744,Q6IME9,Q3UV17,P05784,Q99M73,Q9Z2K1,Q9QWL7,Q61414,P63017,Q02257,Q01768,P15532,Q6IFX2,Q8VCW2,Q70IV5,Q99PS0,Q9Z320,Q99104,P28293,P03995,Q61765,Q9EPM5,P23242,A1L317,Q62168,Q8CCX5,B1AQ75,…	0.0108008	0.101695
GO:0002762	negative regulation of myeloid leukocyte differentiation	P	Q06180,Q9CXD9,P08071	Q60994,Q3TCH7,Q9ES52,Q8BKT7,Q06180,P12246,Q02248,Q61554,Q9CXD9,P26450,P08071,Q9Z0U1,Q01768,P15532,P25911	0.0109936	0.2
GO:0032613	interleukin-10 production	P	P49290,Q61878,Q64314	Q61735,P49290,Q61878,P08101,Q9D659,Q9EP73,P63038,P20491,Q64314,O54885,Q18PI6,Q9EPB4,O08573,Q00612,P28867	0.0109936	0.2
GO:0009620	response to fungus	P	P11247,P28293,P08071	Q64010,P11247,Q09014,Q3UP87,Q8CJ91,Q9CQI6,P16858,Q9ESB3,P28293,P08071,Q9QYY1,Q61176,P35991,O08734,Q99J83	0.0109936	0.2
GO:0061134	peptidase regulator activity	F	P35175,Q00897,Q61704,Q9D695,Q9CQV3,P35173,O08692,P08071	Q62426,P35175,P01027,Q00896,P22599,Q9JMA1,P21460,Q00897,Q61838,Q9WUP7,P28666,P28665,P01029,P06684,P97430,P70124,Q60854,Q9D154,P70296,P07759,P19324,P32261,Q91WP6,P97298,Q03734,P12388,Q5I2A0,Q9D7P9,O08800,Q8K1K6,Q61704,Q9ESB3,A6X935,Q61247,Q61702,Q07456,Q61703,Q8BYY9,P49182,Q63870,P97290,Q06770,Q80X76,Q7TMF5,P11859,Q8R422,Q8R121,Q9D695,Q9EPX2,P12023,Q8BJD1,Q9CQV3,Q2UY11,P35173,P56567,O08692,P29699,…	0.0111738	0.0833333
GO:0072358	cardiovascular system development	P	Q9Z2G9,P11087,Q01149,P08121,O88207,P02463,Q8C138,P28654,O08692,Q69ZR2,P51437,Q64314,Q9D695,P82349	P56480,Q8VDD5,P07356,Q8BTM8,Q9QYB1,P09405,P31230,P49817,P15105,P82198,P21956,Q80UM3,P97449,P27601,P01831,Q61508,P11276,Q9ESB3,P32921,Q05793,P14901,Q9D868,P47811,O89110,P62746,Q08481,Q9CPT4,Q8BH43,Q9ESD7,Q8R2Y2,Q8BVF2,Q8VE70,P12815,P43406,O54781,P39061,O88597,P34152,Q8VHY0,P53690,Q3TAS6,Q9Z2G9,P33434,P20444,P16406,P97333,Q9D8B7,Q8K4G2,Q3U0S6,Q64429,Q63961,P97321,P08122,Q6ZPF4,Q3UH93,Q62178,E9Q555,…	0.0113751	0.0627803
GO:0099512	supramolecular fiber	C	Q02566,Q3UHZ5,Q9Z2K1,Q61414,P28293,Q9EPM5,Q9CWF2,Q80XI6,Q920Q4,Q6IFZ6,Q3TTY5,A2AQP0,Q5XKE0,Q70KF4,P28654,Q9Z2C5,P11087,Q01149,P28481,P08121,O88207,Q3U962	Q61554,Q9QZJ6,Q9D1H9,C0HKD8,P55002,Q61555,P05977,P31001,P14602,P31786,Q9QXS1,P23927,P21460,P13541,P51667,Q9DC77,Q7TNV0,Q99LM3,P19123,Q9DBR7,P23242,Q08879,P58771,P63260,Q5SX39,P13542,Q9QUM9,O08638,A2ASS6,Q9JHJ0,Q91YR1,Q9Z0P5,Q91Z83,O09165,Q02566,P49813,Q9JLH8,Q9WV06,Q8BVA4,Q9JKK7,Q8BL65,Q80XB4,Q3UHZ5,Q80YT7,Q08481,Q9R0Y5,P54823,P49935,Q61781,Q9Z2K1,Q9QWL7,P20152,Q61414,P63017,Q02257,Q922U2,Q01768,…	0.012891	0.0526316
GO:0061436	establishment of skin barrier	P	Q9Z2K1,Q2VIS4,Q5U405	Q9Z2K1,O70456,P04104,P54227,Q8VHD8,P11088,Q2VIS4,Q5MPP0,O88551,Q9JLJ5,O35054,O88898,Q99KY4,Q9D709,Q5U405,P16056	0.0132178	0.1875
GO:0043901	negative regulation of multi-organism process	P	P08071,P51437,P11247,P28293,Q8CAK3,Q61216	Q61171,P08071,Q8R0K2,P51437,P41317,Q08857,P11247,P13516,P28293,P39039,Q61805,Q3UP87,P23611,O35658,P60670,P70362,Q3TL44,O09106,Q921F2,Q8C5L6,P50446,P07356,Q9QY76,Q9WV55,P12246,O54962,Q99J93,Q9Z1X4,O70551,Q8R2Q8,O54781,P97430,Q8VCF0,Q99J72,Q8CAK3,Q8CIE4,Q62318,Q3TYA6,P13020,O70492,P70388,Q61510,Q80VI1,Q61216,P42225,Q61990,P36993,P12804,Q8VCM5,P03958,Q9R160,Q8VDQ8,O08691,P14211,Q61599,Q60953,Q9CQ10,…	0.0136288	0.0967742
GO:0035313	wound healing, spreading of epidermal cells	P	O88207,Q8VEN2	Q80TV8,Q9JLN9,O88207,P11688,Q8VEN2,P34960	0.0139994	0.333333
GO:0043589	skin morphogenesis	P	P11087,Q01149	P11087,Q01149,Q7TPC1,P17439,P49769,O88898	0.0139994	0.333333
GO:0071636	positive regulation of transforming growth factor beta production	P	Q9D695,Q64314	P51885,Q9D695,P35441,Q61247,Q64314,O54901	0.0139994	0.333333
GO:0005540	hyaluronic acid binding	F	Q8BHC0,Q00547	O35658,P15379,Q8R4Y4,Q8BHC0,Q62059,Q00547	0.0139994	0.333333
GO:0015669	gas transport	P	P55088,P02088	P00920,Q02013,Q8CI85,P55088,P02088,P04247	0.0139994	0.333333
GO:0042759	long-chain fatty acid biosynthetic process	P	P39654,P60202	P39654,Q91V12,Q9QYS9,P60202,Q99PU5,Q99104	0.0139994	0.333333
GO:0097512	cardiac myofibril	C	A2AQP0,Q3UHZ5	P31001,P14602,P23927,P51667,A2AQP0,Q3UHZ5	0.0139994	0.333333
GO:0045722	positive regulation of gluconeogenesis	P	P56212,Q06180	P61965,Q9JHD2,Q3U1J4,P56212,Q6P2K6,Q06180	0.0139994	0.333333
GO:0001568	blood vessel development	P	Q9Z2G9,P02463,Q8C138,P28654,O08692,Q69ZR2,P51437,Q64314,P08121,Q9D695,P11087,Q01149,O88207	P56480,Q8VDD5,P07356,Q8BTM8,Q9QYB1,P09405,P31230,P49817,P15105,P82198,P21956,Q80UM3,P97449,P27601,P01831,Q61508,P11276,Q9ESB3,P32921,Q05793,P14901,Q9D868,P47811,O89110,P62746,Q08481,Q9CPT4,Q8BH43,Q9ESD7,Q8R2Y2,Q8BVF2,Q8VE70,P12815,P43406,O54781,P39061,O88597,P34152,Q8VHY0,P53690,Q3TAS6,Q9Z2G9,P33434,P20444,P16406,P97333,Q9D8B7,Q8K4G2,Q3U0S6,Q64429,Q63961,P97321,P08122,Q6ZPF4,Q3UH93,Q62178,E9Q555,…	0.0150517	0.0625
GO:0050829	defense response to Gram-negative bacterium	P	P08071,P51437,P28293	Q3UP87,P19221,Q9CZX8,P62889,Q9EPB4,P30681,P08071,P51437,P08905,P01872,Q9QZ85,P60603,P28293,Q9D8T2,Q61805,Q8BV57,A1L314	0.0156798	0.176471
GO:0009653	anatomical structure morphogenesis	P	P09803,P28481,Q9Z2G9,P02463,Q9D1C9,Q03173,Q69ZR2,Q5TIS6,P11087,Q9Z2K1,Q8C138,P24549,Q9WTK5,O70373,O88207,Q62267,P28654,O08692,Q60596,Q02566,Q3UHZ5,Q5XKE0,Q6PCQ0,Q8VEN2,Q64314,Q01149,P51437,Q9CR84,Q3U962,Q2VIS4,F8VPU2,P08071,P08121,Q9Z2C5,Q80YA3,P08207,Q9CWF2	Q8BI41,P47757,Q9QUI0,P40124,Q8BK63,P09803,Q9WTR5,Q06890,O35955,Q9JLV5,P47811,Q9JI11,Q9CYT6,Q9EQG9,Q9QYC0,Q8BRF7,Q7TMB8,Q9Z0M5,Q62011,Q9EPK2,P28660,Q9JLI8,Q01279,Q8BKT7,Q3TKT4,P10287,P49222,B1AZI6,Q8K330,Q8VCN9,P55288,Q62280,Q9Z1M0,Q60875,P46938,Q8K1X4,Q8VDD5,Q02248,Q61292,P28481,Q61245,P03966,P56480,P07356,Q8BTM8,Q9QYB1,P09405,P31230,P49817,P15105,P82198,P21956,Q80UM3,P97449,P27601,P01831,Q61508,…	0.0156859	0.045067
GO:0016620	oxidoreductase activity, acting on the aldehyde or oxo group of donors, NAD or NADP as acceptor	F	P24549,P47739,Q8BWF0,Q9Z2G9	P45376,P45377,Q8K023,P24549,Q99LB2,P47739,E9Q3E1,Q80VQ0,P47740,P47738,Q9JLJ2,Q8CHT0,Q8R0Y6,Q9DBF1,Q9Z110,P16858,Q9EQ20,Q9Z2I8,Q8BWF0,P28474,Q9QYF1,Q60597,O08749,P35486,Q9D051,Q8BMF4,Q8BKZ9,Q7TNT2,Q922J9,Q571I9,Q9Z2G9	0.0161516	0.129032
GO:0035305	negative regulation of dephosphorylation	P	F8VPU2,Q810V0,Q70KF4,P56212	P61022,Q5SYD0,Q6P9Q6,F8VPU2,Q6NZN0,Q810V0,Q5ND34,O08856,P83741,Q66JQ7,P58389,P26883,Q8BH58,Q6R891,Q70KF4,P62259,Q9CQV8,Q61249,P60840,P56212,Q8R3G1,P70336,P70335,P97434,O88351,Q8K1X4,Q6A028,P08752,Q8CI61,Q9JKF1,Q8C5L6	0.0161516	0.129032
GO:0045214	sarcomere organization	P	Q5XKE0,Q02566,O70373,Q3UHZ5	P70288,E9Q394,B2RWS6,P51637,P58771,P45591,P63260,Q9JI91,Q9JK37,P97315,Q5XKE0,A2ASS6,O88342,Q9QZ47,Q62234,P50462,Q9JKS4,A2AUC9,A2ABU4,O09165,O70548,Q9DBC7,Q02566,P09055,O70373,Q9JJW5,O88346,O09161,P97314,Q8BWB1,Q5DTJ9,Q3UHZ5	0.0180107	0.125
GO:0003007	heart morphogenesis	P	Q5TIS6,Q5XKE0,Q02566,O70373,P28481,O88207	Q9R0Q3,P49769,Q5TIS6,P23242,Q63961,O35516,Q6VH22,P46938,E9Q401,Q9EPC1,P97333,P97471,O70421,Q8BVE8,O88393,P47941,O55222,E9PZQ0,P35441,P46935,Q3TKT4,P34056,Q3UH93,Q00493,Q5I1X5,Q9QXX0,Q9ES00,A2AJK6,E9Q557,Q02248,P68033,Q5XKE0,A2ASS6,Q62234,A2ABU4,O70548,Q8VCR8,Q4U4S6,Q02566,P58771,P09542,Q91Z83,P26883,P51667,P19123,Q61245,Q99P72,O70433,P51637,Q00724,Q0VBL3,Q9WVB4,Q6DVA0,Q61823,Q80SZ7,Q8BTM8,Q80W54,…	0.0181548	0.0909091
GO:0032964	collagen biosynthetic process	P	Q9D695,P11087,O88207	P62835,P05201,Q9CX80,Q99K41,P20152,P99029,P19221,Q61247,Q9D695,P05622,Q63961,B2RWS6,P19324,P11087,Q8BH97,O88207,Q8CG70,Q61176	0.0183823	0.166667
GO:0042744	hydrogen peroxide catabolic process	P	P02088,P11247,P49290	O55042,Q61646,P02088,P02089,P99029,O08709,Q61171,P35700,P01942,P06728,P11352,P24270,P46412,O08807,P11247,Q9JMH6,P49290,P20108	0.0183823	0.166667
GO:0045671	negative regulation of osteoclast differentiation	P	P08071,Q9CXD9	P08071,Q61554,Q9Z0U1,Q02248,Q9ES52,Q9CXD9,P26450	0.0191908	0.285714
GO:0032693	negative regulation of interleukin-10 production	P	P49290,Q61878	O54885,Q18PI6,P49290,Q61878,P08101,Q9D659,Q9EP73	0.0191908	0.285714
GO:0002138	retinoic acid biosynthetic process	P	P24549,O54909	P24549,O54909,P00184,Q8K023,Q8VCH7,Q00915,P22935	0.0191908	0.285714
GO:0032007	negative regulation of TOR signaling	P	Q9D1F4,Q9Z2C5	Q9WV60,Q9D1F4,P12815,Q5EG47,Q570Y9,Q6WKZ8,Q9Z2C5	0.0191908	0.285714
GO:0008061	chitin binding	F	O35744,Q91Z98	O35744,Q61362,Q91Z98,Q922Q9,Q9D7Q1,Q8R242,Q62010	0.0191908	0.285714
GO:0097067	cellular response to thyroid hormone stimulus	P	P97494,P10605	O09172,P97494,P10605,P63242,Q6PIC6,P26043,P49935	0.0191908	0.285714
GO:0016102	diterpenoid biosynthetic process	P	P24549,O54909	Q00915,P22935,P24549,Q8VCH7,O54909,P00184,Q8K023	0.0191908	0.285714
GO:0032633	interleukin-4 production	P	P49290,Q61878	P20491,P49290,Q61878,P28033,P11609,Q61730,O35516	0.0191908	0.285714
GO:0005200	structural constituent of cytoskeleton	F	Q9Z2K1,Q62267,Q9CWF2,Q5XKE0,Q8CJ40	Q99K51,P60710,P63260,P28652,P46660,P08551,P19246,Q9Z2K1,Q9CPW4,P58771,P20152,P58774,Q62267,P31001,Q9QXS1,P05213,P68373,P68368,Q7TMM9,Q9CWF2,P68372,Q5XKE0,A2ASS6,Q62261,Q9CVB6,Q99JY9,Q9JJZ2,P59999,P26039,Q62234,P99024,Q9D6F9,Q9ERD7,Q922F4,P61161,Q9JM76,Q9WV32,Q71LX4,P15508,Q70IV5,Q9QYB5,A2AQ07,Q9QYC0,P03995,G5E8K5,P18165,Q9WV92,P83887,Q8CJ40	0.0192465	0.102041
GO:0031430	M band	C	Q5XKE0,Q3UHZ5,Q70KF4	P05064,P14602,P23927,Q5XKE0,A2ASS6,Q62261,Q62234,P56565,O70433,A2AUC9,A2ABU4,Q9DC77,A2AAJ9,Q6PD03,Q99LM3,Q3URD3,Q02357,Q3UHZ5,Q70KF4	0.0213268	0.157895
GO:0002009	morphogenesis of an epithelium	P	P02463,Q03173,Q69ZR2,Q5TIS6,P24549,O88207,Q8VEN2,Q2VIS4,P09803,Q9Z2K1	Q02248,P27601,Q63810,Q9JI11,P97333,Q0VBL3,Q63961,P02463,Q3UH93,O55222,Q9JJN6,P11859,Q811D0,P15379,Q61001,P97471,Q69Z28,Q8BKG3,O88898,Q3TPX4,Q8K4E0,P30999,Q61789,O89110,P97478,Q9JIH2,B2RRD7,Q6VH22,P18760,Q8CHY6,P62962,P62082,Q9R0Q3,Q922D8,P05132,P63321,P70460,P70336,P68181,O35988,P58281,B2RXS4,Q3V3R1,P28660,P35288,Q03173,P34056,Q80U72,A2BH40,Q69ZR2,Q9R0G7,Q91YM2,Q5NBX1,Q9JHD2,P49769,Q5TIS6,P23242,…	0.0220043	0.0662252
GO:0001676	long-chain fatty acid metabolic process	P	P39654,P12791,Q8C138,P60202	O35678,Q63844,P55249,P39654,Q91WC9,Q64429,P47713,Q99N16,Q9EP75,P22437,P33267,P12791,P12790,Q05421,P51174,P48410,P54310,Q8C138,Q9QYS9,P60202,Q99PU5,Q99104,P34914,Q91V12,P41216,O55137,Q8JZR0,Q8JZN5,Q91VE0,Q9QYR9,Q08857,Q60714,P97742,O88561	0.0221151	0.117647
GO:0001503	ossification	P	P11087,P28481,Q01149,P39654,P08071,Q3U962,Q9CXD9	P84089,Q08024,P11087,O70433,P23242,Q99P91,O70624,P28301,P09450,Q8BHE5,Q9Z0E2,P97471,O88393,Q64739,P55097,P33434,P63094,Q05793,P28481,Q8R2H9,Q80V26,P53690,Q91WT9,A2AAY5,Q80Z71,Q9Z2V6,P63085,Q63844,P47811,Q3V1T4,Q99MQ4,Q01149,Q80W54,Q9DAV9,P39654,P63089,P70122,P14234,Q7TNB8,Q61508,Q91Z96,G5E829,Q8BI84,Q6P9J9,Q9Z1M0,P48614,P34056,P35803,Q61555,Q8VHN7,P29699,Q61810,Q9QUI0,E9PZQ0,Q05895,Q811B1,Q9D1D6,…	0.0242775	0.0777778
GO:1901072	glucosamine-containing compound catabolic process	P	O35744,Q91Z98	O35744,Q91Z98,Q9D7Q1,Q8R242,Q62010,O88958,Q9CRC9,Q8JZV7	0.025056	0.25
GO:0002369	T cell cytokine production	P	Q3U108,Q99JH8	Q9D659,P70387,P01887,Q61176,P35762,Q3U108,Q811D0,Q99JH8	0.025056	0.25
GO:0036075	replacement ossification	P	P11087,P28481	P11087,P63094,Q05793,P28481,Q8R2H9,Q80V26,P53690,Q91WT9	0.025056	0.25
GO:0001958	endochondral ossification	P	P11087,P28481	P11087,P63094,Q05793,P28481,Q8R2H9,Q80V26,P53690,Q91WT9	0.025056	0.25
GO:0090141	positive regulation of mitochondrial fission	P	P28654,Q80YA3	P28654,Q9CQ92,Q9EQH3,Q8K1M6,Q6PCP5,Q3KNM2,Q8VCM5,Q80YA3	0.025056	0.25
GO:0001101	response to acid chemical	P	P11087,Q01149,P09803,P08121,Q3U962,O88508,P02463,P97494,Q9CR84	P45376,P11531,P40240,Q64471,Q9JJK2,P24270,Q05421,Q04857,P11087,Q01149,O08529,Q9D1L9,P09803,Q60668,P16460,P08121,Q99K70,Q8BKC5,Q8BMJ2,O88653,P28862,P28033,Q64373,Q3U962,Q80X95,Q01279,O88508,P13864,P33434,Q8BLX7,P26618,P02463,Q9JLN9,Q64430,Q61024,P00329,Q9JM51,O35609,P49935,Q00724,P23242,Q9D7E3,P47877,P56528,Q07113,Q8CHC4,P19157,P09671,P07214,P41216,Q9D2R0,Q6R891,O88393,Q00899,P18760,Q9QUI0,P10518,…	0.0257691	0.0676692
GO:0008202	steroid metabolic process	P	Q9D0S9,Q9ERY9,P50172,Q8VBT6,P52019,E9Q4S1,P12791,O54909	Q9CY27,Q8K0C4,P32020,Q8BMP6,Q8BLN5,P46656,Q9EQ06,Q9D0S9,Q9D665,P00184,O35469,P27786,Q9QZ82,P08226,Q00623,P06728,Q00612,P58044,Q9DCN2,Q8JZK9,Q920E5,Q8VCT4,Q8VCH6,Q9R1J0,Q3U9G9,Q99JF5,O88736,O88455,P53798,Q9R008,P54869,Q5EG47,Q91WG1,Q9ERY9,O09174,Q60991,Q9DBG1,Q61009,O70503,P50171,P50172,Q8K023,Q6ZQM8,P68510,Q9WV54,Q64213,Q61581,P24270,Q9Z0J0,Q8BFZ9,P34928,Q9ERG0,P33622,Q91X78,Q8VDJ3,P09813,P52430,…	0.0261447	0.0714286
GO:0051187	cofactor catabolic process	P	Q9DCN1,P02088,P11247,P49290	Q09014,Q9CWD3,O70145,Q9DCN1,Q9Z2A9,O70252,P14901,Q8R0Y6,Q99P30,P50247,P48410,Q91V12,Q923D2,Q9CY64,Q99N16,Q8K354,P02088,P02089,P99029,O08709,Q61171,P35700,P01942,P06728,P11352,P24270,P46412,O08807,P11247,Q9JMH6,P49290,P20108,Q8QZT1,Q01853,O55042,Q61646	0.0267473	0.111111
GO:0019730	antimicrobial humoral response	P	P08071,P51437,P28293	Q91VE3,Q3UP87,P08071,P51437,P01592,P62892,P62862,P01868,P28293,P97430,Q9QYY1,Q8K0E8,E9PV24,P16858,Q9CZX8,P50446,P62889,P31725,P19221,Q9ESB3,P60603	0.0279442	0.142857
GO:0061448	connective tissue development	P	P28481,Q3U108,O88207,P11087,Q9D695,Q64314	P47811,P28481,Q61245,P03966,P82198,Q05793,O70362,P97863,Q3U108,P20444,P48614,Q925H1,Q64739,Q61508,Q8BI84,Q80V26,P07356,P35441,Q80W54,Q05895,P14824,P37040,Q9WVG6,Q04857,Q60847,Q02788,P41317,Q80X19,Q63870,Q8R2Z5,O08746,P19324,Q60604,Q61543,Q7TQ95,Q02248,Q8BPB5,Q61810,Q04207,O88207,P51885,Q63844,P63094,Q80WW9,Q4VBD2,O88939,Q8BHE5,B2RWS6,Q64430,P11087,Q91WT9,Q9D0K2,Q8QZT1,Q9JKV1,Q8BHJ5,P30285,Q9D2R0,…	0.028376	0.0821918
GO:0001501	skeletal system development	P	P28481,P11087,Q3U108,Q9CXD9,P08071,Q01149,P08121,Q9D6H2,Q3U962	P47811,P28481,Q61245,P03966,P11087,P63094,Q05793,Q8R2H9,Q80V26,P53690,Q91WT9,P82198,O70362,P97863,Q3U108,P20444,P48614,Q925H1,Q64739,Q61508,Q8BI84,P07356,P35441,Q80W54,Q05895,P14824,P37040,Q9WVG6,Q04857,Q60847,Q02788,P41317,Q80X19,Q63870,Q8R2Z5,O08746,P19324,Q60604,Q61543,Q7TQ95,Q02248,Q8BPB5,Q61810,Q04207,Q6P9J9,P29351,Q8CBW3,Q8BH43,P35235,O70172,P59016,B2RWS6,P63005,P05480,Q9QUI0,E9PZQ0,Q811B1,…	0.0292437	0.0661765
GO:0045104	intermediate filament cytoskeleton organization	P	Q3TTY5,Q9Z2C5,Q9Z2K1,Q9CVD2	Q6P5H2,P08551,P08553,P19246,Q9QWL7,P20152,P31001,Q9Z331,P50446,P02535,E9Q557,Q8R0W0,P11088,Q3TTY5,Q9R0H5,O54946,Q8VCW2,P03995,Q8K2K6,Q9Z2C5,Q61781,P97350,P08228,P46660,Q9ERR1,Q9Z2K1,Q9QXS1,Q9R269,P15331,Q8BK63,Q9D952,Q148V8,Q9QXZ0,Q70IV5,Q9CVD2,P05784,Q91ZU6	0.0292652	0.108108
GO:0007605	sensory perception of sound	P	P11087,P09803,P28481,P55088	P55012,Q61245,Q8VIM6,Q8VHN7,P08228,Q60854,Q9JJI8,O88342,P11352,P11087,P70441,Q61207,Q6URW6,P09803,P20060,P04370,P13597,O08808,P70677,Q64331,P29416,Q99K30,P28481,P39447,Q920R6,P56695,Q810U5,Q3UUQ7,P56564,A1Y9I9,P34056,P55088,Q8BHJ7,Q99KW3,Q8K4E0,Q64739,A2AJK6	0.0292652	0.108108
GO:0030684	preribosome	C	Q9D0I8,Q5SSI6,Q810V0,Q9D1C9	Q8BVY0,Q5XG71,O55135,Q9D903,Q9D0I8,Q9CYH6,Q9CXK8,Q8VCG3,Q9JJA4,Q91VY9,Q9CR47,Q8CBE3,Q9EQ61,A2BE28,Q91YU8,Q9DBE9,O54825,Q5SWD9,P62082,P35550,Q9D0T1,Q9D6Z1,Q6DFW4,Q5SSI6,Q921Y2,Q8VCY6,Q9DB96,Q9Z0H1,Q8C4J7,Q91WM3,Q810V0,Q8R3N1,Q8BU03,Q640M1,O89110,Q9D1C9,Q9CWW6	0.0292652	0.108108
GO:0016903	oxidoreductase activity, acting on the aldehyde or oxo group of donors	F	P24549,P47739,Q8BWF0,Q9Z2G9	P45376,P45377,Q8K023,P24549,Q99LB2,P50136,Q6P3A8,P47739,E9Q3E1,Q80VQ0,P47740,P47738,Q9JLJ2,Q8CHT0,Q8R0Y6,Q3TYQ9,Q64437,G3X982,Q9DBF1,Q9Z110,P16858,Q9EQ20,Q60597,P35486,Q9D051,P35487,Q9Z2I8,Q8BWF0,Q571I9,Q9Z2G9,P28474,Q9QYF1,O08749,Q8BMF4,Q8BKZ9,Q7TNT2,Q922J9	0.0292652	0.108108
GO:0009887	animal organ morphogenesis	P	P28481,Q5TIS6,P11087,P24549,O70373,O88207,Q64314,Q01149,Q3U962,Q5XKE0,Q02566,P08071,P08121,P09803	P47811,P28481,Q61245,P03966,Q02248,O55222,Q9JJN6,P11859,Q811D0,P15379,Q61001,P97471,Q69Z28,P42227,Q9R0Q3,P49769,Q5TIS6,P23242,Q63961,O35516,Q6VH22,P11087,P63094,Q05793,Q8R2H9,Q80V26,P53690,Q91WT9,P24549,Q9JLB9,P34056,Q9JKF6,P63001,Q80U72,Q8BTM8,A2ASS6,P26883,P51667,Q80W54,O70373,Q9EQG9,O88207,Q6A026,Q8BWB1,P70699,Q9JLN9,Q9WU42,A2AJK6,P46938,E9Q401,Q9EPC1,P97333,O70421,Q8BVE8,O88393,P47941,E9PZQ0,…	0.0306162	0.055336
GO:0051852	disruption by host of symbiont cells	P	P51437,P28293	P19221,P16858,P51437,P41317,P39039,Q3UP87,Q09014,P28293,Q61176	0.0315471	0.222222
GO:0051546	keratinocyte migration	P	Q9Z2K1,Q3TTY5	Q8R0W0,Q8R001,P62331,P97820,P41245,Q8R0S2,Q9JLN9,Q9Z2K1,Q3TTY5	0.0315471	0.222222
GO:0051883	killing of cells in other organism involved in symbiotic interaction	P	P51437,P28293	P19221,P16858,P51437,P41317,P39039,Q3UP87,Q09014,P28293,Q61176	0.0315471	0.222222
GO:0072012	glomerulus vasculature development	P	Q64314,Q9D695	Q64314,Q08481,O35516,Q9D695,O54890,Q8BUD0,P05622,Q02013,P26618	0.0315471	0.222222
GO:0051818	disruption of cells of other organism involved in symbiotic interaction	P	P51437,P28293	P19221,P16858,P51437,P41317,P39039,Q3UP87,Q09014,P28293,Q61176	0.0315471	0.222222
GO:0051873	killing by host of symbiont cells	P	P28293,P51437	P19221,Q3UP87,Q09014,P28293,Q61176,P16858,P51437,P41317,P39039	0.0315471	0.222222
GO:0030280	structural constituent of epidermis	F	Q2VIS4,Q3TTY5	Q62266,P04104,Q8VHD8,P11088,Q2VIS4,Q3TTY5,Q99M73,P18165,B1AQ75	0.0315471	0.222222
GO:0043394	proteoglycan binding	F	P10605,P28481,O88207	P63089,A2A8L5,P08226,Q6PIC6,P06909,Q9ESB3,P06800,P05555,P11152,A2ASQ1,Q80YX1,Q99P91,O08992,Q9Z0E2,P10605,O70370,P10493,P11276,P28481,O88207,P55097,Q80U63	0.0316158	0.136364
GO:0010923	negative regulation of phosphatase activity	P	Q70KF4,F8VPU2,Q810V0	P58389,P26883,Q8BH58,Q6R891,Q70KF4,P70336,P70335,P97434,O88351,Q8K1X4,P08752,Q8CI61,P61022,Q5SYD0,Q6P9Q6,F8VPU2,Q6NZN0,Q810V0,Q5ND34,O08856,P83741,Q66JQ7	0.0316158	0.136364
GO:0007033	vacuole organization	P	P18242,Q3TBT3,Q9R0M3,P63082,Q920Q4,Q9Z2C5	P62821,P51150,Q9CZ44,P18242,Q9ER00,Q9JLV1,Q8R317,Q9QZM0,Q9DCD6,Q91VR7,Q60766,Q9CPX6,P49769,Q9D906,Q99J83,Q91YE8,Q0KL01,Q8R3E3,O88597,Q91VM3,P35288,Q8K1A5,Q3TBT3,Q9CR39,Q6PF93,Q91YI1,Q99KU0,Q6P4T0,O89053,Q9R0M3,Q9Z1M0,Q9EQH3,P20060,O88531,Q8BUK6,P17439,P28798,P29416,Q9Z266,O89023,Q9D7S9,P24638,Q8R307,Q8BIL5,P70699,Q7TMK6,Q69ZN6,P41233,P63082,Q5SYH2,Q920Q4,Q80U63,P52875,Q5KU39,Q9Z2C5,P07356,Q64008,…	0.0318761	0.08
GO:0031214	biomineral tissue development	P	Q01149,P39654,P11087,P08071	Q99MQ4,Q01149,Q80W54,Q9DAV9,P39654,P63089,Q99P91,P70122,P14234,P28301,Q7TNB8,Q61508,Q8R2H9,P23242,Q91Z96,G5E829,Q8BI84,Q6P9J9,Q9Z1M0,P48614,P34056,P35803,Q61555,Q8VHN7,P29699,Q61810,P11087,Q4ZJM7,P70302,Q9JKF6,D3YYM4,P28033,O88990,P08071,P07356,Q148V8,O08970,Q9ERA6	0.0319193	0.105263
GO:0003332	negative regulation of extracellular matrix constituent secretion	P	Q8C138	Q8C138	0.0319709	1
GO:0033257	Bcl3/NF-kappaB2 complex	C	Q9WTK5	Q9WTK5	0.0319709	1
GO:0072254	metanephric glomerular mesangial cell differentiation	P	Q64314	Q64314	0.0319709	1
GO:0061709	reticulophagy	P	Q3TBT3	Q3TBT3	0.0319709	1
GO:1902215	negative regulation of interleukin-4-mediated signaling pathway	P	Q06180	Q06180	0.0319709	1
GO:0052902	spermidine:oxygen oxidoreductase (3-aminopropanal-forming) activity	F	Q8C0L6	Q8C0L6	0.0319709	1
GO:1903564	regulation of protein localization to cilium	P	Q8CJ40	Q8CJ40	0.0319709	1
GO:1902206	negative regulation of interleukin-2-mediated signaling pathway	P	Q06180	Q06180	0.0319709	1
GO:1901256	regulation of macrophage colony-stimulating factor production	P	Q64314	Q64314	0.0319709	1
GO:2000554	regulation of T-helper 1 cell cytokine production	P	Q3U108	Q3U108	0.0319709	1
GO:0046208	spermine catabolic process	P	Q8C0L6	Q8C0L6	0.0319709	1
GO:0090362	positive regulation of platelet-derived growth factor production	P	Q9D695	Q9D695	0.0319709	1
GO:0002268	follicular dendritic cell differentiation	P	Q9WTK5	Q9WTK5	0.0319709	1
GO:0051499	D-aminoacyl-tRNA deacylase activity	F	Q9DD18	Q9DD18	0.0319709	1
GO:0046900	tetrahydrofolylpolyglutamate metabolic process	P	Q9Z0L8	Q9Z0L8	0.0319709	1
GO:0060168	positive regulation of adenosine receptor signaling pathway	P	Q8CE08	Q8CE08	0.0319709	1
GO:2000318	positive regulation of T-helper 17 type immune response	P	Q3U108	Q3U108	0.0319709	1
GO:1990414	replication-born double-strand break repair via sister chromatid exchange	P	Q60596	Q60596	0.0319709	1
GO:1900190	regulation of single-species biofilm formation	P	P08071	P08071	0.0319709	1
GO:0032714	negative regulation of interleukin-5 production	P	P49290	P49290	0.0319709	1
GO:0003845	11-beta-hydroxysteroid dehydrogenase [NAD(P)] activity	F	P50172	P50172	0.0319709	1
GO:0032980	keratinocyte activation	P	Q3TTY5	Q3TTY5	0.0319709	1
GO:0001162	RNA polymerase II intronic transcription regulatory region sequence-specific DNA binding	F	Q5TIS6	Q5TIS6	0.0319709	1
GO:0005586	collagen type III trimer	C	P08121	P08121	0.0319709	1
GO:0030021	extracellular matrix structural constituent conferring compression resistance	F	P28654	P28654	0.0319709	1
GO:1903566	positive regulation of protein localization to cilium	P	Q8CJ40	Q8CJ40	0.0319709	1
GO:1901307	positive regulation of spermidine biosynthetic process	P	Q8C0L6	Q8C0L6	0.0319709	1
GO:0002148	hypochlorous acid metabolic process	P	P11247	P11247	0.0319709	1
GO:0001002	RNA polymerase III type 1 promoter sequence-specific DNA binding	F	Q8K284	Q8K284	0.0319709	1
GO:0060708	spongiotrophoblast differentiation	P	Q69ZR2	Q69ZR2	0.0319709	1
GO:0052903	N1-acetylspermine:oxygen oxidoreductase (3-acetamidopropanal-forming) activity	F	Q8C0L6	Q8C0L6	0.0319709	1
GO:0045349	interferon-alpha biosynthetic process	P	O35309	O35309	0.0319709	1
GO:0036053	glomerular endothelium fenestra	C	Q64314	Q64314	0.0319709	1
GO:0047977	hepoxilin-epoxide hydrolase activity	F	P39654	P39654	0.0319709	1
GO:0010967	regulation of polyamine biosynthetic process	P	Q8C0L6	Q8C0L6	0.0319709	1
GO:1901491	negative regulation of lymphangiogenesis	P	O08692	O08692	0.0319709	1
GO:0033971	hydroxyisourate hydrolase activity	F	Q9CRB3	Q9CRB3	0.0319709	1
GO:0044691	tooth eruption	P	P11087	P11087	0.0319709	1
GO:1900035	negative regulation of cellular response to heat	P	Q64314	Q64314	0.0319709	1
GO:0071611	granulocyte colony-stimulating factor production	P	Q64314	Q64314	0.0319709	1
GO:0035963	cellular response to interleukin-13	P	P39654	P39654	0.0319709	1
GO:1900229	negative regulation of single-species biofilm formation in or on host organism	P	P08071	P08071	0.0319709	1
GO:0098647	collagen beaded filament	C	P28654	P28654	0.0319709	1
GO:0034342	response to type III interferon	P	Q8CAK3	Q8CAK3	0.0319709	1
GO:0044213	intronic transcription regulatory region DNA binding	F	Q5TIS6	Q5TIS6	0.0319709	1
GO:0002149	hypochlorous acid biosynthetic process	P	P11247	P11247	0.0319709	1
GO:0032545	CURI complex	C	Q9D1C9	Q9D1C9	0.0319709	1
GO:0030020	extracellular matrix structural constituent conferring tensile strength	F	P02463	P02463	0.0319709	1
GO:1902233	negative regulation of positive thymic T cell selection	P	Q06180	Q06180	0.0319709	1
GO:0072209	metanephric mesangial cell differentiation	P	Q64314	Q64314	0.0319709	1
GO:0061945	regulation of protein K48-linked ubiquitination	P	O35309	O35309	0.0319709	1
GO:1902715	positive regulation of interferon-gamma secretion	P	Q3U108	Q3U108	0.0319709	1
GO:0009446	putrescine biosynthetic process	P	Q8C0L6	Q8C0L6	0.0319709	1
GO:0072535	tumor necrosis factor (ligand) superfamily member 11 production	P	P08071	P08071	0.0319709	1
GO:2001303	lipoxin A4 biosynthetic process	P	P39654	P39654	0.0319709	1
GO:0046592	polyamine oxidase activity	F	Q8C0L6	Q8C0L6	0.0319709	1
GO:0030382	sperm mitochondrion organization	P	Q80YA3	Q80YA3	0.0319709	1
GO:0035744	T-helper 1 cell cytokine production	P	Q3U108	Q3U108	0.0319709	1
GO:0004057	arginyltransferase activity	F	Q9Z2A5	Q9Z2A5	0.0319709	1
GO:0006198	cAMP catabolic process	P	E9Q4S1	E9Q4S1	0.0319709	1
GO:0060712	spongiotrophoblast layer development	P	Q69ZR2	Q69ZR2	0.0319709	1
GO:0035438	cyclic-di-GMP binding	F	Q3TBT3	Q3TBT3	0.0319709	1
GO:0052904	N1-acetylspermidine:oxygen oxidoreductase (3-acetamidopropanal-forming) activity	F	Q8C0L6	Q8C0L6	0.0319709	1
GO:0042723	thiamine-containing compound metabolic process	P	Q8CE08	Q8CE08	0.0319709	1
GO:0002266	follicular dendritic cell activation	P	Q9WTK5	Q9WTK5	0.0319709	1
GO:0035847	uterine epithelium development	P	P09803	P09803	0.0319709	1
GO:0052899	N(1),N(12)-diacetylspermine:oxygen oxidoreductase (3-acetamidopropanal-forming) activity	F	Q8C0L6	Q8C0L6	0.0319709	1
GO:0070103	regulation of interleukin-6-mediated signaling pathway	P	Q06180	Q06180	0.0319709	1
GO:0032889	regulation of vacuole fusion, non-autophagic	P	Q920Q4	Q920Q4	0.0319709	1
GO:2001301	lipoxin biosynthetic process	P	P39654	P39654	0.0319709	1
GO:0045354	regulation of interferon-alpha biosynthetic process	P	O35309	O35309	0.0319709	1
GO:0032687	negative regulation of interferon-alpha production	P	O35309	O35309	0.0319709	1
GO:0046203	spermidine catabolic process	P	Q8C0L6	Q8C0L6	0.0319709	1
GO:0035962	response to interleukin-13	P	P39654	P39654	0.0319709	1
GO:1901258	positive regulation of macrophage colony-stimulating factor production	P	Q64314	Q64314	0.0319709	1
GO:1902205	regulation of interleukin-2-mediated signaling pathway	P	Q06180	Q06180	0.0319709	1
GO:0051120	hepoxilin A3 synthase activity	F	P39654	P39654	0.0319709	1
GO:0140042	lipid droplet formation	P	P52019	P52019	0.0319709	1
GO:0070104	negative regulation of interleukin-6-mediated signaling pathway	P	Q06180	Q06180	0.0319709	1
GO:0061819	telomeric DNA-containing double minutes formation	P	Q60596	Q60596	0.0319709	1
GO:1904327	protein localization to cytosolic proteasome complex	P	Q9CVD2	Q9CVD2	0.0319709	1
GO:1900034	regulation of cellular response to heat	P	Q64314	Q64314	0.0319709	1
GO:2000308	negative regulation of tumor necrosis factor (ligand) superfamily member 11 production	P	P08071	P08071	0.0319709	1
GO:0004506	squalene monooxygenase activity	F	P52019	P52019	0.0319709	1
GO:0099038	ceramide-translocating ATPase activity	F	P06795	P06795	0.0319709	1
GO:1905078	positive regulation of interleukin-17 secretion	P	Q3U108	Q3U108	0.0319709	1
GO:0070522	ERCC4-ERCC1 complex	C	Q60596	Q60596	0.0319709	1
GO:0035846	oviduct epithelium development	P	P09803	P09803	0.0319709	1
GO:0051500	D-tyrosyl-tRNA(Tyr) deacylase activity	F	Q9DD18	Q9DD18	0.0319709	1
GO:0031848	protection from non-homologous end joining at telomere	P	Q60596	Q60596	0.0319709	1
GO:0044010	single-species biofilm formation	P	P08071	P08071	0.0319709	1
GO:2001302	lipoxin A4 metabolic process	P	P39654	P39654	0.0319709	1
GO:0005589	collagen type VI trimer	C	P28654	P28654	0.0319709	1
GO:0060174	limb bud formation	P	P28481	P28481	0.0319709	1
GO:1902232	regulation of positive thymic T cell selection	P	Q06180	Q06180	0.0319709	1
GO:0042791	5S class rRNA transcription by RNA polymerase III	P	Q8K284	Q8K284	0.0319709	1
GO:1990673	intrinsic component of endoplasmic reticulum-Golgi intermediate compartment (ERGIC) membrane	C	Q3TBT3	Q3TBT3	0.0319709	1
GO:0030899	calcium-dependent ATPase activity	F	Q02566	Q02566	0.0319709	1
GO:0032053	ciliary basal body organization	P	Q8CJ40	Q8CJ40	0.0319709	1
GO:0008193	tRNA guanylyltransferase activity	F	Q9CY52	Q9CY52	0.0319709	1
GO:0000210	NAD+ diphosphatase activity	F	Q9DCN1	Q9DCN1	0.0319709	1
GO:0050473	arachidonate 15-lipoxygenase activity	F	P39654	P39654	0.0319709	1
GO:1902524	positive regulation of protein K48-linked ubiquitination	P	O35309	O35309	0.0319709	1
GO:1904379	protein localization to cytosolic proteasome complex involved in ERAD pathway	P	Q9CVD2	Q9CVD2	0.0319709	1
GO:1904505	regulation of telomere maintenance in response to DNA damage	P	Q60596	Q60596	0.0319709	1
GO:1904875	regulation of DNA ligase activity	P	Q60596	Q60596	0.0319709	1
GO:1904877	positive regulation of DNA ligase activity	P	Q60596	Q60596	0.0319709	1
GO:0008192	RNA guanylyltransferase activity	F	Q9CY52	Q9CY52	0.0319709	1
GO:0090660	cerebrospinal fluid circulation	P	P55088	P55088	0.0319709	1
GO:1904506	negative regulation of telomere maintenance in response to DNA damage	P	Q60596	Q60596	0.0319709	1
GO:0036301	macrophage colony-stimulating factor production	P	Q64314	Q64314	0.0319709	1
GO:0033256	I-kappaB/NF-kappaB complex	C	Q9WTK5	Q9WTK5	0.0319709	1
GO:0071655	regulation of granulocyte colony-stimulating factor production	P	Q64314	Q64314	0.0319709	1
GO:1990268	response to gold nanoparticle	P	P11247	P11247	0.0319709	1
GO:0001003	RNA polymerase III type 2 promoter sequence-specific DNA binding	F	Q8K284	Q8K284	0.0319709	1
GO:0009013	succinate-semialdehyde dehydrogenase [NAD(P)+] activity	F	Q8BWF0	Q8BWF0	0.0319709	1
GO:0097552	mitochondrial double-strand break repair via homologous recombination	P	Q61216	Q61216	0.0319709	1
GO:0097551	mitochondrial double-strand break repair	P	Q61216	Q61216	0.0319709	1
GO:0007525	somatic muscle development	P	Q99PR8	Q99PR8	0.0319709	1
GO:1902618	cellular response to fluoride	P	P11087	P11087	0.0319709	1
GO:2000316	regulation of T-helper 17 type immune response	P	Q3U108	Q3U108	0.0319709	1
GO:0071306	cellular response to vitamin E	P	P11087	P11087	0.0319709	1
GO:2001300	lipoxin metabolic process	P	P39654	P39654	0.0319709	1
GO:0052901	spermine:oxygen oxidoreductase (spermidine-forming) activity	F	Q8C0L6	Q8C0L6	0.0319709	1
GO:1900228	regulation of single-species biofilm formation in or on host organism	P	P08071	P08071	0.0319709	1
GO:0045355	negative regulation of interferon-alpha biosynthetic process	P	O35309	O35309	0.0319709	1
GO:1901074	regulation of engulfment of apoptotic cell	P	P39654	P39654	0.0319709	1
GO:0019628	urate catabolic process	P	Q9CRB3	Q9CRB3	0.0319709	1
GO:0045357	regulation of interferon-beta biosynthetic process	P	O35309	O35309	0.0319709	1
GO:0044407	single-species biofilm formation in or on host organism	P	P08071	P08071	0.0319709	1
GO:0016647	oxidoreductase activity, acting on the CH-NH group of donors, oxygen as acceptor	F	Q8C0L6	Q8C0L6	0.0319709	1
GO:0034722	gamma-glutamyl-peptidase activity	F	Q9Z0L8	Q9Z0L8	0.0319709	1
GO:1905764	regulation of protection from non-homologous end joining at telomere	P	Q60596	Q60596	0.0319709	1
GO:1902732	positive regulation of chondrocyte proliferation	P	P08071	P08071	0.0319709	1
GO:0005585	collagen type II trimer	C	P28481	P28481	0.0319709	1
GO:2000307	regulation of tumor necrosis factor (ligand) superfamily member 11 production	P	P08071	P08071	0.0319709	1
GO:0048219	inter-Golgi cisterna vesicle-mediated transport	P	Q8C0L8	Q8C0L8	0.0319709	1
GO:0038001	paracrine signaling	P	Q64314	Q64314	0.0319709	1
GO:0035759	mesangial cell-matrix adhesion	P	Q64314	Q64314	0.0319709	1
GO:0047044	androstan-3-alpha,17-beta-diol dehydrogenase activity	F	O54909	O54909	0.0319709	1
GO:0071657	positive regulation of granulocyte colony-stimulating factor production	P	Q64314	Q64314	0.0319709	1
GO:0051719	DNA (cytosine-5-)-methyltransferase activity, acting on CpN substrates	F	O88508	O88508	0.0319709	1
GO:1905765	negative regulation of protection from non-homologous end joining at telomere	P	Q60596	Q60596	0.0319709	1
GO:2000556	positive regulation of T-helper 1 cell cytokine production	P	Q3U108	Q3U108	0.0319709	1
GO:0061843	Sertoli cell barrier remodeling	P	P06795	P06795	0.0319709	1
GO:0005046	KDEL sequence binding	F	Q99JH8	Q99JH8	0.0319709	1
GO:1990701	integral component of endoplasmic reticulum-Golgi intermediate compartment (ERGIC) membrane	C	Q3TBT3	Q3TBT3	0.0319709	1
GO:0051121	hepoxilin metabolic process	P	P39654	P39654	0.0319709	1
GO:0004115	3',5'-cyclic-AMP phosphodiesterase activity	F	E9Q4S1	E9Q4S1	0.0319709	1
GO:0045350	interferon-beta biosynthetic process	P	O35309	O35309	0.0319709	1
GO:0016598	protein arginylation	P	Q9Z2A5	Q9Z2A5	0.0319709	1
GO:0070524	11-beta-hydroxysteroid dehydrogenase (NADP+) activity	F	P50172	P50172	0.0319709	1
GO:1900191	negative regulation of single-species biofilm formation	P	P08071	P08071	0.0319709	1
GO:1901304	regulation of spermidine biosynthetic process	P	Q8C0L6	Q8C0L6	0.0319709	1
GO:0034456	UTP-C complex	C	Q9D1C9	Q9D1C9	0.0319709	1
GO:0046923	ER retention sequence binding	F	Q99JH8	Q99JH8	0.0319709	1
GO:0061507	cyclic-GMP-AMP binding	F	Q3TBT3	Q3TBT3	0.0319709	1
GO:0007522	visceral muscle development	P	Q02566	Q02566	0.0319709	1
GO:1902214	regulation of interleukin-4-mediated signaling pathway	P	Q06180	Q06180	0.0319709	1
GO:0006772	thiamine metabolic process	P	Q8CE08	Q8CE08	0.0319709	1
GO:1901490	regulation of lymphangiogenesis	P	O08692	O08692	0.0319709	1
GO:0042131	thiamine phosphate phosphatase activity	F	Q8CE08	Q8CE08	0.0319709	1
GO:0045358	negative regulation of interferon-beta biosynthetic process	P	O35309	O35309	0.0319709	1
GO:0051122	hepoxilin biosynthetic process	P	P39654	P39654	0.0319709	1
GO:0001161	intronic transcription regulatory region sequence-specific DNA binding	F	Q5TIS6	Q5TIS6	0.0319709	1
GO:0007256	activation of JNKK activity	P	Q80XI6	Q80XI6	0.0319709	1
GO:0042710	biofilm formation	P	P08071	P08071	0.0319709	1
GO:0051346	negative regulation of hydrolase activity	P	F8VPU2,Q810V0,P35175,Q00897,Q9D695,Q9CQV3,Q70KF4,P08071,Q9DAW9	Q62426,P51125,P21460,Q61508,P61022,Q5SYD0,Q6P9Q6,F8VPU2,Q6NZN0,Q810V0,Q5ND34,O08856,P83741,Q66JQ7,P16858,P35175,P70124,Q60854,Q9D154,P07759,P29699,P19324,P32261,Q00896,P22599,Q91WP6,Q00897,P97298,O08677,Q03734,P12388,Q5I2A0,Q9D7P9,Q9QXC1,O08800,Q8K1K6,Q9ESB3,Q61247,Q8BYY9,P49182,P25785,P97290,Q06770,P82343,Q80X76,P29788,Q7TMF5,P11859,Q8R121,Q9D695,Q9CQV3,Q9R0Q3,P26043,Q61411,Q8BK67,Q9D0J4,Q08481,…	0.0330355	0.0647482
GO:0004857	enzyme inhibitor activity	F	P56212,P35175,Q00897,Q61704,Q9D695,Q9CQV3,P35173,O08692,P08071	P34928,Q61937,Q8BML9,P61022,Q91YW3,Q99M51,Q99LH9,P70677,Q60772,Q8R409,Q3TVI4,P12367,Q9DBC7,P31324,P60840,Q99LM3,P56212,Q9DCL8,P63089,Q6R891,Q9JK37,Q8R4S0,Q8R3G1,Q62426,P35175,P01027,Q00896,P22599,Q9JMA1,P21460,Q00897,Q61838,Q9WUP7,P28666,P28665,P01029,P06684,P97430,P70124,Q60854,Q9D154,P70296,P07759,P19324,P32261,Q91WP6,P97298,Q03734,P12388,Q5I2A0,Q9D7P9,O08800,Q8K1K6,Q61704,Q9ESB3,A6X935,Q61247,…	0.0330355	0.0647482
GO:0043903	regulation of symbiosis, encompassing mutualism through parasitism	P	P51437,P11247,P28293,P08071,Q9Z108,Q8CAK3,Q61216	Q8R0K2,Q3B7Z2,P51437,P41317,Q08857,P11247,P13516,P28293,P39039,Q61805,Q3UP87,P23611,O88685,O09106,Q921F2,Q8C5L6,Q80XU3,Q9Z0H3,Q9CSN1,Q3TKT4,P62915,Q7TSG2,B2RWS6,P50446,P07356,Q9QY76,Q9WV55,Q05920,Q9CW03,P08071,P18760,P08226,P24369,P09581,Q07113,P63017,P54116,P35922,P12246,P17742,Q61656,P29341,Q62167,Q9CR16,Q3U1J4,Q8K2C9,Q9D868,P54726,O70551,Q6ZQ58,O54781,Q9Z108,Q3TIU4,O54962,Q99J93,Q9Z1X4,Q8R2Q8,…	0.0330861	0.0729167
GO:0051289	protein homotetramerization	P	P24549,Q8CE08,Q8BWF0,Q9CY52,P55088	Q9R0A0,O09012,P05064,P52480,P16858,Q9JI91,P24270,P47857,P00493,P51174,Q99L47,P46412,P09671,Q07417,Q9JLJ2,P24547,Q9JHR7,P45952,Q9CQ62,P05063,O08756,Q9CQR4,Q9WUA3,P24549,Q8K4Z3,P70460,Q60710,Q91X52,P12382,Q5SWU9,E9PZQ0,Q9QXD6,Q8K1M6,Q9CZN7,O35143,P50431,P01887,Q921M4,Q91VT4,P70429,E9Q4Z2,P47856,P47199,D3Z7P3,P61458,Q9CPS6,Q8CE08,Q8BWF0,P39039,Q8K3G9,O88898,Q9CY52,Q9WVQ5,Q91X84,P55088,Q99LG0,Q62209	0.0345225	0.0877193
GO:0008236	serine-type peptidase activity	F	P08071,P28293,P07146,Q5U405,Q3V188	P21844,Q61646,Q91VE3,P08071,P08882,P21812,P20918,Q9QUR6,P19221,P03953,O88696,Q61129,P04186,P21845,Q8R146,Q8CGK3,P97821,P26262,Q5S248,P28843,Q61955,P49935,Q02844,Q64514,P28293,O89023,P07146,Q5XJY4,Q8BHC7,Q8CG16,Q9JIY5,Q8CG14,Q61096,Q8K4I7,P33434,P33587,Q80YC5,Q3UP87,O88947,Q9Z0F8,Q8C167,Q8K0D2,P97321,Q5U405,P41245,Q7M761,Q920A5,P16675,O89001,P09470,Q9R0P6,Q3V188,Q7TMR0,Q9ET22,Q9D8V7,Q8BVG4,Q6PFD9	0.0345225	0.0877193
GO:1902106	negative regulation of leukocyte differentiation	P	Q06180,Q9CXD9,P08071	Q01768,P15532,P25911,Q60994,Q3TCH7,Q9ES52,P70424,Q08024,P12804,O54879,Q61171,P04441,P15379,P10107,Q8BKT7,Q06180,P12246,Q02248,Q61554,Q9CXD9,P26450,P08071,Q9Z0U1	0.0355273	0.130435
GO:0030203	glycosaminoglycan metabolic process	P	Q8BHC0,P28654,Q61704	O70475,P29416,P05622,Q91Z92,Q8R087,Q9ES89,Q8BHC0,P28654,P28653,Q8R3H7,Q80V26,Q811B1,Q61704,A6X935,Q61702,Q61703,Q8BJD1,P15379,Q68FD5,P17426,P25799,P20060,Q8BFR4	0.0355273	0.130435
GO:0046718	viral entry into host cell	P	Q61216,P10605,Q920Q4	P49817,P42567,Q61510,P13020,O70492,Q99J93,P12246,P70388,Q80VI1,Q61216,Q8R0K2,P16045,P09103,P04441,P10605,O70404,Q8R007,P43406,Q8R307,O35604,Q920Q4,Q9JKF6,O54890	0.0355273	0.130435
GO:0006694	steroid biosynthetic process	P	Q9ERY9,P50172,P52019,E9Q4S1,Q9D0S9	P08226,Q00623,P06728,Q00612,P58044,Q9DCN2,Q8JZK9,Q8K0C4,Q920E5,Q8VCT4,Q8VCH6,Q8BLN5,Q9R1J0,Q3U9G9,Q99JF5,O88736,O88455,P53798,Q9R008,P54869,Q5EG47,Q91WG1,Q9ERY9,O09174,Q60991,Q9DBG1,Q9QZ82,P32020,Q61009,O70503,P50171,P50172,P27786,Q8K023,Q9WV54,Q64213,Q61581,P25799,Q9DB73,P52019,Q9CRA4,Q8VDN2,Q9QUN9,P08228,Q8BFZ9,Q91X78,P37040,Q99J08,E9Q4S1,P0C605,Q9CY27,Q8BMP6,P46656,Q9EQ06,Q9D0S9,Q9D665,P00184,…	0.0368398	0.0862069
GO:0001890	placenta development	P	Q69ZR2,P10605,P09803,P28654	Q9R0Q3,P28033,Q01279,P53566,Q69ZR2,P20108,Q9JII5,P10605,P63085,Q63844,P06797,P09803,P18572,P23242,P63089,P09450,P47713,Q62318,Q60631,P31938,Q0VBL3,A2BH40,O35516,Q9JI11,P20918,P43406,O54946,Q9R1J0,Q8BI41,P11499,P28654,P62754,Q99LF4,P03958,P47811,P28231,Q61391,P16056,Q8CIZ8,O08648	0.0376392	0.1
GO:0016459	myosin complex	C	Q5XKE0,Q02566,P70402,A2AQP0	Q8VDD5,Q9CQ19,Q3THE2,Q6URW6,Q61879,Q60605,Q8CI43,Q99104,Q5SX40,Q5SX39,P13542,O08638,Q5XKE0,Q62234,P13541,Q91Z83,Q02566,P70402,A2AQP0,A2ASS6,Q9D0M5,A2AAJ9,P97457,P05977,Q9WTI7,P09542,P51667,Q9JMH9,Q5SYD0,E9Q634,P46735,Q64331,P09541,P70248,Q5SUA5,Q6AW69,Q9QY06,F8VQB6,P59242,Q99MZ6	0.0376392	0.1
GO:0061437	renal system vasculature development	P	Q64314,Q9D695	P97333,Q64314,Q08481,O35516,Q9D695,O54890,Q8BUD0,P05622,Q02013,P26618	0.0386186	0.2
GO:0048739	cardiac muscle fiber development	P	Q5XKE0,Q02566	O08638,Q5XKE0,A2ASS6,Q62234,A2ABU4,O70548,Q02566,Q80W54,P82347,P97792	0.0386186	0.2
GO:0046697	decidualization	P	P10605,P09803	P10605,P63085,Q63844,P06797,P09803,P18572,P23242,P63089,P09450,P47713	0.0386186	0.2
GO:0032780	negative regulation of ATPase activity	P	P08071,Q9DAW9	Q99M08,Q04646,A2ASQ1,Q9QXS6,P08071,Q99KR7,Q9CQV1,O35143,Q9DAW9,Q8BGA9	0.0386186	0.2
GO:0016233	telomere capping	P	Q61216,Q60596	P70388,Q61216,P63085,Q63844,Q60668,Q9JLV6,O08648,Q60596,O88569,P97313	0.0386186	0.2
GO:0061440	kidney vasculature development	P	Q64314,Q9D695	P97333,Q64314,Q08481,O35516,Q9D695,O54890,Q8BUD0,P05622,Q02013,P26618	0.0386186	0.2
GO:0017171	serine hydrolase activity	F	P08071,P28293,P07146,Q5U405,Q3V188	P21844,Q61646,Q91VE3,P08071,P08882,P21812,P20918,Q9QUR6,P19221,P03953,O88696,Q61129,P04186,P21845,Q8R146,Q8CGK3,P97821,P26262,Q5S248,P28843,Q61955,P49935,Q02844,Q64514,P28293,O89023,P07146,Q5XJY4,Q8BHC7,Q8CG16,Q9JIY5,Q8CG14,Q61096,Q8K4I7,P33434,P33587,Q80YC5,Q3UP87,O88947,Q9Z0F8,Q8C167,Q8K0D2,P97321,Q5U405,P41245,Q7M761,Q920A5,P16675,O89001,Q9R0P6,Q3V188,Q7TMR0,Q9ET22,Q9D8V7,Q8BVG4,Q6PFD9,P09470,…	0.0417561	0.0833333
GO:0001818	negative regulation of cytokine production	P	O35309,P55088,P49290,Q61878,Q64314,P08071	Q9D659,P70387,Q8R2Q8,Q00623,P09813,P60670,P70362,O35309,Q80U70,Q18PI6,Q9EPB4,P36993,P97797,P15307,Q00899,Q3TL44,O35658,P04925,O08573,Q9EP73,P19157,Q05117,P55088,O88895,P49290,Q61878,P08101,P35441,Q9QYY1,Q8K1X4,P63001,P29351,P17439,Q9BCZ4,P41241,Q60994,Q64314,Q99P91,Q9DBR0,O08691,Q61805,P14901,Q9JLQ0,O54885,P10287,Q3UP87,P25799,P06800,Q9ES52,Q60953,P27931,Q9D154,P16056,P51910,Q9ES30,Q80TH2,Q8VCM5,…	0.0418236	0.075
GO:0048871	multicellular organismal homeostasis	P	Q64314,P28481,Q8CJ40,P09803,Q9Z2K1,Q2VIS4,Q5U405,P55088,P24549	P11352,P50544,P51174,P42227,Q8BGW1,P25085,P45376,Q02248,P09055,Q5SWU9,P63094,Q64314,P28481,P05622,P46938,Q64739,P08228,P10287,Q9DBI2,P56695,Q01341,Q02013,P97792,Q8CJ40,Q5PR69,Q9Z1Z2,Q00724,P11589,Q60714,P61922,P09803,P13516,P17439,Q9D8B3,Q9Z1W9,Q8BH97,P49935,P47713,P43406,P09581,P51150,P63001,Q05144,O70370,P35276,Q05117,O89023,P55097,P05480,P22682,Q8BP00,O35600,Q8VHN7,P41241,Q9ES52,P56528,Q9Z1M0,…	0.0431827	0.0616438
GO:0035295	tube development	P	Q9Z2G9,P02463,Q03173,Q69ZR2,Q5TIS6,Q8C138,P28654,O08692,O35465,Q9D6H2,P50172,P09803,P51437,Q64314,P08121,P28481	P56480,Q8VDD5,P07356,Q8BTM8,Q9QYB1,P09405,P31230,P49817,P15105,P82198,P21956,Q80UM3,P97449,P27601,P01831,Q61508,P11276,Q9ESB3,P32921,Q05793,P14901,Q9D868,P47811,O89110,P62746,Q08481,Q9CPT4,Q8BH43,Q9ESD7,Q8R2Y2,Q8BVF2,Q8VE70,P12815,P43406,O54781,P39061,O88597,P34152,Q8VHY0,P53690,Q3TAS6,Q9Z2G9,P33434,P20444,P16406,P97333,Q9D8B7,Q8K4G2,Q3U0S6,Q64429,Q63961,P97321,P08122,Q6ZPF4,Q3UH93,Q62178,E9Q555,…	0.04387	0.0506329
GO:0050954	sensory perception of mechanical stimulus	P	P11087,P09803,P28481,P55088	P08228,Q60854,Q9JJI8,O88342,P11352,P11087,P70441,Q61207,Q6URW6,P09803,P20060,P04370,P13597,O08808,P70677,Q64331,P29416,Q99K30,P28481,P39447,Q920R6,P56695,Q810U5,Q3UUQ7,P56564,A1Y9I9,P34056,Q61245,P55088,Q8BHJ7,Q99KW3,Q8K4E0,Q8VIM6,Q64739,A2AJK6,Q8VHN7,P55012,Q925B0,Q80TL4,Q8CD54,P63011,Q9JJX6	0.0439108	0.0952381
GO:0001523	retinoid metabolic process	P	P24549,O54909,Q08652	Q00915,P22935,P24549,Q8VCH7,P62965,P07309,Q64437,Q9QYF1,P00329,Q9ERI6,Q7TQA3,Q8BYK4,O88451,Q00724,O54909,P00184,Q64429,Q920A5,Q8K023,Q99LB2,Q9Z2A7,P45376,P28474,P45377,Q08652	0.04406	0.12
GO:0030260	entry into host cell	P	P10605,Q920Q4,Q61216	P10605,O70404,P42567,Q8R007,P43406,Q8R307,O35604,Q920Q4,Q9JKF6,O54890,P49817,Q61510,P13020,O70492,Q99J93,P12246,P70388,Q80VI1,Q61216,Q8R0K2,P16045,P09103,P04441,Q9D4H1,O35250	0.04406	0.12
GO:0044409	entry into host	P	P10605,Q920Q4,Q61216	P10605,O70404,P42567,Q8R007,P43406,Q8R307,O35604,Q920Q4,Q9JKF6,O54890,P49817,Q61510,P13020,O70492,Q99J93,P12246,P70388,Q80VI1,Q61216,Q8R0K2,P16045,P09103,P04441,Q9D4H1,O35250	0.04406	0.12
GO:0051806	entry into cell of other organism involved in symbiotic interaction	P	P10605,Q920Q4,Q61216	P10605,O70404,P42567,Q8R007,P43406,Q8R307,O35604,Q920Q4,Q9JKF6,O54890,P49817,Q61510,P13020,O70492,Q99J93,P12246,P70388,Q80VI1,Q61216,Q8R0K2,P16045,P09103,P04441,Q9D4H1,O35250	0.04406	0.12
GO:0051828	entry into other organism involved in symbiotic interaction	P	P10605,Q920Q4,Q61216	P10605,O70404,P42567,Q8R007,P43406,Q8R307,O35604,Q920Q4,Q9JKF6,O54890,P49817,Q61510,P13020,O70492,Q99J93,P12246,P70388,Q80VI1,Q61216,Q8R0K2,P16045,P09103,P04441,Q9D4H1,O35250	0.04406	0.12
GO:0001530	lipopolysaccharide binding	F	P08071,P51437	P63038,Q9R1P4,P08071,P51437,P99026,P19221,Q9R020,Q61805,Q9Z1M0,P10810,Q61009	0.0462274	0.181818
GO:2001239	regulation of extrinsic apoptotic signaling pathway in absence of ligand	P	P28481,Q9R0M3	Q61171,P26231,P28481,Q60855,Q76MZ3,Q07813,P62137,Q7TNP2,O54784,Q9R0M3,Q9JIY5	0.0462274	0.181818
GO:0004029	aldehyde dehydrogenase (NAD) activity	F	P47739,P24549	Q9DBF1,P28474,P47739,P24549,Q80VQ0,Q9JLJ2,P47740,P47738,E9Q3E1,Q8CHT0,Q8R0Y6	0.0462274	0.181818
GO:0060333	interferon-gamma-mediated signaling pathway	P	Q06180,O35309	P11499,Q61081,Q91X72,Q60766,Q8CAS9,Q06180,Q99M87,Q61176,P42225,O35309,Q62120	0.0462274	0.181818
GO:0051900	regulation of mitochondrial depolarization	P	P28654,P97494	P68040,P28654,Q9EQQ9,P11103,O70624,Q9Z1M0,P05201,P05480,O09172,P97494,P48410	0.0462274	0.181818
GO:0016114	terpenoid biosynthetic process	P	P24549,O54909	Q00915,P22935,P24549,Q8VCH7,Q8JZK9,P54869,Q8BLN5,Q920E5,O54909,P00184,Q8K023	0.0462274	0.181818
GO:0005523	tropomyosin binding	F	P14069,Q3UHZ5	Q9EPB4,Q9QZ47,P14069,Q9JHJ0,P49813,Q9JLH8,Q99LM3,O88346,Q8BVA4,Q9JKK7,Q3UHZ5	0.0462274	0.181818
GO:0042573	retinoic acid metabolic process	P	P24549,O54909	Q00915,P22935,P24549,Q8VCH7,P62965,O54909,P00184,Q8K023,Q64437,P00329,Q920A5	0.0462274	0.181818
GO:0002683	negative regulation of immune system process	P	Q8C138,P39654,Q9WTX8,Q06180,Q9CXD9,O35309,P08121,P08071	P08101,P97290,P48453,P06800,P35441,Q8VD31,P31996,P12804,P70387,P97313,P03958,Q8C138,Q5SSL4,Q99N11,Q9D659,Q8R2Q8,Q00623,P09813,Q01768,P15532,P25911,P39654,O08691,P52633,Q9R1P4,P11352,P99026,Q9BCZ4,P34884,P04441,P15379,P29351,O35215,P06684,Q9JM90,Q60994,Q3TCH7,Q9ES52,P70677,O54885,Q925B0,P35991,P14901,O08573,Q18PI6,P20491,P70424,P58242,B2RRE7,Q8R317,O35658,P60670,P70362,Q3TL44,P14483,P14438,O35988,…	0.0476447	0.0634921
GO:0045638	negative regulation of myeloid cell differentiation	P	Q06180,Q9CXD9,P08071	Q01768,P15532,P25911,Q60994,Q3TCH7,Q9ES52,P38647,P42232,Q8BKT7,Q06180,P62806,Q9JIF0,P12246,Q02248,Q61554,Q9CXD9,P26450,P08071,Q9Z0U1,O54879,Q9ERF3,Q8K2T8,Q5XJE5,Q8JZM7,Q0VBL3,Q62018	0.0486746	0.115385
GO:0046332	SMAD binding	F	Q01149,P08121,Q3U962	P70398,Q02248,Q62219,P97471,Q61656,P49443,Q9CT10,P11103,Q4LDD4,Q9R0G7,Q8BTM8,Q01149,Q9WUD1,P26883,P42669,O35295,P08121,Q9CSN1,Q9EPL8,Q8R5H1,Q3U962,O88939,Q60953,Q00899,O88393,B2RWS6	0.0486746	0.115385

## Sheet: UC vs NC
GO_ID	Term	Category	TestSeqs	RefSeqs	P value	richFactor
GO:0033561	regulation of water loss via skin	P	Q2VIS4,O88551,O35054,Q9D709,P09803	Q9Z2K1,O70456,P04104,P54227,Q8VHD8,P11088,Q2VIS4,Q5MPP0,O88551,Q9JLJ5,O35054,O88898,Q99KY4,Q9D709,Q5U405,P16056,P09803,P13516,P17439	1.99978e-05	0.263158
GO:0050891	multicellular water homeostasis	P	P09803,Q2VIS4,O88551,O35054,Q9D709	P45376,P56695,Q01341,Q02013,P09803,P13516,P17439,Q9Z2K1,O70456,P04104,P54227,Q8VHD8,P11088,Q2VIS4,Q5MPP0,O88551,Q9JLJ5,O35054,O88898,Q99KY4,Q9D709,Q5U405,P16056,P55088,Q8C5L6	8.35596e-05	0.2
GO:0030104	water homeostasis	P	P09803,Q2VIS4,O88551,O35054,Q9D709	P45376,P56695,Q01341,Q02013,Q07076,P55088,P09803,P13516,P17439,Q9Z2K1,O70456,P04104,P54227,Q8VHD8,P11088,Q2VIS4,Q5MPP0,O88551,Q9JLJ5,O35054,O88898,Q99KY4,Q9D709,Q5U405,P16056,Q8C5L6	0.000101926	0.192308
GO:0061436	establishment of skin barrier	P	Q2VIS4,O88551,O35054,Q9D709	Q9Z2K1,O70456,P04104,P54227,Q8VHD8,P11088,Q2VIS4,Q5MPP0,O88551,Q9JLJ5,O35054,O88898,Q99KY4,Q9D709,Q5U405,P16056	0.000179904	0.25
GO:0001533	cornified envelope	C	Q62267,P56567,Q2VIS4,P97347	Q62266,Q62267,P10107,P56567,P04104,E9Q557,Q8VHD8,P11088,Q2VIS4,P48997,Q08189,Q9D952,Q8CGN8,P97347,Q3TTY5,O70556,P18165,Q8BG67	0.000293864	0.222222
GO:0006721	terpenoid metabolic process	P	Q08652,O54909,P62965,Q7TQA3,P53798	P45376,P28474,P45377,Q64437,Q9QYF1,P24549,P00329,Q08652,O54909,Q00915,P22935,Q8VCH7,P47740,Q8JZK9,P54869,Q05421,Q01279,Q8BLN5,Q8K023,Q9JIY5,Q99MZ7,Q920E5,P62965,P07309,Q9ERI6,Q7TQA3,Q8BYK4,O88451,Q00724,P00184,Q64429,Q920A5,Q99LB2,P53798,Q9Z2A7	0.000440048	0.142857
GO:2000757	peptidyl-lysine acetylation	P	Q7TQA3,O55042,Q9D0S9	Q7TQA3,O88712,O55042,Q60520,Q9D906,Q99J83,O09106,P70288,Q9D0S9	0.000499296	0.333333
GO:0008198	ferrous iron binding	F	O55042,Q9D7P6,Q8BGW1	P09528,P29391,Q921I1,Q61503,O55042,Q05117,Q9D7P6,Q8BGW1,P70697,Q4JK59	0.000703577	0.3
GO:0004869	cysteine-type endopeptidase inhibitor	F	O55042,P35173,P56567,P35175	P51125,P99029,Q9D1X0,P31428,Q921Z5,P20108,O55042,O70201,Q64373,P18654,Q62426,P35173,P56567,P35175,O08692,P29699,P08071,P21460,O08677,Q5I2A0,Q9QXC1,Q9ESB3,Q3UE37	0.000791243	0.173913
GO:0006720	isoprenoid metabolic process	P	Q08652,O54909,P53798,P62965,Q7TQA3	P45376,P28474,P45377,Q64437,Q9QYF1,P24549,P00329,Q08652,O54909,Q00915,P22935,Q8VCH7,P47740,P58044,Q920E5,Q99JF5,P53798,Q9R008,O09174,Q8JZK9,P54869,Q05421,Q01279,Q8BLN5,Q8K023,O70152,P42867,Q9JIY5,Q99MZ7,P62965,P07309,Q9ERI6,Q7TQA3,Q8BYK4,O88451,Q00724,P00184,Q64429,Q920A5,Q99LB2,Q9Z2A7	0.000929369	0.121951
GO:1901984	negative regulation of protein acetylation	P	Q7TQA3,O55042,Q9D0S9	Q7TQA3,O88712,O55042,Q60520,Q9D906,Q99J83,O09106,P70288,Q9D0S9,Q99LX0,Q9WV60	0.000954269	0.272727
GO:0016338	cell-adhesion molecules	P	O88551,O35054	O88551,O35054,Q925F2	0.00103826	0.666667
GO:0010166	wax metabolic process	P	Q7TNT2,Q6E1M8	Q7TNT2,Q922J9,Q6E1M8	0.00103826	0.666667
GO:0005549	odorant binding	F	P11589,Q9D3H2	P11589,B5X0G2,Q9D3H2	0.00103826	0.666667
GO:0010025	wax biosynthetic process	P	Q7TNT2,Q6E1M8	Q7TNT2,Q922J9,Q6E1M8	0.00103826	0.666667
GO:0001523	retinoid metabolic process	P	P62965,Q7TQA3,O54909,Q08652	Q00915,P22935,P24549,Q8VCH7,P62965,P07309,Q64437,Q9QYF1,P00329,Q9ERI6,Q7TQA3,Q8BYK4,O88451,Q00724,O54909,P00184,Q64429,Q920A5,Q8K023,Q99LB2,Q9Z2A7,P45376,P28474,P45377,Q08652	0.00109828	0.16
GO:0032794	GTPase activating protein binding	F	P09803,Q9QUR7,P11798	P99024,Q9DC51,B2RSH2,P09803,Q9QUR7,P11798,P18872,Q9WUL7,Q9JL26,Q6PAR5,Q6ZPF4,Q91YM2	0.00125508	0.25
GO:0016101	diterpenoid metabolic process	P	Q08652,O54909,P62965,Q7TQA3	P45376,P28474,P45377,Q64437,Q9QYF1,P24549,P00329,Q08652,O54909,Q00915,P22935,Q8VCH7,P47740,Q99MZ7,P62965,P07309,Q9ERI6,Q7TQA3,Q8BYK4,O88451,Q00724,P00184,Q64429,Q920A5,Q8K023,Q99LB2,Q9Z2A7,Q01279	0.00170262	0.142857
GO:0072111	cell proliferation involved in kidney development	P	Q9D695,P42225	Q9D695,O54890,P42225,P05622	0.00205106	0.5
GO:0035458	cellular response to interferon-beta	P	Q9Z0E6,P42225,Q62293	P61087,O08529,Q9ERS2,Q9Z0E6,Q9QZ85,Q9R002,P42225,Q60766,Q61107,P0DOV2,Q8CGE8,P60605,Q62293,Q9JIY5,Q3TBT3	0.00249156	0.2
GO:1901570	fatty acid derivative biosynthetic process	P	P36423,Q7TNT2,Q6E1M8,Q8BHI7	Q9R0Q7,P34884,Q9JM51,P04441,Q9DB60,P22437,Q9JHF7,Q8BWM0,P36423,Q50L41,Q7TNT2,Q922J9,Q6E1M8,P24527,P30355,P48999,Q05816,P10107,Q9WTU6,P47713,P41216,Q8JZR0,Q9JLJ5,Q9EQC4,Q9D2Y9,Q8BHI7,Q9QUJ7,Q60759,P38060,Q9Z2A9,Q8QZT1,P39654	0.00282351	0.125
GO:0031434	MAPK kinase binding	F	Q9QUR7,Q80XI6	Q61249,Q9QUR7,P09470,Q811D0,Q80XI6	0.00337658	0.4
GO:0035235	ionotropic glutamate receptor signaling pathway	P	P11798,Q6PIC6	P11798,A2CG49,Q6PIC6,P12023,P23819	0.00337658	0.4
GO:0035456	response to interferon-beta	P	Q9Z0E6,P42225,Q62293	P61087,O08529,Q9ERS2,Q9Z0E6,Q9QZ85,Q9R002,P42225,Q60766,Q61107,P0DOV2,Q8CGE8,P60605,Q62293,Q9JIY5,Q3TBT3,Q99J93,Q8R2Q8,O35664	0.00428948	0.166667
GO:0034341	response to interferon-gamma	P	P42225,Q9Z0E6,O88551,O55042,Q62293	Q8CAS9,Q91X72,P42225,O35309,Q62120,P11499,Q61081,Q60766,Q06180,Q99M87,Q61176,P20152,P63260,P16858,P63024,P19253,P60766,Q99JY9,Q61768,Q80X90,O70404,Q61830,P13020,Q9WTI7,P14483,Q8CGC7,O70200,Q7TMK9,P61161,P24452,P70452,Q9Z0E6,P16460,P14429,O88983,Q9JMH9,Q60770,Q64324,Q8C0E2,P70429,Q62523,O88551,P29452,Q61735,Q61107,O54784,P97797,Q8R361,O08599,P23611,P55088,Q3TIU4,Q99J93,O55042,Q8R2Q8,P61620,Q62293,…	0.00442077	0.0862069
GO:1901568	fatty acid derivative metabolic process	P	P36423,Q7TNT2,Q6E1M8,P12791,Q8BHI7	Q9R0Q7,P34884,Q9JM51,P04441,Q9DB60,P22437,Q9JHF7,Q8BWM0,P36423,Q50L41,Q9EP75,P24527,Q09014,P48999,Q8K023,P27612,Q9R0H0,Q8VDQ1,Q62011,P13745,Q7TNT2,Q922J9,Q6E1M8,O35678,Q63844,P55249,P39654,Q91WC9,Q64429,P47713,Q99N16,P30355,P33267,P12791,P12790,Q05421,Q05816,P10107,Q9WTU6,Q9Z2A7,Q9CQJ0,P41216,Q8JZR0,Q9JLJ5,Q9EQC4,Q9D2Y9,Q8BHI7,Q9QUJ7,P51660,P48410,Q91V12,Q60759,P38060,Q9D0K2,Q8QZT1,Q9ESL0,Q9Z2A9,…	0.00442077	0.0862069
GO:0005506	iron ion binding	F	O55042,Q9D7P6,Q8BGW1,P12791,P36423	P09528,P29391,Q921I1,Q61503,O55042,Q05117,Q9D7P6,Q8BGW1,P70697,Q4JK59,P14211,P01942,Q91WS0,Q99KI0,P08071,Q3TYQ9,Q5MPP0,Q8K0C4,Q00519,Q9CX80,Q924Y0,P61222,P55249,P11672,Q9DCM0,Q99JT9,Q60715,P33267,P13516,P46656,Q8BKE6,P22315,P12791,Q60716,Q91ZE0,Q6T707,P39654,Q3V1T4,Q9R0E1,Q64462,P12790,Q05421,P36423,Q8BLR9,Q9CRA4,Q99LN9,Q9QZ23,P48999,G3X982,Q60991,Q8CG70,P00184,Q64429,Q8CHR6,Q99N16,P27786,Q9EP75,…	0.0047595	0.0847458
GO:0097512	cardiac myofibril	C	P14602,A2AQP0	P31001,P14602,P23927,P51667,A2AQP0,Q3UHZ5	0.00500293	0.333333
GO:0035067	negative regulation of histone acetylation	P	Q7TQA3,O55042	O88712,Q60520,Q9D906,Q99J83,Q7TQA3,O55042	0.00500293	0.333333
GO:0016918	retinal binding	F	P62965,Q08652	Q00915,P22935,P62965,Q9EPC5,Q00724,Q08652	0.00500293	0.333333
GO:0005198	structural molecule activity	F	Q62267,Q61555,Q8BLX7,Q5EBG6,Q6ZQH8,O70548,P60202,Q2VIS4,P46660,Q61414,O88551,O35054,Q61765	Q9QZJ6,Q99K41,P62908,P99027,P62830,Q9CQR2,P35979,P63325,P62301,P62702,P25444,P51410,Q9CZX8,Q9Z1P6,P97351,P63323,P62984,P62983,P14131,P62267,P62270,P62889,P14869,Q8BP67,Q6ZWN5,P62281,O09167,P19253,O55142,Q9D823,P62751,P62082,P62245,P62852,P41105,P61358,Q6ZWV3,P62754,Q9JJI8,P14206,P62858,P62242,Q9D8E6,P14148,P62855,P62918,P97461,P47963,P63276,P27659,P47911,Q9D1R9,P62900,P53026,Q9CPR4,P62849,P62264,…	0.00578231	0.0411392
GO:0048168	regulation of neuronal synaptic plasticity	P	O55042,O88935,P11798	Q9CQD1,P55258,Q61411,O55100,P28652,O55042,P08101,P32883,P11859,P50114,P12023,Q8CC35,P97300,P63011,O88935,Q80UJ7,P60469,P63001,Q8VCR8,P11798,Q9WV60	0.0067122	0.142857
GO:0019841	retinol binding	F	P62965,Q08652	Q00915,P22935,P62965,Q64437,Q9EPC5,Q00724,Q08652	0.00691857	0.285714
GO:0097384	cellular lipid biosynthetic process	P	P53798,Q8C0I1	P53798,Q9ERY9,P19096,Q922J9,Q99J47,Q8C0I1,P98192	0.00691857	0.285714
GO:0042803	protein homodimerization activity	F	P14602,Q9D7X8,Q5EBG6,P09803,Q91VS7,Q9Z0E6,P11798,Q9CYL5,P42225,O54909,Q9D7I5,Q99JZ0,Q99J45,Q80XI6	P32848,P16045,P58771,P58774,P15626,O88844,P16858,P10107,Q9JI91,P14602,Q99LX0,P10649,P21550,P08249,P57780,O08709,Q6IRU2,Q8VDD5,Q7TPR4,P11499,O88990,P17751,P35700,Q9CZX8,P14824,P23927,O54962,P40142,P17182,Q8R429,P08226,P68040,Q8BTM8,P13707,P97352,Q9EPB4,P06728,P30275,Q9CYZ2,Q61937,P14148,P28650,P07901,Q64105,O35678,P50543,Q9D8B3,Q62234,Q8BL66,Q9WU78,P24270,Q9D0K2,Q8QZT1,P57759,Q9CQB5,P47857,P14069,…	0.00887035	0.0377358
GO:1901216	positive regulation of neuron death	P	Q9QUR7,Q80XI6,O55042,Q9CR84	P60766,Q9QUI0,Q02248,Q9CQ92,Q07813,P61082,Q9Z0X1,Q9JI75,Q60739,Q9WUU7,Q64669,Q9QUR7,P04925,Q9WV60,P70677,P28798,O08738,O70145,O54781,Q925B0,P49615,P47809,Q3V3R4,P34056,A2ASQ1,O88895,A2A8L5,Q61772,Q80XI6,O54885,P05555,Q6ZWX6,O08529,Q06890,Q8R010,O89110,P98086,O55042,P08101,Q7M6Y3,Q9CR84,P11103,O88351,Q9Z0J4,Q9JLN9	0.0097162	0.0888889
GO:2000756	regulation of peptidyl-lysine acetylation	P	Q7TQA3,O55042,Q9D0S9	Q61164,Q9WTM5,Q63844,Q3U108,Q9Z0J4,Q9JHD2,B2RWS6,Q7TQA3,O88712,O55042,P97765,Q80W54,Q8C1D8,Q9Z0H3,Q60520,O35280,Q9JIA7,P97471,Q9D906,Q99J83,O09106,P70288,Q9D0S9,Q5EG47	0.0098077	0.125
GO:0009617	response to bacterium	P	P18524,P06327,Q9Z0E6,P42225,Q91VS7,O55042,O88551,Q9WTK5,P12791,Q62293	P01887,P36371,P10810,Q91VE3,Q3UP87,Q9D2Q8,P62821,O35639,Q91V41,P01837,P01901,P01863,P06330,Q61646,P51437,P01867,P18528,P18527,P08905,P18524,P04223,P01872,P11247,P01806,P20491,P18525,P01796,Q91ZW8,P11672,P49290,Q09014,P01820,Q61878,P01786,Q9JI48,P01868,P28033,P60603,P01795,P06327,Q8VCF0,P28867,P01821,P18531,P01759,Q8R4Y4,B9EKI3,P23611,Q99NH0,O35516,A1L314,P50446,P30681,P41317,Q08857,Q9Z0E6,P62892,…	0.010625	0.0434783
GO:0016328	lateral plasma membrane	C	P09803,O88551,O35054	P10107,Q02257,P16546,Q9JKF1,Q76MZ3,Q02248,Q9WTI7,E9Q7G0,Q9WUM4,Q7TSF1,Q8BGV3,P09803,Q61495,Q9D0J4,Q99JW5,O88551,Q8BYA0,O35054,P27600,Q811D0,P23242,G5E8K5,O55111,Q05512,P51141	0.0109954	0.12
GO:0071229	cellular response to acid chemical	P	P09803,Q8BLX7,Q6PIC6,O88551,Q9CR84	Q9JJK2,Q04857,P11087,Q01149,O08529,Q9D1L9,P09803,Q60668,P16460,P08121,Q99K70,Q8BKC5,Q8BMJ2,O88653,P28862,P28033,Q64373,Q3U962,Q80X95,Q01279,O88508,P13864,P33434,Q8BLX7,P26618,P02463,Q9JLN9,Q64430,Q6WKZ8,O35129,Q6PIC6,Q9Z0P5,Q9ERS2,P97298,P08730,Q02013,Q8BKG3,Q80YX1,Q9CSN1,Q9QYC0,Q04736,Q9Z2V4,P25911,P28231,Q9JIY5,P46938,P41233,A2AKX3,Q8K023,Q5SWU9,P63094,Q5EG47,Q9DBR0,Q01341,Q01768,P15532,P97742,…	0.0116263	0.0684932
GO:0006629	lipid metabolic process	P	P36423,Q08652,O54909,O55042,Q8BHI7,Q9D0S9,P53798,P12791,Q8C0I1,Q9D6J1,P62965,Q7TQA3,Q8C138,P60202,P11589,Q7TNT2	Q921H8,P51660,Q91VE0,Q9QYR9,Q9R0H0,Q99PU5,Q61285,P48410,O09012,Q99N16,Q9R0Q7,P34884,Q9JM51,P04441,Q9DB60,P22437,Q9JHF7,Q8BWM0,P36423,Q50L41,P45376,P28474,P45377,Q64437,Q9QYF1,P24549,P00329,Q08652,O54909,Q9QXE0,P41216,O55137,Q8JZR0,Q8JZN5,Q08857,Q60714,P97742,O88561,Q00915,P22935,Q8VCH7,Q05421,P00184,Q9DBE8,P42867,Q3UUQ7,O70152,Q9D1Q4,Q99LV7,Q9WTK3,Q91YL7,O70362,P11404,P04117,P56395,P52503,P01027,…	0.0121413	0.0344086
GO:0004866	endopeptidase inhibitor activity	F	Q9D695,P35173,P56567,P35175,O55042	P70124,Q60854,Q9D154,P70296,P07759,P19324,P32261,Q00896,P22599,Q91WP6,Q00897,Q61838,P97298,Q03734,P28666,P12388,P28665,Q5I2A0,Q9D7P9,O08800,Q8K1K6,Q61704,Q9ESB3,A6X935,Q61247,Q61702,Q07456,Q61703,Q8BYY9,P49182,Q63870,P97290,Q06770,Q80X76,Q7TMF5,P11859,Q8R422,P97430,Q8R121,Q9D695,Q9EPX2,P12023,Q8BJD1,Q9CQV3,Q2UY11,Q62426,P35173,P56567,P35175,O08692,P29699,P08071,P21460,O08677,Q9QXC1,Q3UE37,P25785,…	0.012974	0.0666667
GO:1901983	regulation of protein acetylation	P	Q7TQA3,O55042,Q9D0S9	Q61164,Q9WTM5,Q63844,Q3U108,Q9Z0J4,Q9JHD2,B2RWS6,Q7TQA3,O88712,O55042,P97765,Q80W54,Q8C1D8,Q9Z0H3,Q60520,Q99LX0,Q9WV60,Q5F2E8,O35280,Q9JIA7,P97471,Q9D906,Q99J83,O09106,P70288,Q9D0S9,Q5EG47	0.0136104	0.111111
GO:0005501	retinoid binding	F	P62965,Q08652	Q05816,P22935,P62965,Q63886,Q07113,Q00915,Q9EPC5,Q00724,Q08652,Q64437	0.0142905	0.2
GO:0030414	peptidase inhibitor activity	F	P35175,Q9D695,P35173,P56567,O55042	Q62426,P35175,P01027,Q00896,P22599,Q9JMA1,P21460,Q00897,Q61838,Q9WUP7,P28666,P28665,P01029,P06684,P97430,P70124,Q60854,Q9D154,P70296,P07759,P19324,P32261,Q91WP6,P97298,Q03734,P12388,Q5I2A0,Q9D7P9,O08800,Q8K1K6,Q61704,Q9ESB3,A6X935,Q61247,Q61702,Q07456,Q61703,Q8BYY9,P49182,Q63870,P97290,Q06770,Q80X76,Q7TMF5,P11859,Q8R422,Q8R121,Q9D695,Q9EPX2,P12023,Q8BJD1,Q9CQV3,Q2UY11,P35173,P56567,O08692,P29699,…	0.0144239	0.0649351
GO:0043588	skin development	P	Q62267,Q9D709,Q2VIS4,O88551,O35054,Q09PK2	P31786,Q9D1G0,Q80W54,Q9R1J0,Q8R422,Q5Y4Y6,Q01279,Q61001,Q04207,O88898,Q925H1,Q5MPP0,O70456,P02535,Q80X90,Q3TTY5,P47930,Q9ET54,P34056,Q0VAV2,Q61207,Q62266,Q9Z2K1,Q62267,P10107,E9Q557,Q9QYB1,Q08189,Q9WV54,Q9D952,Q8CGN8,Q9EQG3,Q9JLF6,Q61187,O70556,Q9JI11,P31938,P70677,P22437,Q3TKT4,P97431,P46938,Q9QWL7,Q02248,P06797,Q9R0H5,Q8VCW2,Q9Z320,Q9D709,Q64430,Q9Z331,P50446,Q9R269,Q8VHD8,P48997,P18165,P10287,…	0.0168721	0.0545455
GO:0042573	retinoic acid metabolic process	P	P62965,O54909	Q00915,P22935,P24549,Q8VCH7,P62965,O54909,P00184,Q8K023,Q64437,P00329,Q920A5	0.0172541	0.181818
GO:0090183	regulation of kidney development	P	P42225,Q9D695	Q02248,P42225,P05622,Q9D695,O54890,P46938,P11859,Q9QYH6,Q8BGV3,Q60994,P41245	0.0172541	0.181818
GO:0019840	isoprenoid binding	F	P62965,Q08652	Q05816,P22935,P62965,Q63886,Q07113,Q00915,Q9EPC5,Q08652,Q00724,Q64437,Q8K2I1	0.0172541	0.181818
GO:0004745	retinol dehydrogenase activity	F	Q7TQA3,O54909	Q8K023,Q64437,Q9QYF1,P00329,Q7TQA3,Q8BYK4,O88451,O54909,Q8CHS7,Q8VCH7,Q8K3P0	0.0172541	0.181818
GO:0061135	endopeptidase regulator activity	F	P35175,Q9D695,P35173,P56567,O55042	Q62426,P35175,P01027,Q00896,P22599,Q9JMA1,P21460,Q00897,Q61838,Q9WUP7,P28666,P28665,P01029,P06684,P97430,P70124,Q60854,Q9D154,P70296,P07759,P19324,P32261,Q91WP6,P97298,Q03734,P12388,Q5I2A0,Q9D7P9,O08800,Q8K1K6,Q61704,Q9ESB3,A6X935,Q61247,Q61702,Q07456,Q61703,Q8BYY9,P49182,Q63870,P97290,Q06770,Q80X76,Q7TMF5,P11859,Q8R422,Q8R121,Q9D695,Q9EPX2,P12023,Q8BJD1,Q9CQV3,Q2UY11,P35173,P56567,O08692,P29699,…	0.017643	0.0617284
GO:0008610	lipid biosynthetic process	P	P36423,Q8BHI7,Q9D0S9,P53798,Q8C0I1,Q9D6J1,P60202,O54909,P11589	Q9R0Q7,P34884,Q9JM51,P04441,Q9DB60,P22437,Q9JHF7,Q8BWM0,P36423,Q50L41,Q00915,P22935,P24549,Q8VCH7,P42867,O70152,Q9D1Q4,Q99LV7,Q9WTK3,Q91YL7,Q3UUQ7,Q91V92,O35678,P19096,Q5MPP0,O70503,Q5SWU9,P55096,P13516,P50171,Q91VT4,E9Q4Z2,Q9DCS3,O54950,Q6T707,Q5EG47,Q8R3F5,P11152,Q9D404,O09005,Q99J39,Q80W40,Q9CZW4,Q9JLJ5,Q9EQC4,Q9D2Y9,Q8BHI7,Q60714,P39654,Q922E4,Q8BGS7,Q61469,Q91ZV4,Q8K3K7,Q80UP3,Q9JK48,O88673,…	0.0180044	0.0422535
GO:1990931	RNA N6-methyladenosine dioxygenase activity	F	Q8BGW1	Q8BGW1	0.0188183	1
GO:0047044	androstan-3-alpha,17-beta-diol dehydrogenase activity	F	O54909	O54909	0.0188183	1
GO:0086037	sodium:potassium-exchanging ATPase activity involved in regulation of cardiac muscle cell membrane potential	F	Q6PIC6	Q6PIC6	0.0188183	1
GO:0008609	alkylglycerone-phosphate synthase activity	F	Q8C0I1	Q8C0I1	0.0188183	1
GO:0051940	regulation of catecholamine uptake involved in synaptic transmission	P	O55042	O55042	0.0188183	1
GO:0038033	positive regulation of endothelial cell chemotaxis by VEGF-activated vascular endothelial growth factor receptor signaling pathway	P	P14602	P14602	0.0188183	1
GO:0019544	arginine catabolic process to glutamate	P	P29758	P29758	0.0188183	1
GO:0070350	regulation of white fat cell proliferation	P	Q8BGW1	Q8BGW1	0.0188183	1
GO:1903285	positive regulation of hydrogen peroxide catabolic process	P	O55042	O55042	0.0188183	1
GO:2000470	positive regulation of peroxidase activity	P	O55042	O55042	0.0188183	1
GO:0061798	GTP 3',8'-cyclase activity	F	Q5RKZ7	Q5RKZ7	0.0188183	1
GO:0016500	protein-hormone receptor activity	F	P11589	P11589	0.0188183	1
GO:0007256	activation of JNKK activity	P	Q80XI6	Q80XI6	0.0188183	1
GO:0030916	otic vesicle formation	P	O70548	O70548	0.0188183	1
GO:0035516	oxidative DNA demethylase activity	F	Q8BGW1	Q8BGW1	0.0188183	1
GO:0070627	ferrous iron import	P	Q9D7P6	Q9D7P6	0.0188183	1
GO:0034240	negative regulation of macrophage fusion	P	P42225	P42225	0.0188183	1
GO:0035514	DNA demethylase activity	F	Q8BGW1	Q8BGW1	0.0188183	1
GO:0061799	cyclic pyranopterin monophosphate synthase activity	F	Q5RKZ7	Q5RKZ7	0.0188183	1
GO:1990443	peptidyl-threonine autophosphorylation	P	P11798	P11798	0.0188183	1
GO:1904307	response to desipramine	P	O55042	O55042	0.0188183	1
GO:1900390	regulation of iron ion import	P	Q9D7P6	Q9D7P6	0.0188183	1
GO:1904438	regulation of ferrous iron import across plasma membrane	P	Q9D7P6	Q9D7P6	0.0188183	1
GO:0042245	RNA repair	P	Q8BGW1	Q8BGW1	0.0188183	1
GO:1990984	tRNA demethylase activity	F	Q8BGW1	Q8BGW1	0.0188183	1
GO:0035553	oxidative single-stranded RNA demethylation	P	Q8BGW1	Q8BGW1	0.0188183	1
GO:0035847	uterine epithelium development	P	P09803	P09803	0.0188183	1
GO:0042335	cuticle development	P	Q9D709	Q9D709	0.0188183	1
GO:0071449	cellular response to lipid hydroperoxide	P	Q91VS7	Q91VS7	0.0188183	1
GO:0072135	kidney mesenchymal cell proliferation	P	P42225	P42225	0.0188183	1
GO:0072162	metanephric mesenchymal cell differentiation	P	P42225	P42225	0.0188183	1
GO:0035846	oviduct epithelium development	P	P09803	P09803	0.0188183	1
GO:0099520	ion antiporter activity involved in regulation of presynaptic membrane potential	F	Q6PIC6	Q6PIC6	0.0188183	1
GO:0004587	ornithine-oxo-acid transaminase activity	F	P29758	P29758	0.0188183	1
GO:0019493	arginine catabolic process to proline	P	P29758	P29758	0.0188183	1
GO:0016014	dystrobrevin complex	C	Q9D2N4	Q9D2N4	0.0188183	1
GO:0035513	oxidative RNA demethylation	P	Q8BGW1	Q8BGW1	0.0188183	1
GO:0051622	negative regulation of norepinephrine uptake	P	O55042	O55042	0.0188183	1
GO:1903544	response to butyrate	P	O88551	O88551	0.0188183	1
GO:0004310	farnesyl-diphosphate farnesyltransferase activity	F	P53798	P53798	0.0188183	1
GO:1904234	positive regulation of aconitate hydratase activity	P	Q9D7P6	Q9D7P6	0.0188183	1
GO:1903545	cellular response to butyrate	P	O88551	O88551	0.0188183	1
GO:0033256	I-kappaB/NF-kappaB complex	C	Q9WTK5	Q9WTK5	0.0188183	1
GO:0072136	metanephric mesenchymal cell proliferation involved in metanephros development	P	P42225	P42225	0.0188183	1
GO:0043734	DNA-N1-methyladenine dioxygenase activity	F	Q8BGW1	Q8BGW1	0.0188183	1
GO:0070341	fat cell proliferation	P	Q8BGW1	Q8BGW1	0.0188183	1
GO:0015684	ferrous iron transport	P	Q9D7P6	Q9D7P6	0.0188183	1
GO:0060732	positive regulation of inositol phosphate biosynthetic process	P	O55042	O55042	0.0188183	1
GO:0003332	negative regulation of extracellular matrix constituent secretion	P	Q8C138	Q8C138	0.0188183	1
GO:1903348	positive regulation of bicellular tight junction assembly	P	O88551	O88551	0.0188183	1
GO:0051584	regulation of dopamine uptake involved in synaptic transmission	P	O55042	O55042	0.0188183	1
GO:0072161	mesenchymal cell differentiation involved in kidney development	P	P42225	P42225	0.0188183	1
GO:0070673	response to interleukin-18	P	O88551	O88551	0.0188183	1
GO:0099573	glutamatergic postsynaptic density	C	P11798	P11798	0.0188183	1
GO:0035552	oxidative single-stranded DNA demethylation	P	Q8BGW1	Q8BGW1	0.0188183	1
GO:0051945	negative regulation of catecholamine uptake involved in synaptic transmission	P	O55042	O55042	0.0188183	1
GO:0002268	follicular dendritic cell differentiation	P	Q9WTK5	Q9WTK5	0.0188183	1
GO:0008426	protein kinase C inhibitor activity	F	P14602	P14602	0.0188183	1
GO:0098707	ferrous iron import across plasma membrane	P	Q9D7P6	Q9D7P6	0.0188183	1
GO:0004796	thromboxane-A synthase activity	F	P36423	P36423	0.0188183	1
GO:0003839	gamma-glutamylcyclotransferase activity	F	Q9D7X8	Q9D7X8	0.0188183	1
GO:0072308	negative regulation of metanephric nephron tubule epithelial cell differentiation	P	P42225	P42225	0.0188183	1
GO:1903282	regulation of glutathione peroxidase activity	P	O55042	O55042	0.0188183	1
GO:1903874	ferrous iron transmembrane transport	P	Q9D7P6	Q9D7P6	0.0188183	1
GO:0051996	squalene synthase activity	F	P53798	P53798	0.0188183	1
GO:0016103	diterpenoid catabolic process	P	P62965	P62965	0.0188183	1
GO:0072183	negative regulation of nephron tubule epithelial cell differentiation	P	P42225	P42225	0.0188183	1
GO:0032227	negative regulation of synaptic transmission, dopaminergic	P	O55042	O55042	0.0188183	1
GO:0002266	follicular dendritic cell activation	P	Q9WTK5	Q9WTK5	0.0188183	1
GO:0035515	oxidative RNA demethylase activity	F	Q8BGW1	Q8BGW1	0.0188183	1
GO:0034653	retinoic acid catabolic process	P	P62965	P62965	0.0188183	1
GO:0036276	response to antidepressant	P	O55042	O55042	0.0188183	1
GO:0010121	arginine catabolic process to proline via ornithine	P	P29758	P29758	0.0188183	1
GO:2001012	mesenchymal cell differentiation involved in renal system development	P	P42225	P42225	0.0188183	1
GO:0005954	protein kinase complex	C	P11798	P11798	0.0188183	1
GO:1904232	regulation of aconitate hydratase activity	P	Q9D7P6	Q9D7P6	0.0188183	1
GO:1904439	negative regulation of ferrous iron import across plasma membrane	P	Q9D7P6	Q9D7P6	0.0188183	1
GO:0061772	drug transport across blood-nerve barrier	P	O88551	O88551	0.0188183	1
GO:0033257	Bcl3/NF-kappaB2 complex	C	Q9WTK5	Q9WTK5	0.0188183	1
GO:1903284	positive regulation of glutathione peroxidase activity	P	O55042	O55042	0.0188183	1
GO:0070343	white fat cell proliferation	P	Q8BGW1	Q8BGW1	0.0188183	1
GO:0071600	otic vesicle morphogenesis	P	O70548	O70548	0.0188183	1
GO:0090362	positive regulation of platelet-derived growth factor production	P	Q9D695	Q9D695	0.0188183	1
GO:0070344	regulation of fat cell proliferation	P	Q8BGW1	Q8BGW1	0.0188183	1
GO:0005009	insulin-activated receptor activity	F	P11589	P11589	0.0188183	1
GO:0060468	prevention of polyspermy	P	Q9R160	Q9R160	0.0188183	1
GO:0044323	retinoic acid-responsive element binding	F	P97500	P97500	0.0188183	1
GO:0051585	negative regulation of dopamine uptake involved in synaptic transmission	P	O55042	O55042	0.0188183	1
GO:0062013	positive regulation of small molecule metabolic process	P	P11589,Q8BHI7,O55042,Q9D7P6	P11589,Q8BH59,O70362,P05480,Q60823,Q3U1J4,P56212,Q6P2K6,Q06180,Q9Z0J4,P10107,P04441,Q9WTU6,P47713,Q8JZR0,P97742,Q61285,P48410,P61965,Q9JHD2,P37040,Q920E5,P32020,Q99J08,P06728,P11859,Q8BHI7,Q62417,Q8VEH5,P63158,P13707,P34884,P49769,Q5EG47,Q9WUZ9,P12023,Q9Z1M0,Q60994,P81117,Q9Z2A7,Q99J39,O88587,O55042,Q8VCH7,P25799,Q99LX0,Q9D7P6,Q01853,P09411,O88990,Q9CQ54,P42227,P31938,P00405,Q64373	0.0192978	0.0727273
GO:0044255	cellular lipid metabolic process	P	P36423,Q08652,O54909,O55042,Q8BHI7,P53798,Q8C0I1,P12791,Q9D6J1,P62965,Q7TQA3,Q8C138,P60202	Q921H8,P51660,Q91VE0,Q9QYR9,Q9R0H0,Q99PU5,Q61285,P48410,O09012,Q99N16,Q9R0Q7,P34884,Q9JM51,P04441,Q9DB60,P22437,Q9JHF7,Q8BWM0,P36423,Q50L41,P45376,P28474,P45377,Q64437,Q9QYF1,P24549,P00329,Q08652,O54909,Q9QXE0,P41216,O55137,Q8JZR0,Q8JZN5,Q08857,Q60714,P97742,O88561,Q00915,P22935,Q8VCH7,Q05421,P00184,Q9DBE8,P42867,Q3UUQ7,O70152,Q9D1Q4,Q99LV7,Q9WTK3,Q91YL7,O70362,P11404,P04117,P56395,P52503,P01027,…	0.0193549	0.0353261
GO:0048871	multicellular organismal homeostasis	P	Q8BGW1,P11589,P09803,Q2VIS4,O88551,O35054,Q9D709	P11352,P50544,P51174,P42227,Q8BGW1,P25085,P45376,Q02248,P09055,Q5SWU9,P63094,Q64314,P28481,P05622,P46938,Q64739,P08228,P10287,Q9DBI2,P56695,Q01341,Q02013,P97792,Q8CJ40,Q5PR69,Q9Z1Z2,Q00724,P11589,Q60714,P61922,P09803,P13516,P17439,Q9D8B3,Q9Z1W9,Q8BH97,P49935,P47713,P43406,P09581,P51150,P63001,Q05144,O70370,P35276,Q05117,O89023,P55097,P05480,P22682,Q8BP00,O35600,Q8VHN7,P41241,Q9ES52,P56528,Q9Z1M0,…	0.0193889	0.0479452
GO:0032496	response to lipopolysaccharide	P	P42225,Q9Z0E6,Q91VS7,O55042,O88551,Q9WTK5	P63085,Q63844,Q80WJ7,P47811,P42225,P25911,Q61805,P70671,P10810,Q18PI6,Q61171,P08071,P34884,P20444,Q62192,P59808,Q61009,P20152,P63158,Q9EPB4,P09405,Q9QUI0,P30681,Q61830,P19157,P51437,O08529,Q08857,P25085,Q9Z0E6,P16460,P11672,Q9EPU0,P27612,Q99PV0,Q61823,Q8R460,P28033,Q8CCS6,P28293,P29452,Q9BCZ4,Q9D7S9,P05480,P30285,Q8CGY8,Q9QYY1,Q9JM90,P25799,P31996,P97797,Q9DBR0,Q04207,Q9D6Z6,Q9JLJ0,Q3U108,Q8K2T8,…	0.0197941	0.0526316
GO:0016765	transferase activity, transferring alkyl or aryl (other than methyl) groups	F	P53798,Q91VS7,Q8C0I1	Q91WT9,Q920E5,P53798,Q8K2I1,P15626,P10649,P48774,O09131,P19157,Q9WVL0,Q64471,Q91VS7,P24472,Q9DCM2,Q99L20,Q9JM51,P30115,O89112,P30355,Q9JHF7,P13745,P22907,Q3THS6,Q61239,Q8BUY9,Q9JHK4,Q64674,Q8C0I1,P97355,Q99J77,Q99J08	0.0198182	0.0967742
GO:0016010	dystrophin-related glycoprotein complex	C	P82348,Q9D2N4	P82347,Q62165,P82349,P82348,Q9D2N4,P11531,Q61234,Q8BZF8,Q99L88,P51637,Q61235,Q62147	0.0204539	0.166667
GO:0005254	chloride channel activity	F	Q9QX15,O35054	Q9QX15,Q8BH79,Q6P9J9,P86044,Q75UR0,Q9WVD4,Q8BHJ7,Q9Z1Q5,Q9QYB1,Q9D7P7,O35054,Q99LI2	0.0204539	0.166667
GO:0035336	long-chain fatty-acyl-CoA metabolic process	P	Q8BHI7,Q7TNT2	P41216,Q8JZR0,Q9JLJ5,Q9EQC4,Q9D2Y9,Q8BHI7,Q9QUJ7,Q91V12,Q7TNT2,Q922J9,Q9Z2A7,Q9CQJ0	0.0204539	0.166667
GO:0090665	glycoprotein complex	C	P82348,Q9D2N4	P11531,Q61234,Q8BZF8,Q99L88,P82347,P51637,Q62165,Q61235,P82349,Q62147,P82348,Q9D2N4	0.0204539	0.166667
GO:0005576	extracellular region	C	Q61555,P56567,P11589,P01668,Q9CYL5,O55042,Q9R013,Q61955,Q9D695,Q8BLX7,Q9Z0E6,P18524,P06327,Q9JHQ0,Q5EBG6,Q9CYH2,P97347,Q9D3H2,Q3V188,Q91Z98	P08226,P02468,Q61292,Q60675,P97927,Q61001,A2ASQ1,Q62010,P70663,Q80YX1,Q61554,Q9QZJ6,Q9D1H9,C0HKD8,P55002,Q61555,Q8K0E8,Q8VCM7,E9PV24,P11276,P35441,Q61247,P51885,P11087,Q01149,P28481,P08121,P08122,P02463,Q9QZS0,O88207,Q3U962,Q61245,Q60847,P14106,P07724,Q921I1,P07356,P14206,O09131,Q8BPB5,P21460,P57016,P82198,P97298,P09055,P02469,Q9CW03,P10493,Q61739,Q05793,A2A863,Q61087,O35566,P07214,P55772,P25785,…	0.0235125	0.0296736
GO:0005882	intermediate filament	C	P46660,Q6IFZ6,Q61414,Q61765	P20152,P31001,P15331,P48678,P14733,P21619,O55135,P08551,P08553,P11531,P19246,P46660,P97333,Q61781,Q8VED5,Q6IFZ6,Q922U2,P04104,Q9Z331,P50446,P02535,O89094,Q8R0W0,Q0VBK2,Q8BK63,P08730,Q3TTY5,Q9R0H5,Q148V8,Q9ERE2,P07744,Q6IME9,Q3UV17,P05784,Q99M73,Q9Z2K1,Q9QWL7,Q61414,P63017,Q02257,Q01768,P15532,Q6IFX2,Q8VCW2,Q70IV5,Q99PS0,Q9Z320,Q99104,P28293,P03995,Q61765,Q9EPM5,P23242,A1L317,Q62168,Q8CCX5,B1AQ75,…	0.0243366	0.0677966
GO:0050878	regulation of body fluid levels	P	Q8C138,P09803,Q2VIS4,O88551,O35054,Q9D709	Q6P9J9,P45376,P04919,Q01341,P56695,O88662,Q02013,P08752,Q8C5L6,P23242,Q61462,P48036,O35640,P01027,P32261,Q8BH61,Q01339,P20918,O08677,P19221,E9PV24,P26262,P49182,Q7TQ95,P97290,Q9CRC0,Q9Z1T1,O88428,Q8R121,Q9ERI2,P06683,P33587,Q80YC5,O88947,Q9JHH6,O08742,Q8CIZ8,O88783,P07356,Q91V41,P15532,P49817,O08528,P05202,Q00519,P08030,P13439,P00405,B2RQC6,P42232,O35435,Q9JIM1,A2CG49,Q07076,P20491,Q9ESB3,P08226,…	0.0247984	0.05
GO:0001676	long-chain fatty acid metabolic process	P	P12791,Q8C138,P60202	O35678,Q63844,P55249,P39654,Q91WC9,Q64429,P47713,Q99N16,Q9EP75,P22437,P33267,P12791,P12790,Q05421,P51174,P48410,P54310,Q8C138,Q9QYS9,P60202,Q99PU5,Q99104,P34914,Q91V12,P41216,O55137,Q8JZR0,Q8JZN5,Q91VE0,Q9QYR9,Q08857,Q60714,P97742,O88561	0.0253409	0.0882353
GO:0071230	cellular response to amino acid stimulus	P	Q9CR84,P09803,Q8BLX7	Q8BMJ2,Q6WKZ8,Q9JLN9,O09172,P97494,Q61093,Q61462,Q8BKX1,Q9CR84,Q04857,P11087,Q01149,O08529,Q9D1L9,P09803,Q60668,P16460,P08121,Q99K70,Q8BKC5,O88653,P28862,P28033,Q64373,Q3U962,Q80X95,Q01279,O88508,P13864,P33434,Q8BLX7,P26618,P02463,Q64430	0.0253409	0.0882353
GO:0002237	response to molecule of bacterial origin	P	P42225,Q91VS7,O55042,O88551,Q9WTK5,Q9Z0E6	P63085,Q63844,Q80WJ7,P47811,P42225,P25911,Q61805,P70671,P10810,Q18PI6,Q61171,P08071,P34884,P20444,Q62192,P59808,P43406,Q9EPQ1,Q9D2Q8,P63038,P19253,P28654,Q9DAS9,P30681,O55143,P28474,P09671,P10518,P16330,P11247,Q91VS7,Q9CX86,O09106,Q8BW75,Q9JM51,O88587,P20108,P50285,P07214,P70677,Q63886,O55042,O88551,Q05117,P28033,P28293,P09470,P42232,O08573,P29452,Q9WTQ5,O70145,Q9Z2V4,P39447,P97430,P23242,Q5SSL4,…	0.0257078	0.0495868
GO:0031224	intrinsic component of membrane	C	P09803,Q09PK2,Q91VS7,Q7TQA3,P60202,Q9D6J1,O88551,O35054,Q9R1Q7,P53798,Q6E1M8,P36423,Q8R143,Q8K385,Q8C138,Q9R160,Q9D709,P57096,Q8VEN2,Q9QX15,P82348,Q8BHI7,O54909,O88935,Q7TNT2,Q9D8T4,Q6PIC6,Q9CR84	Q80UU9,P56395,Q8R429,P51881,P53810,Q8BMK4,O55022,P41216,Q9CYN2,Q9CPQ1,Q91YQ5,Q91WS0,P35564,B1AXP6,Q9CQB5,Q9CQC7,Q8VDN2,O70404,P49817,Q9CQS8,Q9QY76,Q9CPQ3,Q922Q8,Q61830,P47739,P62814,Q9WV55,P24668,Q9R0Q3,Q9D1D4,Q9CQX2,Q9CR68,P49300,Q9D6J5,Q07813,Q64133,Q9D6U8,Q9CQ54,O08547,P03930,P14483,Q61029,P0DN34,Q9D0F3,Q9CZH7,P01867,Q91V61,Q91VC4,O70439,Q91YH5,Q8JZR0,P37040,Q5MPP0,Q8VCI5,Q8BFZ9,Q9D379,Q99KF1,…	0.0265294	0.0267176
GO:0097066	response to thyroid hormone	P	Q6PIC6,Q9CR84	P10605,P63242,Q6PIC6,P26043,P49935,O09172,P97494,Q9DCC8,Q9CR84,P48036,P45376,P07356,P04186,P17439	0.0275235	0.142857
GO:0048730	epidermis morphogenesis	P	Q9D709,Q2VIS4	Q9QWL7,Q02248,P06797,Q9R0H5,Q8VCW2,Q9Z320,Q5Y4Y6,O88898,Q9D709,Q64430,Q2VIS4,Q3TKT4,Q9R0E1,P34056	0.0275235	0.142857
GO:0051707	response to other organism	P	P42225,P18524,P06327,P14602,Q62293,Q9Z0E6,P12791,Q91VS7,O55042,O88551,Q9WTK5	Q64010,P11247,Q09014,Q3UP87,Q8CJ91,P49290,Q61878,Q9EPB4,P42225,Q9JLJ1,Q8VCF0,Q3TBT3,Q60953,Q6Q899,Q3UIR3,Q8CAS9,Q60520,P01887,P36371,P10810,Q91VE3,Q9D2Q8,P62821,O35639,Q91V41,P01837,P01901,P01863,P06330,Q61646,P51437,P01867,P18528,P18527,P08905,P18524,P04223,P01872,P01806,P20491,P18525,P01796,Q91ZW8,P11672,P01820,P01786,Q9JI48,P01868,P28033,P60603,P01795,P06327,P28867,P01821,P18531,P01759,Q8R4Y4,…	0.0281337	0.0358306
GO:0043207	response to external biotic stimulus	P	P42225,P18524,P06327,P14602,Q62293,Q9Z0E6,P12791,Q91VS7,O55042,O88551,Q9WTK5	Q64010,P11247,Q09014,Q3UP87,Q8CJ91,P49290,Q61878,Q9EPB4,P42225,Q9JLJ1,Q8VCF0,Q3TBT3,Q60953,Q6Q899,Q3UIR3,Q8CAS9,Q60520,P01887,P36371,P10810,Q91VE3,Q9D2Q8,P62821,O35639,Q91V41,P01837,P01901,P01863,P06330,Q61646,P51437,P01867,P18528,P18527,P08905,P18524,P04223,P01872,P01806,P20491,P18525,P01796,Q91ZW8,P11672,P01820,P01786,Q9JI48,P01868,P28033,P60603,P01795,P06327,P28867,P01821,P18531,P01759,Q8R4Y4,…	0.0281337	0.0358306
GO:0046983	protein dimerization activity	F	P14602,Q9D7X8,Q5EBG6,P09803,Q91VS7,Q9Z0E6,P11798,Q9CYL5,P42225,O54909,Q9D7I5,Q99JZ0,Q99J45,Q80XI6,P46660,O88935	P32848,P16045,P58771,P58774,P15626,O88844,P16858,P10107,Q9JI91,P14602,Q99LX0,P10649,P21550,P08249,P57780,O08709,Q6IRU2,Q8VDD5,Q7TPR4,P11499,O88990,P17751,P35700,Q9CZX8,P14824,P23927,O54962,P40142,P17182,Q8R429,P08226,P68040,Q8BTM8,P13707,P97352,Q9EPB4,P06728,P30275,Q9CYZ2,Q61937,P14148,P28650,P07901,Q64105,O35678,P50543,Q9D8B3,Q62234,Q8BL66,Q9WU78,P24270,Q9D0K2,Q8QZT1,P57759,Q9CQB5,P47857,P14069,…	0.0293009	0.031068
GO:0019814	immunoglobulin complex	C	P18524,P06327,P01668	P01872,P01837,P01863,P06330,P01867,P18528,P18527,P18524,P01806,P18525,P01796,P01820,P01786,P01868,P01795,P06327,P01821,P18531,P01759,P01592,P01660,P01644,P01648,P01646,P01637,P01668,P01636,P01635,P01631,P01634,P04940,P01629,P01633,P01680,P01723,P84750	0.0294365	0.0833333
GO:0003008	system process	P	O70548,Q5SX40,Q5EBG6,P09803,Q9D3H2,Q6PIC6,Q61955,P42225,Q8VEE1,Q8BGW1,P36423,P82348,O55042,Q9QUR7,O35054	Q64726,P26040,Q9Z2D6,Q9QZQ0,Q03391,Q09XV5,P11859,Q9QUI0,Q00612,P15089,P21812,Q9CXI5,P70296,P50462,Q8VDN2,O55143,Q6PIE5,P49817,P09542,Q9CQM9,Q91Z83,Q02566,P51667,P09541,P20444,P70699,Q61165,P0DP27,Q3ULJ0,P11531,Q61234,P51637,O09161,E9Q401,Q61247,P34884,P19123,D3Z7P3,Q9JJN6,P20801,P13542,P58252,Q9QZ47,P13412,P13541,Q3MI48,Q6URW6,O70548,Q3UZA1,O88346,Q8BZ71,Q9Z2Y3,Q1XH17,O89017,Q8VDG5,P82347,P46938,…	0.0295106	0.0317125
GO:0032982	myosin filament	C	Q5SX40,A2AQP0	A2AAJ9,Q8VDD5,Q6URW6,Q61879,Q5SX40,Q5SX39,P13542,O08638,Q5XKE0,Q62234,P13541,Q91Z83,Q02566,P70402,A2AQP0	0.0313745	0.133333
GO:0042572	retinol metabolic process	P	Q7TQA3,O54909	Q00915,P07309,Q64437,Q9QYF1,P24549,P00329,Q9ERI6,Q7TQA3,Q8BYK4,O88451,Q00724,O54909,Q8VCH7,P00184,Q64429	0.0313745	0.133333
GO:0098659	inorganic cation import across plasma membrane	P	Q9D7P6,Q6PIC6	Q60738,Q925B0,P70387,Q61165,Q9D7P6,P04925,Q8VDN2,Q6PIE5,Q6PIC6,P14094,P97370,P55012,Q924N4,Q99MR3,Q9WVL3	0.0313745	0.133333
GO:2001222	regulation of neuron migration	P	P09803,P11798	P08121,P42227,Q9WV60,Q91Z67,Q80Z71,Q8BTM8,Q8K2Q9,P27612,Q60875,Q8CHG7,P09803,P11798,P28652,B2RXS4,Q9Z0F8	0.0313745	0.133333
GO:0099587	inorganic ion import across plasma membrane	P	Q9D7P6,Q6PIC6	Q60738,Q925B0,P70387,Q61165,Q9D7P6,P04925,Q8VDN2,Q6PIE5,Q6PIC6,P14094,P97370,P55012,Q924N4,Q99MR3,Q9WVL3	0.0313745	0.133333
GO:0031057	negative regulation of histone modification	P	Q7TQA3,O55042	P97807,Q9JIA7,Q9QZQ8,Q7TQA3,O88712,O55042,Q6ZQ88,P13864,Q62383,Q9Z0H3,Q7TQI3,G5E870,Q60520,Q9D906,Q99J83	0.0313745	0.133333
GO:0007215	glutamate receptor signaling pathway	P	Q6PIC6,P11798	Q91WC9,Q9Z2Y3,Q6PIC6,P11798,P12023,P23819,A2CG49,P04925,Q99LX0,P18760,O35639,Q9JM52,P21279,P57716,P35922	0.0313745	0.133333
GO:0005253	anion channel activity	F	Q9QX15,O35054	Q9QX15,Q8BH79,Q6P9J9,P86044,Q75UR0,Q9WVD4,Q9Z1Q5,Q9QYB1,Q9D7P7,O35054,Q99LI2,Q8BHJ7,Q60932,Q60930,Q60931	0.0313745	0.133333
GO:0008299	isoprenoid biosynthetic process	P	O54909,P53798	Q00915,P22935,P24549,Q8VCH7,P58044,Q8JZK9,P54869,Q8BLN5,Q99JF5,Q9R008,Q920E5,O54909,P00184,Q8K023,P53798	0.0313745	0.133333
GO:0009607	response to biotic stimulus	P	P42225,P18524,P06327,P14602,Q62293,Q9Z0E6,P12791,Q91VS7,O55042,O88551,Q9WTK5	Q64010,P11247,Q09014,Q3UP87,Q8CJ91,P49290,Q61878,Q9EPB4,P42225,Q9JLJ1,Q8VCF0,Q3TBT3,Q60953,Q6Q899,Q3UIR3,Q8CAS9,Q60520,P01887,P36371,P10810,Q91VF2,Q91VE3,Q9ESB3,P63158,P63038,Q9EP73,Q9D2Q8,P62821,O35639,Q91V41,P01837,P01901,P01863,P06330,Q61646,P51437,P01867,P18528,P18527,P08905,P18524,P04223,P01872,P01806,P20491,P18525,P01796,Q91ZW8,P11672,P01820,P01786,Q9JI48,P01868,P28033,P60603,P01795,P06327,…	0.0331481	0.0349206
GO:0061134	peptidase regulator activity	F	P35175,Q9D695,P35173,P56567,O55042	Q62426,P35175,P01027,Q00896,P22599,Q9JMA1,P21460,Q00897,Q61838,Q9WUP7,P28666,P28665,P01029,P06684,P97430,P70124,Q60854,Q9D154,P70296,P07759,P19324,P32261,Q91WP6,P97298,Q03734,P12388,Q5I2A0,Q9D7P9,O08800,Q8K1K6,Q61704,Q9ESB3,A6X935,Q61247,Q61702,Q07456,Q61703,Q8BYY9,P49182,Q63870,P97290,Q06770,Q80X76,Q7TMF5,P11859,Q8R422,Q8R121,Q9D695,Q9EPX2,P12023,Q8BJD1,Q9CQV3,Q2UY11,P35173,P56567,O08692,P29699,…	0.0338366	0.0520833
GO:0035337	fatty-acyl-CoA metabolic process	P	Q7TNT2,Q8BHI7	Q7TNT2,Q922J9,Q9Z2A7,Q9CQJ0,P41216,Q8JZR0,Q9JLJ5,Q9EQC4,Q9D2Y9,Q8BHI7,Q9QUJ7,P51660,P48410,Q91V12,Q60759,Q8QZT1	0.0354244	0.125
GO:0043616	keratinocyte proliferation	P	Q7TQA3,Q61955	Q3TWW8,P46938,Q9JLF6,O88898,P10287,O35516,O70456,Q8R0W0,P06797,Q8R422,O70589,Q3TTY5,Q9WTR5,Q7TQA3,Q61955,P97431	0.0354244	0.125
GO:0034754	cellular hormone metabolic process	P	P62965,Q7TQA3,O54909	Q00915,P22935,P24549,Q8VCH7,Q9QZ82,Q9DBG1,P32020,Q61009,O70503,P50171,O88736,Q8K023,Q9EQ06,Q6ZQM8,O35469,P51660,Q8R0X7,Q8BUL6,O88587,P52840,P00184,Q64429,P26618,Q4PZA2,Q9QUN9,P62965,P42232,P27786,P07309,Q64437,Q9QYF1,P00329,Q9ERI6,Q7TQA3,Q8BYK4,O88451,Q00724,O54909,Q920A5	0.0361961	0.0769231
GO:0043418	homocysteine catabolic process	P	Q8R016	Q8R016,Q91WT9	0.0372862	0.5
GO:0047023	androsterone dehydrogenase activity	F	O54909	Q8K023,O54909	0.0372862	0.5
GO:0099628	neurotransmitter receptor diffusion trapping	P	P11798	P11798,Q8BUV3	0.0372862	0.5
GO:0051583	dopamine uptake involved in synaptic transmission	P	O55042	O55042,Q99LX0	0.0372862	0.5
GO:0102966	arachidoyl-CoA:1-dodecanol O-acyltransferase activity	F	Q6E1M8	A2ADU9,Q6E1M8	0.0372862	0.5
GO:1901724	positive regulation of cell proliferation involved in kidney development	P	Q9D695	Q9D695,O54890	0.0372862	0.5
GO:1901722	regulation of cell proliferation involved in kidney development	P	Q9D695	Q9D695,O54890	0.0372862	0.5
GO:0051621	regulation of norepinephrine uptake	P	O55042	O55042,P60710	0.0372862	0.5
GO:0099576	regulation of protein catabolic process at postsynapse, modulating synaptic transmission	P	P09803	P09803,P46935	0.0372862	0.5
GO:0072273	metanephric nephron morphogenesis	P	P42225	Q02248,P42225	0.0372862	0.5
GO:0042363	fat-soluble vitamin catabolic process	P	P62965	P62965,Q99N16	0.0372862	0.5
GO:0050816	phosphothreonine residue binding	F	Q9QUR7	Q9QUR7,P46935	0.0372862	0.5
GO:0044611	nuclear pore inner ring	C	Q6ZQH8	Q99P88,Q6ZQH8	0.0372862	0.5
GO:0098711	iron ion import across plasma membrane	P	Q9D7P6	Q9D7P6,P70387	0.0372862	0.5
GO:0003337	mesenchymal to epithelial transition involved in metanephros morphogenesis	P	P42225	Q02248,P42225	0.0372862	0.5
GO:0015464	acetylcholine receptor activity	F	Q9JHQ0	Q91ZY2,Q9JHQ0	0.0372862	0.5
GO:0060467	negative regulation of fertilization	P	Q9R160	Q9R160,Q62010	0.0372862	0.5
GO:0072203	cell proliferation involved in metanephros development	P	P42225	P42225,P05622	0.0372862	0.5
GO:0000293	ferric-chelate reductase activity	F	Q8K385	Q8CI59,Q8K385	0.0372862	0.5
GO:1904715	negative regulation of chaperone-mediated autophagy	P	O55042	P16675,O55042	0.0372862	0.5
GO:0048665	neuron fate specification	P	P97500	Q3US41,P97500	0.0372862	0.5
GO:0002070	epithelial cell maturation	P	Q9D709	P23242,Q9D709	0.0372862	0.5
GO:0072126	positive regulation of glomerular mesangial cell proliferation	P	Q9D695	Q9D695,O54890	0.0372862	0.5
GO:0090360	platelet-derived growth factor production	P	Q9D695	Q9QYG0,Q9D695	0.0372862	0.5
GO:0071599	otic vesicle development	P	O70548	O70548,P28481	0.0372862	0.5
GO:0072257	metanephric nephron tubule epithelial cell differentiation	P	P42225	P46938,P42225	0.0372862	0.5
GO:0060576	intestinal epithelial cell development	P	P09803	P09803,Q8BZA9	0.0372862	0.5
GO:0072074	kidney mesenchyme development	P	P42225	P97471,P42225	0.0372862	0.5
GO:0051934	catecholamine uptake involved in synaptic transmission	P	O55042	Q99LX0,O55042	0.0372862	0.5
GO:0080019	fatty-acyl-CoA reductase (alcohol-forming) activity	F	Q7TNT2	Q7TNT2,Q922J9	0.0372862	0.5
GO:1990913	sperm head plasma membrane	C	Q9R160	P11499,Q9R160	0.0372862	0.5
GO:1905232	cellular response to L-glutamate	P	Q9CR84	Q8BKX1,Q9CR84	0.0372862	0.5
GO:0072307	regulation of metanephric nephron tubule epithelial cell differentiation	P	P42225	P42225,P46938	0.0372862	0.5
GO:1900116	extracellular negative regulation of signal transduction	P	Q61555	Q61554,Q61555	0.0372862	0.5
GO:0003339	regulation of mesenchymal to epithelial transition involved in metanephros morphogenesis	P	P42225	Q02248,P42225	0.0372862	0.5
GO:0070268	cornification	P	Q9D709	O89094,Q9D709	0.0372862	0.5
GO:0019008	molybdopterin synthase complex	C	Q5RKZ7	Q9Z224,Q5RKZ7	0.0372862	0.5
GO:0047196	long-chain-alcohol O-fatty-acyltransferase activity	F	Q6E1M8	A2ADU9,Q6E1M8	0.0372862	0.5
GO:0072075	metanephric mesenchyme development	P	P42225	P97471,P42225	0.0372862	0.5
GO:0070989	oxidative demethylation	P	Q8BGW1	Q4JK59,Q8BGW1	0.0372862	0.5
GO:0006696	ergosterol biosynthetic process	P	P53798	P53798,Q9ERY9	0.0372862	0.5
GO:0032914	positive regulation of transforming growth factor beta1 production	P	Q9D695	P51885,Q9D695	0.0372862	0.5
GO:0035583	sequestering of TGFbeta in extracellular matrix	P	Q61555	Q61554,Q61555	0.0372862	0.5
GO:1902958	positive regulation of mitochondrial electron transport, NADH to ubiquinone	P	Q9D7P6	Q99LX0,Q9D7P6	0.0372862	0.5
GO:0102965	alcohol-forming fatty acyl-CoA reductase activity	F	Q7TNT2	Q7TNT2,Q922J9	0.0372862	0.5
GO:0098953	receptor diffusion trapping	P	P11798	P11798,Q8BUV3	0.0372862	0.5
GO:0034239	regulation of macrophage fusion	P	P42225	P42225,O54885	0.0372862	0.5
GO:0098970	postsynaptic neurotransmitter receptor diffusion trapping	P	P11798	P11798,Q8BUV3	0.0372862	0.5
GO:0006982	response to lipid hydroperoxide	P	Q91VS7	Q91VS7,P06728	0.0372862	0.5
GO:0004311	farnesyltranstransferase activity	F	P53798	P53798,Q8K2I1	0.0372862	0.5
GO:0090494	dopamine uptake	P	O55042	Q99LX0,O55042	0.0372862	0.5
GO:0046725	negative regulation by virus of viral protein levels in host cell	P	P42225	Q9QY76,P42225	0.0372862	0.5
GO:0060575	intestinal epithelial cell differentiation	P	P09803	P09803,Q8BZA9	0.0372862	0.5
GO:0005550	pheromone binding	F	P11589	P11589,B5X0G2	0.0372862	0.5
GO:0072087	renal vesicle development	P	P42225	Q02248,P42225	0.0372862	0.5
GO:0035511	oxidative DNA demethylation	P	Q8BGW1	Q8BGW1,Q4JK59	0.0372862	0.5
GO:0072077	renal vesicle morphogenesis	P	P42225	Q02248,P42225	0.0372862	0.5
GO:0101006	protein histidine phosphatase activity	F	Q9D7I5	Q9DAK9,Q9D7I5	0.0372862	0.5
GO:1900115	extracellular regulation of signal transduction	P	Q61555	Q61554,Q61555	0.0372862	0.5
GO:1902956	regulation of mitochondrial electron transport, NADH to ubiquinone	P	Q9D7P6	Q99LX0,Q9D7P6	0.0372862	0.5
GO:0034242	negative regulation of syncytium formation by plasma membrane fusion	P	P42225	P42225,Q8R460	0.0372862	0.5
GO:2000295	regulation of hydrogen peroxide catabolic process	P	O55042	O55042,Q61646	0.0372862	0.5
GO:0038089	positive regulation of cell migration by vascular endothelial growth factor signaling pathway	P	P14602	P14602,Q9WTI7	0.0372862	0.5
GO:1905448	positive regulation of mitochondrial ATP synthesis coupled electron transport	P	Q9D7P6	Q99LX0,Q9D7P6	0.0372862	0.5
GO:0006307	DNA dealkylation involved in DNA repair	P	Q8BGW1	Q8BGW1,E9PZJ8	0.0372862	0.5
GO:0090361	regulation of platelet-derived growth factor production	P	Q9D695	Q9D695,Q9QYG0	0.0372862	0.5
GO:0051620	norepinephrine uptake	P	O55042	P60710,O55042	0.0372862	0.5
GO:0099148	regulation of synaptic vesicle docking	P	P11798	Q9Z2Q6,P11798	0.0372862	0.5
GO:1905446	regulation of mitochondrial ATP synthesis coupled electron transport	P	Q9D7P6	Q99LX0,Q9D7P6	0.0372862	0.5
GO:2000468	regulation of peroxidase activity	P	O55042	O55042,P19157	0.0372862	0.5
GO:0035581	sequestering of extracellular ligand from receptor	P	Q61555	Q61554,Q61555	0.0372862	0.5
GO:0070080	titin Z domain binding	F	O70548	Q9JI91,O70548	0.0372862	0.5
GO:0003340	negative regulation of mesenchymal to epithelial transition involved in metanephros morphogenesis	P	P42225	Q02248,P42225	0.0372862	0.5
GO:0071694	maintenance of protein location in extracellular region	P	Q61555	Q61554,Q61555	0.0372862	0.5
GO:0048769	sarcomerogenesis	P	O70548	A2ASS6,O70548	0.0372862	0.5
GO:0050252	retinol O-fatty-acyltransferase activity	F	Q6E1M8	Q9Z2A7,Q6E1M8	0.0372862	0.5
GO:0008204	ergosterol metabolic process	P	P53798	P53798,Q9ERY9	0.0372862	0.5
GO:0072124	regulation of glomerular mesangial cell proliferation	P	Q9D695	Q9D695,O54890	0.0372862	0.5
GO:0060693	regulation of branching involved in salivary gland morphogenesis	P	P09803	P16056,P09803	0.0372862	0.5
GO:1905242	response to 3,3',5-triiodo-L-thyronine	P	Q9CR84	Q9DCC8,Q9CR84	0.0372862	0.5
GO:0097180	serine protease inhibitor complex	C	Q61955	Q60854,Q61955	0.0372862	0.5
GO:0098989	NMDA selective glutamate receptor signaling pathway	P	P11798	P11798,A2CG49	0.0372862	0.5
GO:0010726	positive regulation of hydrogen peroxide metabolic process	P	O55042	P00405,O55042	0.0372862	0.5
GO:0060066	oviduct development	P	P09803	P09803,Q02248	0.0372862	0.5
GO:0031092	platelet alpha granule membrane	C	O55042	P07214,O55042	0.0372862	0.5
GO:0072283	metanephric renal vesicle morphogenesis	P	P42225	Q02248,P42225	0.0372862	0.5
GO:0001101	response to acid chemical	P	P09803,Q8BLX7,P36423,Q6PIC6,O88551,Q9CR84	P45376,P11531,P40240,Q64471,Q9JJK2,P24270,Q05421,Q04857,P11087,Q01149,O08529,Q9D1L9,P09803,Q60668,P16460,P08121,Q99K70,Q8BKC5,Q8BMJ2,O88653,P28862,P28033,Q64373,Q3U962,Q80X95,Q01279,O88508,P13864,P33434,Q8BLX7,P26618,P02463,Q9JLN9,Q64430,Q61024,P00329,Q9JM51,O35609,P49935,Q00724,P23242,Q9D7E3,P47877,P56528,Q07113,Q8CHC4,P19157,P09671,P07214,P41216,Q9D2R0,Q6R891,O88393,Q00899,P18760,Q9QUI0,P10518,…	0.0383944	0.0451128
GO:0044438	microbody part	C	Q91VS7,Q8C0I1,Q7TNT2	P41216,P24270,P49817,Q9CQ92,P61028,Q8VCI5,Q91VS7,P55096,Q9R0H0,Q99LB2,Q9R0A0,Q9JJW0,Q8VCF0,Q99MZ7,Q61285,P48410,O09012,O70579,Q9QXY9,Q5XG73,P98192,Q9QUJ7,Q9CZW4,P99029,P63038,P35700,Q921H8,Q9JHR7,P51660,P32020,Q99JF5,Q9WUR2,Q9EPL9,P58137,Q8C0L6,Q8C0I1,Q99J39,Q6P6M5,Q7TNT2,Q922J9	0.038612	0.075
GO:0044439	peroxisomal part	C	Q91VS7,Q8C0I1,Q7TNT2	P41216,P24270,P49817,Q9CQ92,P61028,Q8VCI5,Q91VS7,P55096,Q9R0H0,Q99LB2,Q9R0A0,Q9JJW0,Q8VCF0,Q99MZ7,Q61285,P48410,O09012,O70579,Q9QXY9,Q5XG73,P98192,Q9QUJ7,Q9CZW4,P99029,P63038,P35700,Q921H8,Q9JHR7,P51660,P32020,Q99JF5,Q9WUR2,Q9EPL9,P58137,Q8C0L6,Q8C0I1,Q99J39,Q6P6M5,Q7TNT2,Q922J9	0.038612	0.075
GO:0010883	regulation of lipid storage	P	P11589,Q8BGW1	P01027,E9Q4Z2,Q08857,Q9WVK4,P30204,P11152,Q61009,Q8BYY4,P11589,P43406,P14847,Q06180,O54890,Q91V79,Q8CI95,B9EJ86,Q8BGW1	0.0396646	0.117647
GO:0051539	4 iron, 4 sulfur cluster binding	F	Q9D7P6,Q5RKZ7	Q91VD9,Q99KI0,Q91YT0,Q9CQA3,Q8K3J1,Q921G7,P28271,Q91WD5,Q9DC70,Q8WTY4,Q9D7P6,Q9QZ23,Q5RKZ7,Q8CHR6,P52431,P33609,Q61493	0.0396646	0.117647
GO:0046914	transition metal ion binding	F	P12791,P36423,O55042,Q9D7P6,Q8BGW1,Q8VEE1,Q9D2N4,P97500,Q2VIS4,P97347	P09528,P29391,P14211,P01942,Q91WS0,Q99KI0,P08071,Q3TYQ9,Q5MPP0,Q8K0C4,Q00519,Q9CX80,Q924Y0,P61222,P55249,P11672,Q9DCM0,Q99JT9,Q60715,P33267,P13516,P46656,Q8BKE6,P22315,P12791,Q60716,Q91ZE0,Q6T707,P39654,Q3V1T4,Q9R0E1,Q64462,P12790,Q05421,P36423,Q8BLR9,Q9CRA4,Q99LN9,Q9QZ23,P48999,G3X982,Q60991,Q8CG70,P00184,Q64429,Q8CHR6,Q99N16,P27786,Q9EP75,Q9QZ82,Q9DBG1,Q4JK59,Q99LX0,P08228,P97352,P50247,P06728,…	0.0429105	0.0347222
GO:0033559	unsaturated fatty acid metabolic process	P	P36423,Q8BHI7,P12791	Q9R0Q7,P34884,Q9JM51,P04441,Q9DB60,P22437,Q9JHF7,Q8BWM0,P36423,Q50L41,P13516,Q9JLJ5,Q9EQC4,Q6T707,Q9D2Y9,Q8BHI7,Q8K023,P27612,Q9R0H0,Q8VDQ1,Q62011,P13745,O35678,Q63844,P55249,P39654,Q91WC9,Q64429,P47713,Q99N16,Q9EP75,P33267,P12791,P12790,Q05421,Q05816,P10107,Q9WTU6,P34914,Q9Z1Q2,Q61285,P48410	0.0436846	0.0714286
GO:1905330	regulation of morphogenesis of an epithelium	P	P42225,P09803	Q02248,P42225,P63001,Q9D1D6,P51141,P16056,P09803,O35129,P51637,P26618,Q8BKG3,O70421,P11859,Q9QYH6,Q8BGV3,Q80TV8,Q9JLN9,Q9QXH4	0.0440864	0.111111
GO:1901890	positive regulation of cell junction assembly	P	Q8BLX7,O88551	P18760,Q9JKF1,P63001,P08207,P01831,Q99JW4,Q9ESB3,O35988,P70335,Q8CGA0,O70624,P97333,P97820,Q8BLX7,O88551,P49817,P11859,O08917	0.0440864	0.111111
GO:0015108	chloride transmembrane transporter activity	F	Q9QX15,O35054	Q9QX15,Q8BH79,Q6P9J9,P86044,Q75UR0,Q9WVD4,Q9Z1Q5,Q9QYB1,Q9D7P7,O35054,Q99LI2,Q8BHJ7,P55012,Q9CQF9,Q924N4,Q99MR3,Q9WVL3,P04919	0.0440864	0.111111
GO:0004857	enzyme inhibitor activity	F	P35175,Q9D695,P35173,P56567,P14602,O55042	P34928,Q61937,Q8BML9,P61022,Q91YW3,Q99M51,Q99LH9,P70677,Q60772,Q8R409,Q3TVI4,P12367,Q9DBC7,P31324,P60840,Q99LM3,P56212,Q9DCL8,P63089,Q6R891,Q9JK37,Q8R4S0,Q8R3G1,Q62426,P35175,P01027,Q00896,P22599,Q9JMA1,P21460,Q00897,Q61838,Q9WUP7,P28666,P28665,P01029,P06684,P97430,P70124,Q60854,Q9D154,P70296,P07759,P19324,P32261,Q91WP6,P97298,Q03734,P12388,Q5I2A0,Q9D7P9,O08800,Q8K1K6,Q61704,Q9ESB3,A6X935,Q61247,…	0.0460189	0.0431655
GO:0018394	peptidyl-lysine acetylation	P	Q7TQA3,O55042,Q9D0S9	Q9WTM5,P60122,Q9Z2D8,Q6PGB6,Q9Z2D6,P25916,Q9D1P2,B2RWS6,P37040,Q9Z1R2,Q9JHD2,Q61164,Q63844,Q3U108,Q9Z0J4,Q7TQA3,O88712,O55042,Q9JKP7,Q3TKT4,P61965,Q6IE82,Q99PP9,B2RRD7,P97929,Q9Z2N8,Q80W54,Q9JIA7,Q8CGY8,Q61191,P97765,Q8C1D8,Q9Z0H3,Q60520,O35280,P97471,Q9D906,Q99J83,O09106,P70288,Q9D0S9,Q5EG47,O55102	0.0463399	0.0697674
GO:0099512	supramolecular fiber	C	Q61555,P14602,Q80YT7,Q61414,Q61765,Q80XI6,Q7TMK6,P46660,Q6IFZ6,A2AQP0,Q5SX40,O70548,O55042	Q61554,Q9QZJ6,Q9D1H9,C0HKD8,P55002,Q61555,P05977,P31001,P14602,P31786,Q9QXS1,P23927,P21460,P13541,P51667,Q9DC77,Q7TNV0,Q99LM3,P19123,Q9DBR7,P23242,Q08879,P58771,P63260,Q5SX39,P13542,Q9QUM9,O08638,A2ASS6,Q9JHJ0,Q91YR1,Q9Z0P5,Q91Z83,O09165,Q02566,P49813,Q9JLH8,Q9WV06,Q8BVA4,Q9JKK7,Q8BL65,Q80XB4,Q3UHZ5,Q80YT7,Q08481,Q9R0Y5,P54823,P49935,Q61781,Q9Z2K1,Q9QWL7,P20152,Q61414,P63017,Q02257,Q922U2,Q01768,…	0.0478592	0.0311005
GO:1903845	negative regulation of cellular response to transforming growth factor beta stimulus	P	Q9QUR7,Q61555	P20029,Q99MQ4,Q9Z1Z2,P49817,Q6P8X1,P39054,Q9WUD1,Q61543,Q9QUR7,Q9WV80,P49443,Q8R422,O88939,Q9Z0F8,Q62219,Q99K41,O88393,Q61554,Q61555	0.0486819	0.105263
GO:0010676	positive regulation of cellular carbohydrate metabolic process	P	P11589,O55042	P11589,Q8BH59,O70362,P05480,Q60823,Q3U1J4,P56212,Q6P2K6,Q06180,Q9ERU9,P70265,P61965,Q9JHD2,Q62417,Q8VEH5,P63158,O55042,Q8BZA9,O88990	0.0486819	0.105263
GO:0030512	negative regulation of transforming growth factor beta receptor signaling pathway	P	Q61555,Q9QUR7	Q61554,Q61555,P20029,Q99MQ4,Q9Z1Z2,P49817,Q6P8X1,P39054,Q9WUD1,Q61543,Q9QUR7,Q9WV80,P49443,Q8R422,O88939,Q9Z0F8,Q62219,Q99K41,O88393	0.0486819	0.105263
GO:0099524	postsynaptic cytosol	C	Q9QUR7,P11798	P63017,O88569,Q91VC3,P05063,Q9QYJ3,P63073,Q9QUR7,P46935,P11798,Q8BKX1,Q60876,Q62165,Q9QXS6,P28867,P51432,P35922,Q9Z2Y3,Q9JLN9,P42859	0.0486819	0.105263
GO:0031225	anchored component of membrane	C	O88935,P57096,Q8VEN2	Q61147,P01831,P18181,Q9QZF2,P51150,P61027,P46638,Q9CQD1,P35278,P53994,Q91V41,Q6PHN9,P61021,Q91ZR1,P60904,P63011,P56371,Q99P58,O88935,Q9QUG3,P10810,O08532,P28667,P51655,Q60634,P0CW02,Q9Z1Q4,P57096,P35459,P31428,Q9WTR5,Q91YK8,P04925,Q8R2G4,Q61503,Q8R2Q8,Q8R422,Q9D7Z7,P13595,Q8VEN2,P58242,Q9Z0K8,B1AVD1,Q61475	0.0490736	0.0681818
GO:0099080	supramolecular complex	C	O55042,Q61555,P14602,Q61414,Q61765,Q80XI6,Q7TMK6,Q80YT7,P46660,Q6IFZ6,A2AQP0,Q5SX40,O70548	O55042,Q61554,Q9QZJ6,Q9D1H9,C0HKD8,P55002,Q61555,P05977,P31001,P14602,P31786,Q9QXS1,P23927,P21460,P13541,P51667,Q9DC77,Q7TNV0,Q99LM3,P19123,Q9DBR7,P23242,Q08879,Q9R0Y5,P54823,P49935,Q61781,Q9Z2K1,Q9QWL7,P20152,Q61414,P63017,Q02257,Q922U2,Q01768,P15532,P15331,Q6IFX2,P08551,O55135,Q0VBK2,P08553,Q8VCW2,Q70IV5,Q99PS0,Q9Z320,P19246,Q99104,P28293,P05784,P03995,Q61765,Q9EPM5,A1L317,Q62168,Q8CCX5,B1AQ75,…	0.049411	0.0309524
GO:0099081	supramolecular polymer	C	O55042,Q61555,P14602,Q80YT7,A2AQP0,Q61414,Q61765,Q80XI6,Q7TMK6,P46660,Q6IFZ6,Q5SX40,O70548	O55042,Q61554,Q9QZJ6,Q9D1H9,C0HKD8,P55002,Q61555,P05977,P31001,P14602,P31786,Q9QXS1,P23927,P21460,P13541,P51667,Q9DC77,Q7TNV0,Q99LM3,P19123,Q9DBR7,P23242,Q08879,P58771,P63260,Q5SX39,P13542,Q9QUM9,O08638,A2ASS6,Q9JHJ0,Q91YR1,Q9Z0P5,Q91Z83,O09165,Q02566,P49813,Q9JLH8,Q9WV06,Q8BVA4,Q9JKK7,Q8BL65,Q80XB4,Q3UHZ5,Q80YT7,Q08481,A2AQP0,Q9R0Y5,P54823,P49935,Q61781,Q9Z2K1,Q9QWL7,P20152,Q61414,P63017,Q02257,…	0.049411	0.0309524
GO:0045111	intermediate filament cytoskeleton	C	Q61414,Q61765,P46660,Q6IFZ6	Q61781,Q9Z2K1,Q9QWL7,P20152,Q61414,P63017,Q02257,Q922U2,Q01768,P15532,P15331,Q6IFX2,P08551,O55135,Q0VBK2,P08553,Q8VCW2,Q70IV5,Q99PS0,Q9Z320,P19246,Q99104,P28293,P05784,P03995,Q61765,Q9EPM5,P23242,A1L317,Q62168,Q8CCX5,B1AQ75,Q91ZU6,Q6P5H2,Q9ERR1,P46660,P31001,P48678,P14733,P21619,P11531,P97333,Q8VED5,Q6IFZ6,P04104,Q9Z331,P50446,P02535,O89094,Q8R0W0,Q8BK63,P08730,Q3TTY5,Q9R0H5,Q148V8,Q9ERE2,P07744,…	0.0498321	0.0540541

## Sheet: NF vs NC
GO_ID	Term	Category	TestSeqs	RefSeqs	P value	richFactor
GO:0034987	immunoglobulin receptor binding	F	P01837,P06330,P18527,P01820,P03987	Q8BTM8,P16110,P14234,P01837,P01863,P06330,P01867,P18528,P18527,P01592,P18524,P01872,P01878,P01806,P18525,P01796,P01820,P01786,P01868,P03987,P01795,P06327,P01821,P18531,P01759	2.06235e-06	0.2
GO:0019814	immunoglobulin complex	C	P01837,P06330,P18527,P01820,P01635	P01872,P01837,P01863,P06330,P01867,P18528,P18527,P18524,P01806,P18525,P01796,P01820,P01786,P01868,P01795,P06327,P01821,P18531,P01759,P01592,P01660,P01644,P01648,P01646,P01637,P01668,P01636,P01635,P01631,P01634,P04940,P01629,P01633,P01680,P01723,P84750	1.36087e-05	0.138889
GO:0042571	immunoglobulin complex, circulating	C	P01837,P06330,P18527,P01820	P01592,P01837,P01863,P06330,P01867,P18528,P18527,P18524,P01872,P01806,P18525,P01796,P01820,P01786,P01868,P01795,P06327,P01821,P18531,P01759	2.38794e-05	0.2
GO:0006910	phagocytosis, recognition	P	P01837,P06330,P18527,P01820	Q61009,P01837,P01863,P06330,P01867,P18528,P18527,P18524,P21956,P01872,Q08857,P01806,P18525,P01796,Q8CJ91,P01820,P01786,P01868,Q8K4Q8,P01795,P06327,P01821,P18531,P01759,P97797	6.03574e-05	0.16
GO:0050853	B cell receptor signaling pathway	P	P01837,P06330,P18527,P01820	P25911,P08101,P35329,P35762,Q9JM90,P68404,Q07813,P01837,P01863,P06330,P63085,P01867,P18528,P18527,P18524,P01872,P01806,P18525,P29351,P01796,P01820,P06800,P01786,P01868,P01795,P06327,P01821,P18531,P01759,Q8BUL6,Q6A0D4,P56528,P35991,Q8CIH5,Q8K1X4	0.000234144	0.114286
GO:0008037	cell recognition	P	P01837,P06330,P18527,P01820,Q8R555	P26041,P35762,Q811D0,Q68FF6,Q8C3J5,Q8C147,P01837,P01863,P06330,P01867,P18528,P18527,P18524,P21956,P01872,Q08857,P01806,P18525,P01796,Q8CJ91,P01820,P01786,P01868,Q8K4Q8,P01795,P06327,P01821,P18531,P01759,P97797,Q61009,P05064,P17879,P42932,Q60930,P80314,P80317,P80315,P80313,P11983,P80316,P80318,P16627,Q9QXC1,Q80X50,P50428,Q6UQ17,P70677,Q99P72,O08738,P13595,P97333,P11627,Q91YM2,Q8R555,P63101,P06837,…	0.000304679	0.0735294
GO:0002250	immune response	P	Q9WTK5,P01837,P06330,P18527,P01820,Q3U108,P01635	P01868,P01027,P01867,P20491,P35991,P08101,P00493,P97821,P23591,P49935,O88662,P48453,P06800,P63017,P01899,P01901,P23492,O70439,P01897,Q921M7,P04223,P14429,P01887,P01900,P36371,P11609,Q61160,Q9Z1M0,P43247,P52633,Q9JLN9,P14483,P01872,P63038,Q811D0,Q99JH8,P12804,P35762,Q5SUA5,Q9QXX0,P13597,Q6A0D4,Q9WTK5,Q9Z0F8,P70387,P03958,P28078,P28843,Q99N11,Q9D659,P18181,P39654,Q9EPB4,P34884,P04441,P15379,P63158,…	0.000320561	0.0463576
GO:0006958	complement activation, classical pathway	P	P01837,P06330,P18527,P01820	Q61475,P01837,P01027,P01863,P06330,P01867,P18528,P18527,P18524,P41317,P01872,P01806,P18525,P01796,O35658,Q61129,P01820,P01029,P01786,P01868,P98086,P12246,P97290,P14106,P01795,Q64735,P06684,P14847,P06327,P01821,P18531,P01759,Q8CG16,Q8CG14,P39039,P06683,Q8BH35,Q8K182	0.000323734	0.105263
GO:0002460	adaptive immune response	P	Q9WTK5,P01837,P06330,P18527,P01820,Q3U108	P01868,P01027,P01867,P20491,P35991,P08101,P00493,P97821,P23591,P49935,O88662,P48453,P06800,P63017,P01899,P01901,P23492,O70439,P01897,Q921M7,P04223,P14429,P01887,P01900,P36371,P11609,Q61160,Q9Z1M0,P43247,P52633,Q9JLN9,P14483,P01872,P63038,Q811D0,Q99JH8,P12804,P35762,Q5SUA5,Q9QXX0,P13597,Q6A0D4,Q9WTK5,Q9Z0F8,P70387,P03958,P28078,P28843,Q99N11,Q9D659,P63158,Q9EP73,P29351,Q91X72,P01837,P01863,P06330,…	0.00035793	0.0550459
GO:0050871	positive regulation of B cell activation	P	P01837,P06330,P18527,P01820	P01872,P34884,P03958,P04441,P06800,Q62351,P35762,P56528,P25916,Q8K1X4,P23492,P42232,Q9ES52,P53690,Q8BFV2,Q9QZW0,Q8BTW3,P70399,P52633,P43247,Q8BVE8,P01837,P01863,P06330,P01867,P18528,P18527,P18524,P01806,P18525,P01796,P01820,P01786,P01868,P01795,P06327,P01821,P18531,P01759	0.000358404	0.102564
GO:0003823	antigen binding	F	P01837,P06330,P18527,P01820	P01899,P01901,P14483,P01897,P04223,P14429,P14438,Q8VCH6,P01900,P11609,P63330,Q76MZ3,Q9D0E1,P20918,P97797,B2RWS6,P01837,P01863,P06330,P01867,P18528,P18527,P01592,P18524,P01872,P01806,P18525,P01796,P01631,P01820,P01786,P01868,P18181,P01629,P01795,P06327,P01821,P18531,P01759	0.000358404	0.102564
GO:0002455	humoral immune response	P	P01837,P06330,P18527,P01820	P06800,P29351,P08101,Q91X72,P01837,P01027,P01863,P06330,P01867,P18528,P18527,P18524,P41317,P01872,P01806,P18525,P01796,O35658,Q61129,P01820,P01029,P01786,P01868,P98086,P12246,P97290,P14106,P01795,Q64735,P06684,P14847,P06327,P01821,P18531,P01759,Q8CG16,Q8CG14,Q61475,P39039,P06683,Q8BH35,Q8K182,P14483,P35762	0.000572685	0.0909091
GO:0006956	complement activation	P	P01837,P06330,P18527,P01820	P04104,P41317,P39039,P97290,P01027,P03953,P06909,P04186,P06684,P11680,P06683,Q8BH35,Q8K182,P01837,P01863,P06330,P01867,P18528,P18527,P18524,P01872,P01806,P18525,P01796,O35658,Q61129,P01820,P01029,P01786,P01868,P98086,P12246,P14106,P01795,Q64735,P14847,P06327,P01821,P18531,P01759,Q8CG16,Q8CG14,Q61475,Q9QWK4,P67778	0.000624502	0.0888889
GO:0006911	phagocytosis, engulfment	P	P01837,P06330,P18527,P01820	P63001,P35441,O88597,P01027,Q921E2,Q08857,Q9JM90,Q8K3G9,Q6P9J9,Q61805,Q8K1X4,P39654,Q8VDD5,P60766,P01837,P01863,P06330,P11835,P13020,P01867,O70200,P18528,P18527,P18524,P21956,P01872,P01806,P20491,P18525,P01796,Q8BYW1,P01820,P01786,P01868,P08101,P01795,Q8BPU7,P05555,P55194,P06327,P30204,D3Z6Q9,P01821,P18531,P01759,P97797,Q8K2A1,P41233	0.000799892	0.0833333
GO:0009617	response to bacterium	P	P01837,P06330,P18527,P01820,O55042,Q9WTK5,Q3U108,P02798	P01887,P36371,P10810,Q91VE3,Q3UP87,Q9D2Q8,P62821,O35639,Q91V41,P01837,P01901,P01863,P06330,Q61646,P51437,P01867,P18528,P18527,P08905,P18524,P04223,P01872,P11247,P01806,P20491,P18525,P01796,Q91ZW8,P11672,P49290,Q09014,P01820,Q61878,P01786,Q9JI48,P01868,P28033,P60603,P01795,P06327,Q8VCF0,P28867,P01821,P18531,P01759,Q8R4Y4,B9EKI3,P23611,Q99NH0,O35516,A1L314,P50446,P30681,P41317,Q08857,Q9Z0E6,P62892,…	0.000806137	0.0347826
GO:0050864	regulation of B cell activation	P	P01837,P06330,P18527,P01820	P35329,P70677,P08101,O54885,P25911,Q925B0,Q9ES52,P35991,P01872,P34884,P03958,P04441,P06800,Q62351,P35762,P56528,P25916,Q8K1X4,Q62383,P29351,O54879,P23492,P42232,P53690,Q8BFV2,Q9QZW0,Q3ULW8,Q8BTW3,P70399,P52633,Q8R3N6,P43247,Q8BVE8,P01837,P01863,P06330,P01867,P18528,P18527,P18524,P01806,P18525,P01796,P01820,P01786,P01868,P01795,P06327,P01821,P18531,P01759	0.00100756	0.0784314
GO:0099024	plasma membrane invagination	P	P01837,P06330,P18527,P01820	Q8VDD5,P60766,P01837,P63001,P01863,P06330,P11835,P13020,P01867,O70200,P18528,P18527,P18524,P21956,P01872,P01806,P20491,P18525,P01796,Q8BYW1,P01820,P01786,P01868,P08101,P01795,Q8BPU7,P05555,P55194,P06327,P30204,D3Z6Q9,P01821,P18531,P01759,P97797,Q8K2A1,P41233,Q9QUI0,Q91VH2,Q91ZR2,P35441,O88597,P01027,Q921E2,Q08857,Q9JM90,Q8K3G9,Q6P9J9,Q61805,Q8K1X4,P39654	0.00100756	0.0784314
GO:2000756	regulation of peptidyl-lysine acetylation	P	Q3U108,O55042,Q9D0S9	Q61164,Q9WTM5,Q63844,Q3U108,Q9Z0J4,Q9JHD2,B2RWS6,Q7TQA3,O88712,O55042,P97765,Q80W54,Q8C1D8,Q9Z0H3,Q60520,O35280,Q9JIA7,P97471,Q9D906,Q99J83,O09106,P70288,Q9D0S9,Q5EG47	0.00116984	0.125
GO:0051707	response to other organism	P	P01837,P06330,P18527,P01820,P02798,O55042,Q9WTK5,Q8CAK3,Q3U108	Q64010,P11247,Q09014,Q3UP87,Q8CJ91,P49290,Q61878,Q9EPB4,P42225,Q9JLJ1,Q8VCF0,Q3TBT3,Q60953,Q6Q899,Q3UIR3,Q8CAS9,Q60520,P01887,P36371,P10810,Q91VE3,Q9D2Q8,P62821,O35639,Q91V41,P01837,P01901,P01863,P06330,Q61646,P51437,P01867,P18528,P18527,P08905,P18524,P04223,P01872,P01806,P20491,P18525,P01796,Q91ZW8,P11672,P01820,P01786,Q9JI48,P01868,P28033,P60603,P01795,P06327,P28867,P01821,P18531,P01759,Q8R4Y4,…	0.00125496	0.029316
GO:0043207	response to external biotic stimulus	P	P01837,P06330,P18527,P01820,P02798,O55042,Q9WTK5,Q8CAK3,Q3U108	Q64010,P11247,Q09014,Q3UP87,Q8CJ91,P49290,Q61878,Q9EPB4,P42225,Q9JLJ1,Q8VCF0,Q3TBT3,Q60953,Q6Q899,Q3UIR3,Q8CAS9,Q60520,P01887,P36371,P10810,Q91VE3,Q9D2Q8,P62821,O35639,Q91V41,P01837,P01901,P01863,P06330,Q61646,P51437,P01867,P18528,P18527,P08905,P18524,P04223,P01872,P01806,P20491,P18525,P01796,Q91ZW8,P11672,P01820,P01786,Q9JI48,P01868,P28033,P60603,P01795,P06327,P28867,P01821,P18531,P01759,Q8R4Y4,…	0.00125496	0.029316
GO:0045087	innate immune response	P	Q8CAK3,O55042,P01837,P06330,P18527,P01820,Q9QZH6,Q3U108	P04104,P41317,P39039,P97290,P63158,Q9EPB4,Q8VIJ6,Q99K48,Q8K310,Q8C2Q3,Q9R002,Q8R326,P0DOV2,Q8CGE8,Q8VCF0,P27641,Q8R409,Q3TBT3,P23475,Q60520,P97313,Q3UMW7,P18654,Q9EPQ1,Q6R5N8,P06728,P08071,P51437,P62892,P62862,P63038,Q9WUU8,Q91WK0,P01027,P03953,P06909,P04186,P06684,P11680,P06683,Q8BH35,Q8K182,P35700,P29351,Q08857,P58242,B2RRE7,P25911,Q61462,Q8K4Q8,O08573,Q6A0D4,Q8R317,P49817,O08917,E9Q4P1,Q9D2Q8,…	0.00128494	0.0323887
GO:0072376	protein activation cascade	P	P01837,P06330,P18527,P01820	P04104,P41317,P39039,P97290,P01027,Q7TMR0,Q80YC5,P06909,P04186,P01029,Q8K182,P03953,P06684,P11680,P06683,Q8BH35,P01837,P01863,P06330,P01867,P18528,P18527,P18524,P01872,P01806,P18525,P01796,O35658,Q61129,P01820,P01786,P01868,P98086,P12246,P14106,P01795,Q64735,P14847,P06327,P01821,P18531,P01759,Q8CG16,Q8CG14,Q61475,Q01339,Q9QWK4,P67778,E9PV24,Q8K0E8,Q8BH61,Q8VCM7,Q08879,P32261,Q9EQK5	0.00133999	0.0727273
GO:0010324	membrane invagination	P	P01837,P06330,P18527,P01820	Q8VDD5,P60766,P01837,P63001,P01863,P06330,P11835,P13020,P01867,O70200,P18528,P18527,P18524,P21956,P01872,P01806,P20491,P18525,P01796,Q8BYW1,P01820,P01786,P01868,P08101,P01795,Q8BPU7,P05555,P55194,P06327,P30204,D3Z6Q9,P01821,P18531,P01759,P97797,Q8K2A1,P41233,Q9QUI0,Q91VH2,Q91ZR2,P35441,O88597,P01027,Q921E2,Q08857,Q9JM90,Q8K3G9,Q6P9J9,Q61805,Q8K1X4,P39654,Q9DB34,O70492,Q99LI8,Q3UQN2	0.00133999	0.0727273
GO:0009607	response to biotic stimulus	P	P01837,P06330,P18527,P01820,P02798,O55042,Q9WTK5,Q8CAK3,Q3U108	Q64010,P11247,Q09014,Q3UP87,Q8CJ91,P49290,Q61878,Q9EPB4,P42225,Q9JLJ1,Q8VCF0,Q3TBT3,Q60953,Q6Q899,Q3UIR3,Q8CAS9,Q60520,P01887,P36371,P10810,Q91VF2,Q91VE3,Q9ESB3,P63158,P63038,Q9EP73,Q9D2Q8,P62821,O35639,Q91V41,P01837,P01901,P01863,P06330,Q61646,P51437,P01867,P18528,P18527,P08905,P18524,P04223,P01872,P01806,P20491,P18525,P01796,Q91ZW8,P11672,P01820,P01786,Q9JI48,P01868,P28033,P60603,P01795,P06327,…	0.00150495	0.0285714
GO:1901983	regulation of protein acetylation	P	Q3U108,O55042,Q9D0S9	Q61164,Q9WTM5,Q63844,Q3U108,Q9Z0J4,Q9JHD2,B2RWS6,Q7TQA3,O88712,O55042,P97765,Q80W54,Q8C1D8,Q9Z0H3,Q60520,Q99LX0,Q9WV60,Q5F2E8,O35280,Q9JIA7,P97471,Q9D906,Q99J83,O09106,P70288,Q9D0S9,Q5EG47	0.0016594	0.111111
GO:0050851	antigen receptor-mediated signaling pathway	P	P01837,P06330,P18527,P01820	P61089,P63085,P47941,Q61411,P08556,P01831,Q99JB2,P06800,P49769,Q99LC8,Q61749,Q8CHW4,Q6A0D4,P35991,Q8CIH5,P83741,Q62077,P70398,P62908,P03958,P35762,Q04207,P01837,P01863,P06330,P01867,P18528,P18527,P18524,P01872,P01806,P18525,P29351,P01796,P01820,P01786,P01868,P01795,P25911,P06327,P68404,P01821,P18531,P01759,Q8BUL6,P56528,Q8K1X4,P08101,P35329,Q9DAK9,P26040,P16110,Q9D7X3,P04925,Q99N11,Q925B0,Q06180,…	0.00174255	0.0677966
GO:0016064	immunoglobulin mediated immune response	P	P01837,P06330,P18527,P01820	P01868,P01027,P01867,P20491,P35991,P08101,P43247,P14483,P01872,P12804,P35762,P06800,P29351,Q91X72,P01837,P01863,P06330,P18528,P18527,P18524,P41317,P01806,P18525,P01796,O35658,Q61129,P01820,P01029,P01786,P98086,P12246,P97290,P14106,P01795,Q64735,P06684,P14847,P06327,P01821,P18531,P01759,Q8CG16,Q8CG14,Q61475,P39039,P06683,Q8BH35,Q8K182,Q8BTW3,Q6A028,Q62383,Q3ULW8,Q62351,P70399,P63038,P52633,Q8R3N6,…	0.00209485	0.0645161
GO:0019724	B cell mediated immunity	P	P01837,P06330,P18527,P01820	P01868,P01027,P01867,P20491,P35991,P08101,P43247,P14483,P01872,P63038,P12804,P35762,P06800,P29351,Q91X72,P01837,P01863,P06330,P18528,P18527,P18524,P41317,P01806,P18525,P01796,O35658,Q61129,P01820,P01029,P01786,P98086,P12246,P97290,P14106,P01795,Q64735,P06684,P14847,P06327,P01821,P18531,P01759,Q8CG16,Q8CG14,Q61475,P39039,P06683,Q8BH35,Q8K182,P04441,P28867,Q9ES52,P28078,Q8BTW3,Q6A028,Q62383,Q3ULW8,…	0.00222248	0.0634921
GO:0002449	lymphocyte mediated immunity	P	P01837,P06330,P18527,P01820,Q3U108	P01868,P01027,P01867,P20491,P35991,P08101,P00493,P97821,P23591,P49935,O88662,P48453,P06800,P63017,P01899,P01901,P23492,O70439,P01897,Q921M7,P04223,P14429,P01887,P01900,P36371,P11609,Q61160,Q9Z1M0,P43247,P14483,P01872,P63038,Q811D0,Q99JH8,P12804,P35762,Q5SUA5,Q9QXX0,P13597,Q6A0D4,P70387,P28843,Q99N11,Q9D659,P63158,P29351,Q91X72,P01837,P01863,P06330,P18528,P18527,P18524,P41317,P01806,P18525,P01796,…	0.00230607	0.0471698
GO:0051953	negative regulation of amine transport	P	O55042,Q9Z1W9	Q8R5J9,P22437,P25085,P0C605,P61922,P55772,O55042,Q9JIP7,Q9Z1W9	0.00268074	0.222222
GO:2000757	negative regulation of peptidyl-lysine acetylation	P	O55042,Q9D0S9	Q7TQA3,O88712,O55042,Q60520,Q9D906,Q99J83,O09106,P70288,Q9D0S9	0.00268074	0.222222
GO:0001775	cell activation	P	O55042,Q9WTK5,P01837,Q3TTY5,P06330,P18527,P01820,Q9R160	Q8VDD5,Q8C3J5,P26041,P35762,Q811D0,Q68FF6,Q8C147,P63158,Q9EPB4,O70200,Q99KQ4,Q06890,P98086,O55042,P29452,P05555,P12023,Q62120,Q9EPQ1,Q07813,P06800,P42232,Q69ZR2,P11609,Q91ZX7,P28798,P49769,Q9WTK5,O54885,Q99MN1,Q9ESD7,Q61805,Q7TNB8,P20491,Q61233,P13597,P12804,P24063,Q62178,P52633,Q9JLN9,P62754,P03958,O35516,A2AF47,Q8BZN6,Q8CIH5,P16045,Q62192,P97313,E9Q1P8,Q9QZW0,P14483,P01872,P35991,O08734,Q9QUI0,…	0.00272756	0.028777
GO:0002429	immune response-activating cell surface receptor signaling pathway	P	P01837,P06330,P18527,P01820	O70362,P20491,P25911,P61089,P63085,P47941,Q61411,P08556,P01831,Q99JB2,P06800,P49769,Q99LC8,Q61749,Q8CHW4,Q6A0D4,P35991,Q8CIH5,P83741,Q62077,P70398,P62908,P03958,P35762,Q04207,P08101,Q5SUA5,P01837,P01863,P06330,P01867,P18528,P18527,P18524,P01872,P01806,P18525,P29351,P01796,P01820,P01786,P01868,P01795,P06327,P68404,P01821,P18531,P01759,Q8BUL6,P56528,Q8K1X4,P35329,Q9DAK9,P26040,P16110,Q9D7X3,P04925,…	0.00294206	0.0588235
GO:0002768	immune response-regulating cell surface receptor signaling pathway	P	P01837,P06330,P18527,P01820	Q9Z1R2,O70362,P20491,P25911,P61089,P63085,P47941,Q61411,P08556,P01831,Q99JB2,P06800,P49769,Q99LC8,Q61749,Q8CHW4,Q6A0D4,P35991,Q8CIH5,P83741,Q62077,P70398,P62908,P03958,P35762,Q04207,P08101,Q5SUA5,P01837,P01863,P06330,P01867,P18528,P18527,P18524,P01872,P01806,P18525,P29351,P01796,P01820,P01786,P01868,P01795,P06327,P68404,P01821,P18531,P01759,Q8BUL6,P56528,Q8K1X4,P35329,Q9DAK9,P26040,P16110,Q9D7X3,…	0.00294206	0.0588235
GO:0071280	cellular response to copper ion	P	P02798,O55042	Q02013,P04925,P02802,P02798,Q91VR7,O55042,O88597,P12023,P00184,Q64430	0.00333201	0.2
GO:0002376	immune system process	P	O55042,Q30D77,P01635,Q9WTK5,Q8C138,P01837,P06330,P18527,P01820,Q9Z1W9,P56371,Q8CAK3,Q9QZH6,Q3U108	Q8VDD5,Q8C3J5,P26041,P35762,Q811D0,Q68FF6,Q8C147,P63158,Q9EPB4,O70200,Q99KQ4,Q06890,P98086,O55042,P29452,P05555,P12023,Q62120,Q9EPQ1,Q07813,O08734,P06800,P42232,Q69ZR2,P10107,Q922D8,Q9D8B7,P70677,P25911,O88351,O88522,P97484,Q8K1X4,A2AF47,Q8BZN6,P01868,P01027,P01867,P20491,P35991,P08101,P11609,P04104,P41317,P39039,P97290,P00493,P97821,P23591,P49935,O88662,P48453,P63017,P01899,P01901,P23492,O70439,…	0.00369589	0.0188934
GO:0006955	immune response	P	P01635,Q9WTK5,P01837,P06330,P18527,P01820,Q8CAK3,O55042,Q9QZH6,Q3U108	P01868,P01027,P01867,P20491,P35991,P08101,P04104,P41317,P39039,P97290,P00493,P97821,P23591,P49935,O88662,P48453,P06800,P63017,P01899,P01901,P23492,O70439,P01897,Q921M7,P04223,P14429,P01887,P01900,P36371,P11609,Q61160,Q9Z1M0,P43247,P63158,Q9EPB4,Q8VIJ6,Q99K48,Q8K310,Q8C2Q3,Q9R002,Q8R326,P0DOV2,Q8CGE8,Q8VCF0,P27641,Q8R409,Q3TBT3,P23475,Q60520,P97313,Q3UMW7,P18654,Q9EPQ1,Q6R5N8,P06728,P08071,P51437,…	0.00391968	0.0230947
GO:0006959	humoral immune response	P	P01837,P06330,P18527,P01820	P04104,P41317,P39039,P97290,P01027,P14483,P01867,P01872,P01868,P35762,Q91VE3,Q3UP87,P28078,P06800,P29351,P08101,Q91X72,P06909,P04186,P01029,Q8K182,P03953,P06684,P11680,P06683,Q8BH35,P01837,P01863,P06330,P18528,P18527,P18524,P01806,P18525,P01796,O35658,Q61129,P01820,P01786,P98086,P12246,P14106,P01795,Q64735,P14847,P06327,P01821,P18531,P01759,Q8CG16,Q8CG14,Q61475,P08071,P51437,P01592,P62892,P62862,…	0.00399901	0.0540541
GO:1901984	negative regulation of protein acetylation	P	O55042,Q9D0S9	Q7TQA3,O88712,O55042,Q60520,Q9D906,Q99J83,O09106,P70288,Q9D0S9,Q99LX0,Q9WV60	0.00404948	0.181818
GO:0009897	external side of plasma membrane	C	P01837,P06330,P18527,P01820,Q9R160	P10107,Q921I1,P08226,P20918,P50428,P01831,Q9QUG3,P10810,P48036,P09103,P14211,Q8K0E8,P01899,P01837,P10605,P01901,P01863,P06330,P16110,P14483,P01867,Q9JHR7,O08529,P01897,P18528,P0CW02,P18527,P18524,Q8VCM7,P04223,P21956,P06797,Q9Z1Q4,P01872,Q08857,P01806,P20491,Q64726,P97449,P18525,P19221,P09055,P01796,E9PV24,P03958,P14429,Q8VCT3,P47791,Q9WTR5,P13597,Q61739,Q8CJ91,P35441,O08917,Q64314,P14438,Q8VBZ3,…	0.00409858	0.0413223
GO:0042113	B cell activation	P	P01837,P06330,P18527,P01820	P03958,O35516,A2AF47,Q8BZN6,Q8CIH5,P16045,Q62192,P97313,E9Q1P8,Q9QZW0,P14483,P01872,P35991,Q07813,O08734,P01837,P06800,Q62393,Q06180,O88939,P26450,Q3KNJ2,Q9Z0F8,P43247,B2RWS6,Q9Z2V6,Q80TR8,P35329,P70677,P08101,O54885,P25911,Q925B0,Q9ES52,P34884,P04441,Q62351,P35762,P56528,P25916,Q8K1X4,P63038,P70698,P28867,Q8BTW3,Q6A028,Q62383,P29351,O54879,P23492,P42232,P53690,Q8BFV2,Q3ULW8,P70399,P52633,Q8R3N6,…	0.00528836	0.05
GO:0006952	defense response	P	O55042,P01837,P06330,P18527,P01820,P60202,Q8CAK3,Q9QZH6,Q3U108,Q9Z1W9	P25085,Q60932,P31786,Q60931,P63073,Q9Z2D6,Q6NZJ6,P28843,Q8BHJ7,E9Q4S1,O70200,Q99KQ4,Q06890,P98086,O55042,P29452,P05555,P12023,Q62120,Q9EPQ1,P01868,P01027,P01867,P20491,P35991,P08101,P04104,P41317,P39039,P97290,B2RWS6,P49290,Q61878,P63158,Q9EPB4,Q8VIJ6,Q99K48,Q8K310,Q8C2Q3,Q9R002,Q8R326,P0DOV2,Q8CGE8,Q8VCF0,P27641,Q8R409,Q3TBT3,P23475,Q60520,P97313,Q3UMW7,P18654,Q6R5N8,P06728,P08071,P51437,P62892,…	0.00550444	0.0220264
GO:0051251	positive regulation of lymphocyte activation	P	P01837,P06330,P18527,P01820	P01872,P34884,P03958,P04441,P06800,Q62351,P35762,P56528,P25916,Q8K1X4,P16045,P49817,P28843,Q9EP73,O54885,P42232,Q9Z0K8,P10107,P23492,O89053,P55264,O70200,Q99M51,P04919,P08032,Q9JLJ1,P11609,Q99M87,P24063,P62908,Q9EPB4,P47877,Q61160,Q61586,P11438,P22892,Q08024,Q9ES52,P53690,Q8BFV2,Q9QZW0,P14438,Q9D6Z6,P28078,P07901,Q9Z315,O08573,Q9D659,Q8BTW3,P70399,P14483,Q9QUI0,P52633,P43247,Q8BVE8,P63038,Q921M7,…	0.00602694	0.0481928
GO:0018394	peptidyl-lysine acetylation	P	Q3U108,O55042,Q9D0S9	Q9WTM5,P60122,Q9Z2D8,Q6PGB6,Q9Z2D6,P25916,Q9D1P2,B2RWS6,P37040,Q9Z1R2,Q9JHD2,Q61164,Q63844,Q3U108,Q9Z0J4,Q7TQA3,O88712,O55042,Q9JKP7,Q3TKT4,P61965,Q6IE82,Q99PP9,B2RRD7,P97929,Q9Z2N8,Q80W54,Q9JIA7,Q8CGY8,Q61191,P97765,Q8C1D8,Q9Z0H3,Q60520,O35280,P97471,Q9D906,Q99J83,O09106,P70288,Q9D0S9,Q5EG47,O55102	0.00634087	0.0697674
GO:0042742	defense response to bacterium	P	P01837,P06330,P18527,P01820	Q91VE3,Q3UP87,P50446,P30681,P51437,P08905,P41317,Q08857,Q9Z0E6,P62892,P62862,Q09014,P13516,Q921Z5,Q05117,P60603,P28293,Q61107,Q9D8T2,P70248,P39039,P14234,Q8R2U0,Q61805,Q9Z1M0,Q9Z0F8,Q8BV57,A1L314,Q9CZX8,P62889,Q9EPB4,P08071,P01872,Q9QZ85,P01592,P01868,P97430,Q8K0E8,E9PV24,P19221,Q8VDQ8,O08691,P28798,O08573,Q64008,Q61462,Q9D2Q8,P62821,O35639,Q91V41,P01837,P01901,P01863,P06330,Q61646,P01867,P18528,…	0.00655587	0.0470588
GO:0019894	kinesin binding	F	O55042,Q8CJ40	P60710,Q91W40,P70168,Q61595,Q8K2Q9,O55042,P22892,Q58A65,Q63850,Q811D0,P33175,Q91YD3,Q6ZPU9,Q8CJ40	0.0065874	0.142857
GO:0002443	leukocyte mediated immunity	P	P01837,P06330,P18527,P01820,Q3U108	P01868,P01027,P01867,P20491,P35991,P08101,P00493,P97821,P23591,P49935,O88662,P48453,P06800,P63017,P01899,P01901,P23492,O70439,P01897,Q921M7,P04223,P14429,P01887,P01900,P36371,P11609,Q61160,Q9Z1M0,P43247,P14483,P01872,P63038,Q811D0,Q99JH8,P12804,O88342,P09470,P70248,P35762,Q5SUA5,Q9QXX0,P13597,Q6A0D4,P63101,O09044,P25911,Q2TBE6,P70387,P28843,Q99N11,Q9D659,Q91VR5,Q9JIK5,Q8VCF0,Q6Q899,Q8R2Q8,P63158,…	0.00736494	0.0359712
GO:0098542	defense response to other organism	P	P01837,P06330,P18527,P01820,Q8CAK3	P49290,Q61878,Q9EPB4,P42225,Q9JLJ1,Q8VCF0,Q3TBT3,Q60953,Q6Q899,Q3UIR3,Q8CAS9,Q60520,Q91VE3,Q3UP87,Q9D2Q8,P62821,O35639,Q91V41,P01837,P01901,P01863,P06330,Q61646,P51437,P01867,P18528,P18527,P08905,P18524,P04223,P01872,P11247,P01806,P20491,P18525,P01796,Q91ZW8,P11672,Q09014,P01820,P01786,Q9JI48,P01868,P28033,P60603,P01795,P06327,P28867,P01821,P18531,P01759,Q8R4Y4,B9EKI3,P23611,Q99NH0,O35516,A1L314,…	0.00828441	0.034965
GO:0002694	regulation of leukocyte activation	P	O55042,P01837,P06330,P18527,P01820	P35329,P70677,P08101,O54885,P25911,Q925B0,Q9ES52,P35991,P01872,P34884,P03958,P04441,P06800,Q62351,P35762,P56528,P25916,Q8K1X4,P16045,P49817,P28843,Q9EP73,O08573,P42232,Q18PI6,Q9JIA7,Q8VBZ3,Q9JKV1,P11609,P70424,Q9Z0K8,P10107,P23492,O89053,P55264,O70200,Q99M51,P04919,P08032,Q9JLJ1,Q99M87,P24063,P62908,Q9EPB4,P47877,Q61160,Q61586,Q02248,Q05144,P16110,P14483,P29351,P14438,O35988,P28033,Q811D0,Q99P91,…	0.00852625	0.0347222
GO:2001024	negative regulation of response to drug	P	O55042,Q9Z1W9	Q8R5J9,P55772,P61922,P35235,O55042,Q9QUH0,Q3TRM8,P16056,Q99LX0,P10639,Q61207,Q9D1X0,P68040,Q61699,Q9CQN1,Q9Z1W9	0.00858919	0.125
GO:0032227	negative regulation of synaptic transmission, dopaminergic	P	O55042	O55042	0.00890328	1
GO:2000556	positive regulation of T-helper 1 cell cytokine production	P	Q3U108	Q3U108	0.00890328	1
GO:0051585	negative regulation of dopamine uptake involved in synaptic transmission	P	O55042	O55042	0.00890328	1
GO:0032053	ciliary basal body organization	P	Q8CJ40	Q8CJ40	0.00890328	1
GO:1905408	negative regulation of creatine transmembrane transporter activity	P	Q9Z1W9	Q9Z1W9	0.00890328	1
GO:0034474	U2 snRNA 3'-end processing	P	Q6P4S8	Q6P4S8	0.00890328	1
GO:2000316	regulation of T-helper 17 type immune response	P	Q3U108	Q3U108	0.00890328	1
GO:0032545	CURI complex	C	Q9D1C9	Q9D1C9	0.00890328	1
GO:0033256	I-kappaB/NF-kappaB complex	C	Q9WTK5	Q9WTK5	0.00890328	1
GO:0036017	response to erythropoietin	P	P02798	P02798	0.00890328	1
GO:0002266	follicular dendritic cell activation	P	Q9WTK5	Q9WTK5	0.00890328	1
GO:0036276	response to antidepressant	P	O55042	O55042	0.00890328	1
GO:0051945	negative regulation of catecholamine uptake involved in synaptic transmission	P	O55042	O55042	0.00890328	1
GO:0002268	follicular dendritic cell differentiation	P	Q9WTK5	Q9WTK5	0.00890328	1
GO:0051584	regulation of dopamine uptake involved in synaptic transmission	P	O55042	O55042	0.00890328	1
GO:0060468	prevention of polyspermy	P	Q9R160	Q9R160	0.00890328	1
GO:0036018	cellular response to erythropoietin	P	P02798	P02798	0.00890328	1
GO:1903282	regulation of glutathione peroxidase activity	P	O55042	O55042	0.00890328	1
GO:0033257	Bcl3/NF-kappaB2 complex	C	Q9WTK5	Q9WTK5	0.00890328	1
GO:1903566	positive regulation of protein localization to cilium	P	Q8CJ40	Q8CJ40	0.00890328	1
GO:1903284	positive regulation of glutathione peroxidase activity	P	O55042	O55042	0.00890328	1
GO:0061798	GTP 3',8'-cyclase activity	F	Q5RKZ7	Q5RKZ7	0.00890328	1
GO:2000470	positive regulation of peroxidase activity	P	O55042	O55042	0.00890328	1
GO:0034342	response to type III interferon	P	Q8CAK3	Q8CAK3	0.00890328	1
GO:0051940	regulation of catecholamine uptake involved in synaptic transmission	P	O55042	O55042	0.00890328	1
GO:0035744	T-helper 1 cell cytokine production	P	Q3U108	Q3U108	0.00890328	1
GO:1902715	positive regulation of interferon-gamma secretion	P	Q3U108	Q3U108	0.00890328	1
GO:0061799	cyclic pyranopterin monophosphate synthesis	F	Q5RKZ7	Q5RKZ7	0.00890328	1
GO:0003332	negative regulation of extracellular matrix constituent secretion	P	Q8C138	Q8C138	0.00890328	1
GO:2000318	positive regulation of T-helper 17 type immune response	P	Q3U108	Q3U108	0.00890328	1
GO:1905078	positive regulation of interleukin-17 secretion	P	Q3U108	Q3U108	0.00890328	1
GO:1905407	regulation of creatine transmembrane transporter activity	P	Q9Z1W9	Q9Z1W9	0.00890328	1
GO:0032980	keratinocyte activation	P	Q3TTY5	Q3TTY5	0.00890328	1
GO:0051622	negative regulation of norepinephrine uptake	P	O55042	O55042	0.00890328	1
GO:1903285	positive regulation of hydrogen peroxide catabolic process	P	O55042	O55042	0.00890328	1
GO:1904307	response to desipramine	P	O55042	O55042	0.00890328	1
GO:0034456	UTP-C complex	C	Q9D1C9	Q9D1C9	0.00890328	1
GO:2000554	regulation of T-helper 1 cell cytokine production	P	Q3U108	Q3U108	0.00890328	1
GO:0060732	positive regulation of inositol phosphate biosynthetic process	P	O55042	O55042	0.00890328	1
GO:1903564	regulation of protein localization to cilium	P	Q8CJ40	Q8CJ40	0.00890328	1
GO:0051955	regulation of amino acid transport	P	O55042,Q9Z1W9	P42208,Q8R5J9,Q9JKW0,P49769,O08691,Q61176,O55042,O08553,Q9Z1M0,P25085,P0C605,P61922,Q9JIP7,Q80UJ7,O08599,P11859,Q9Z1W9	0.00967968	0.117647
GO:0046688	response to copper ion	P	P02798,O55042	Q99LX0,P02802,P02798,Q64430,Q02013,P04925,Q91VR7,O55042,O88597,P12023,P00184,P08228,O09164,Q61147,Q64442,P16301,P00158	0.00967968	0.117647
GO:0001533	cornified envelope	C	Q8CGN8,Q3TTY5	Q62266,Q62267,P10107,P56567,P04104,E9Q557,Q8VHD8,P11088,Q2VIS4,P48997,Q08189,Q9D952,Q8CGN8,P97347,Q3TTY5,O70556,P18165,Q8BG67	0.0108284	0.111111
GO:0006473	protein acetylation	P	Q3U108,O55042,Q9D0S9	Q80UM3,Q6PGB6,Q9QY36,Q6PHQ8,P08249,Q9Z2V4,B2RWS6,Q9WTM5,P60122,Q9Z2D8,Q9Z2D6,P25916,Q9D1P2,Q8BWZ3,P37040,Q9Z1R2,Q9JHD2,O55102,Q61164,Q63844,Q3U108,Q9Z0J4,Q7TQA3,O88712,O55042,Q9JKP7,Q3TKT4,P61965,Q6IE82,Q99PP9,B2RRD7,P97929,Q9Z2N8,Q80W54,Q9JIA7,Q8CGY8,Q61191,P97765,Q8C1D8,Q9Z0H3,Q60520,Q99LX0,Q9WV60,Q5F2E8,O35280,P97471,Q9D906,Q99J83,O09106,P70288,Q9D0S9,Q5EG47,P62915	0.0113164	0.0566038
GO:0002696	positive regulation of leukocyte activation	P	P01837,P06330,P18527,P01820	P01872,P34884,P03958,P04441,P06800,Q62351,P35762,P56528,P25916,Q8K1X4,P16045,P49817,P28843,Q9EP73,O54885,P42232,Q9JIA7,Q9Z0K8,P10107,P23492,O89053,P55264,O70200,Q99M51,P04919,P08032,Q9JLJ1,P11609,Q99M87,P24063,P62908,Q9EPB4,P47877,Q61160,Q61586,P63038,Q99MN1,P35441,O08573,P53566,Q61805,P20491,Q64324,O08599,P14234,P70452,P11835,P05555,P11438,P22892,Q08024,Q9ES52,P53690,Q8BFV2,Q9QZW0,P14438,Q9D6Z6,…	0.0115293	0.04
GO:0018149	peptide cross-linking	P	Q8CGN8,Q3TTY5	P21981,P28654,P28653,Q62266,Q62267,P10107,P04104,E9Q557,Q8BH61,Q08189,Q9D952,Q8CGN8,Q3TTY5,Q9JLF6,P08121,P11276,P35441,O70556,P49222	0.0120344	0.105263
GO:0002757	immune response-activating signal transduction	P	P01837,P06330,P18527,P01820	Q3UMW7,P18654,Q9EPQ1,Q6R5N8,Q9Z1R2,O70362,P20491,P25911,P63038,Q9WUU8,Q91WK0,P61089,P63085,P47941,Q61411,P08556,P01831,Q99JB2,P06800,P49769,Q99LC8,Q61749,Q8CHW4,Q6A0D4,P35991,Q8CIH5,P83741,Q62077,P70398,P62908,P03958,P35762,Q04207,Q08857,P58242,B2RRE7,P63158,Q61462,Q8K4Q8,O08573,Q8R317,P49817,O08917,E9Q4P1,Q9D2Q8,P10810,P62331,Q8K3H0,Q8K3G9,P08071,Q61805,Q99P72,Q6SJQ5,P70671,P08101,Q5SUA5,Q3TBT3,…	0.0131769	0.0384615
GO:0031424	keratinization	P	Q8CGN8,Q3TTY5	O89094,Q9D709,Q62266,Q9Z2K1,Q9QWL7,O70456,Q62267,Q9Z331,P50446,Q9R269,Q8VHD8,P48997,Q08189,Q9D952,Q8CGN8,Q3TTY5,Q9JLF6,O70556,P18165,P10287	0.0132965	0.1
GO:0035065	regulation of histone acetylation	P	Q3U108,O55042	Q9WTM5,Q63844,Q3U108,Q9Z0J4,Q9JHD2,B2RWS6,Q7TQA3,O88712,O55042,P97765,Q80W54,Q8C1D8,Q9Z0H3,Q60520,O35280,Q9JIA7,P97471,Q9D906,Q99J83,Q61164	0.0132965	0.1
GO:0002764	immune response-regulating signaling pathway	P	P01837,P06330,P18527,P01820	Q3UMW7,P18654,Q9EPQ1,Q6R5N8,Q9Z1R2,O70362,P20491,P25911,P63038,Q9WUU8,Q91WK0,P61089,P63085,P47941,Q61411,P08556,P01831,Q99JB2,P06800,P49769,Q99LC8,Q61749,Q8CHW4,Q6A0D4,P35991,Q8CIH5,P83741,Q62077,P70398,P62908,P03958,P35762,Q04207,Q08857,P58242,B2RRE7,P63158,Q61462,Q8K4Q8,O08573,Q8R317,P49817,O08917,E9Q4P1,Q9D2Q8,P10810,P62331,Q8K3H0,Q8K3G9,P08071,Q61805,Q99P72,Q6SJQ5,P70671,P08101,Q5SUA5,Q3TBT3,…	0.0136111	0.0380952
GO:0050867	positive regulation of cell activation	P	P01837,P06330,P18527,P01820	Q9JHK5,Q62011,P01872,P34884,P03958,P04441,P06800,Q62351,P35762,P56528,P25916,Q8K1X4,P16045,P49817,P28843,Q9EP73,O54885,P42232,Q9JIA7,Q9Z0K8,P10107,P23492,O89053,P55264,O70200,Q99M51,P04919,P08032,Q9JLJ1,P11609,Q99M87,P24063,P62908,Q9EPB4,P47877,Q61160,Q61586,P63038,Q99MN1,P35441,O08573,P53566,Q61805,P20491,Q64324,O08599,P14234,P70452,P11835,P05555,P11438,P22892,Q08024,Q9ES52,P53690,Q8BFV2,Q9QZW0,…	0.0136111	0.0380952
GO:0050865	regulation of cell activation	P	O55042,P01837,P06330,P18527,P01820	P20491,Q9ESB3,P08226,P26618,O08742,Q9JHK5,Q62011,P35329,P70677,P08101,O54885,P25911,Q925B0,Q9ES52,P35991,P01872,P34884,P03958,P04441,P06800,Q62351,P35762,P56528,P25916,Q8K1X4,P16045,P49817,P28843,Q9EP73,O08573,P42232,Q18PI6,Q9JIA7,Q8VBZ3,Q9JKV1,P11609,P70424,Q9Z0K8,P10107,P23492,O89053,P55264,O70200,Q99M51,P04919,P08032,Q9JLJ1,Q99M87,P24063,P62908,Q9EPB4,P47877,Q61160,Q61586,Q02248,Q05144,P16110,…	0.0144524	0.0304878
GO:1904715	negative regulation of chaperone-mediated autophagy	P	O55042	P16675,O55042	0.0177291	0.5
GO:1990913	sperm head plasma membrane	C	Q9R160	P11499,Q9R160	0.0177291	0.5
GO:0038146	chemokine (C-X-C motif) ligand 12 signaling pathway	P	Q9Z1W9	Q6P9R2,Q9Z1W9	0.0177291	0.5
GO:0051621	regulation of norepinephrine uptake	P	O55042	O55042,P60710	0.0177291	0.5
GO:0032740	positive regulation of interleukin-17 production	P	Q3U108	Q3U108,Q01965	0.0177291	0.5
GO:0090188	negative regulation of pancreatic juice secretion	P	Q9Z1W9	Q9Z1W9,P83741	0.0177291	0.5
GO:0050816	phosphothreonine residue binding	F	Q9QUR7	Q9QUR7,P46935	0.0177291	0.5
GO:0019008	molybdopterin synthase complex	C	Q5RKZ7	Q9Z224,Q5RKZ7	0.0177291	0.5
GO:0031092	platelet alpha granule membrane	C	O55042	P07214,O55042	0.0177291	0.5
GO:0090494	dopamine uptake	P	O55042	Q99LX0,O55042	0.0177291	0.5
GO:2000295	regulation of hydrogen peroxide catabolic process	P	O55042	O55042,Q61646	0.0177291	0.5
GO:2000468	regulation of peroxidase activity	P	O55042	O55042,P19157	0.0177291	0.5
GO:0060467	negative regulation of fertilization	P	Q9R160	Q9R160,Q62010	0.0177291	0.5
GO:0051620	norepinephrine uptake	P	O55042	P60710,O55042	0.0177291	0.5
GO:0036438	maintenance of lens transparency	P	Q9Z1W9	Q9D8B3,Q9Z1W9	0.0177291	0.5
GO:0051583	dopamine uptake involved in synaptic transmission	P	O55042	O55042,Q99LX0	0.0177291	0.5
GO:0051934	catecholamine uptake involved in synaptic transmission	P	O55042	Q99LX0,O55042	0.0177291	0.5
GO:0010726	positive regulation of hydrogen peroxide metabolic process	P	O55042	P00405,O55042	0.0177291	0.5
GO:0043543	protein acylation	P	Q3U108,O55042,Q9D0S9	Q9QY36,P62915,B2RWS6,Q80UM3,Q6PGB6,Q6PHQ8,P08249,Q9Z2V4,P49443,P36993,O70310,Q9WTM5,P60122,Q9Z2D8,Q9Z2D6,P25916,Q9D1P2,Q8BWZ3,Q91W53,P15105,Q9JLJ1,P37040,Q9Z1R2,Q9JHD2,O55102,Q61164,Q63844,Q3U108,Q9Z0J4,Q7TQA3,O88712,O55042,Q9JKP7,Q3TKT4,P61965,Q6IE82,Q99PP9,B2RRD7,P97929,Q9Z2N8,Q80W54,Q9JIA7,Q8CGY8,Q61191,Q9D1G3,P97765,Q8C1D8,Q9Z0H3,O08749,Q60597,Q9D2G2,Q60520,Q99LX0,Q9WV60,Q5F2E8,O35280,P97471,…	0.0180389	0.047619
GO:0002252	immune effector process	P	P01837,P06330,P18527,P01820,Q8CAK3,Q3U108	P01868,P01027,P01867,P20491,P35991,P08101,P04104,P41317,P39039,P97290,P00493,P97821,P23591,P49935,O88662,P48453,P06800,P63017,P01899,P01901,P23492,O70439,P01897,Q921M7,P04223,P14429,P01887,P01900,P36371,P11609,Q61160,Q9Z1M0,P43247,Q9EPB4,P42225,Q9JLJ1,Q8VCF0,Q3TBT3,Q60953,Q6Q899,Q3UIR3,Q8CAS9,Q60520,Q91ZX7,P28798,P49769,P12023,Q99MN1,Q8C3J5,Q9ESD7,P63158,O54885,Q61805,Q7TNB8,Q61233,P13597,P12804,…	0.0195181	0.0246914
GO:0006909	phagocytosis	P	P01837,P06330,P18527,P01820	O89053,Q9R0M3,Q9Z1M0,P01837,P01863,P06330,P01867,P18528,P18527,P18524,P21956,P01872,Q08857,P01806,P18525,P01796,Q8CJ91,P01820,P01786,P01868,Q8K4Q8,P01795,P06327,P01821,P18531,P01759,P97797,Q61009,Q8VDD5,P60766,P63001,P11835,P13020,O70200,P20491,Q8BYW1,P08101,Q8BPU7,P05555,P55194,P30204,D3Z6Q9,Q8K2A1,P41233,Q61735,Q61805,Q5SUA5,P63158,P21981,Q91W90,Q91ZX7,P43406,O54885,P39654,O54890,P35441,O88597,…	0.0195472	0.034188
GO:0005198	structural molecule activity	F	Q9DC71,Q8CJ40,Q30D77,P60202,Q3TTY5,Q8CGN8,Q61765	Q9QZJ6,Q99K41,P62908,P99027,P62830,Q9CQR2,P35979,P63325,P62301,P62702,P25444,P51410,Q9CZX8,Q9Z1P6,P97351,P63323,P62984,P62983,P14131,P62267,P62270,P62889,P14869,Q8BP67,Q6ZWN5,P62281,O09167,P19253,O55142,Q9D823,P62751,P62082,P62245,P62852,P41105,P61358,Q6ZWV3,P62754,Q9JJI8,P14206,P62858,P62242,Q9D8E6,P14148,P62855,P62918,P97461,P47963,P63276,P27659,P47911,Q9D1R9,P62900,P53026,Q9CPR4,P62849,P62264,…	0.0202231	0.0221519
GO:0051952	regulation of amine transport	P	O55042,Q9Z1W9	P42208,Q8R5J9,Q9JKW0,P49769,P22437,O08691,Q61176,O55042,O08553,Q9Z1M0,P25085,P0C605,P61922,Q9Z0F7,P68404,P46096,Q9R0W9,P11859,P55772,Q99P72,Q9CXV1,Q9JIP7,Q80UJ7,O08599,Q9Z1W9	0.0204129	0.08
GO:2000401	regulation of lymphocyte migration	P	Q9Z1W9,Q8C138	Q6P9R2,O35598,Q9Z1W9,Q9Z0F8,P83741,Q925Q3,Q08642,Q8BI84,Q8C138,P47941,Q64010,Q61508,P51910,O54901,Q9EPB4,Q9QUI0,O70200,O08573,Q9JLJ1,P12023,O54890,Q8C147,Q61160,P26041,O55098	0.0204129	0.08
GO:0015837	amine transport	P	O55042,Q9Z1W9	P42208,Q8R5J9,Q9JKW0,P49769,P22437,O08691,Q61176,O55042,O08553,Q9Z1M0,P25085,P0C605,P61922,Q9Z0F7,P68404,P46096,Q9R0W9,P11859,P55772,Q99P72,Q9CXV1,Q9JIP7,Q80UJ7,O08599,Q9Z1W9	0.0204129	0.08
GO:0051249	regulation of lymphocyte activation	P	P01837,P06330,P18527,P01820	P35329,P70677,P08101,O54885,P25911,Q925B0,Q9ES52,P35991,P01872,P34884,P03958,P04441,P06800,Q62351,P35762,P56528,P25916,Q8K1X4,P16045,P49817,P28843,Q9EP73,O08573,P42232,Q8VBZ3,Q9JKV1,P11609,P70424,Q9Z0K8,P10107,P23492,O89053,P55264,O70200,Q99M51,P04919,P08032,Q9JLJ1,Q99M87,P24063,P62908,Q9EPB4,P47877,Q61160,Q61586,Q02248,Q05144,P16110,P14483,P29351,P14438,O35988,P28033,Q811D0,Q99P91,Q9WTX8,Q61176,…	0.0206706	0.0336134
GO:0000786	nucleosome	C	Q8CGP6,Q8CGP7	P84228,P68433,P62806,P43274,Q3TYA6,P10854,Q8CGP2,P02301,P43277,P15864,P43276,P43275,Q8CGP6,Q8CGP7,Q64523,Q8R1M2,P10922,Q9QZQ8,P27661,P0C0S6,Q3TEA8,Q8CCK0,Q64522,Q9JIA7,Q922P9,Q8CIG3	0.0219903	0.0769231
GO:0002682	regulation of immune system process	P	Q8C138,P01837,P06330,P18527,P01820,Q9Z1W9,O55042,Q3U108	P01027,P01867,P20491,P01868,P35991,P08101,P04104,P41317,P39039,P97290,P48453,P06800,P63017,P01899,P01901,P23492,O70439,P01897,Q921M7,P04223,P14429,P01887,P01900,P36371,P11609,Q61160,Q9Z1M0,P63158,Q9EPB4,Q8VIJ6,Q99K48,Q8K310,Q8C2Q3,Q9R002,Q8R326,P0DOV2,Q8CGE8,Q8VCF0,P27641,Q8R409,Q3TBT3,P23475,Q60520,P97313,Q3UMW7,P18654,Q9EPQ1,Q6R5N8,P42225,Q9JLJ1,Q60953,Q6Q899,Q3UIR3,Q8CAS9,Q9Z1R2,O70362,P25911,…	0.0235234	0.0199005
GO:0005102	signaling receptor binding	F	Q9R160,Q3U108,P01837,P06330,P18527,P01820,P03987,P56371,P60840	P63017,Q61696,Q8BTM8,P08752,Q9DC51,Q61207,Q9WUD1,B2RSH2,P21279,P27601,P63037,P63094,A2A863,P21278,P27600,Q61210,P18872,P30678,Q8R4H2,P49615,P26450,Q9D1X0,O89110,P70677,Q60855,Q8BJZ3,Q61160,Q3U0V2,Q9JM90,Q99N32,P97300,Q60631,Q64010,Q02013,Q99M51,P35821,P05480,P25911,O08992,Q61772,P59672,P22682,O70624,Q9D1D6,O70421,P48614,Q8BH60,P51141,Q9JLV5,Q9CSN1,Q8BLR9,Q9Z0F8,Q3UHJ0,Q9QXX0,Q9WU42,P15379,Q63961,…	0.0239902	0.0186335
GO:0051704	multi-organism process	P	P01837,P06330,P18527,P01820,Q9R160,P02798,O55042,Q9WTK5,Q9Z108,Q8CAK3,Q3U108	P47713,P11859,Q8C2E7,P97929,P63005,Q6NZC7,B9EKI3,Q8K2K6,Q64010,P11247,Q09014,Q3UP87,Q8CJ91,Q9R0Q3,P20108,Q9JII5,D3Z7P3,P12023,B0F2B4,Q99L45,P49290,Q61878,Q9EPB4,P42225,Q9JLJ1,Q8VCF0,Q3TBT3,Q60953,Q6Q899,Q3UIR3,Q8CAS9,Q60520,P01887,P36371,P10810,Q91VE3,Q9D2Q8,P62821,O35639,Q91V41,P01837,P01901,P01863,P06330,Q61646,P51437,P01867,P18528,P18527,P08905,P18524,P04223,P01872,P01806,P20491,P18525,P01796,…	0.0241989	0.0168971
GO:0060291	long-term synaptic potentiation	P	Q9Z108,O55042	P63011,Q9WV60,P57716,P97484,P08226,P04925,O54885,P63089,P12023,P61979,O89017,Q9Z108,Q61391,Q9Z0J4,P31786,P63085,P63044,P70452,Q9Z2D6,P97300,P28652,O55042,P70227,P49769,P50114,P03995,Q64704,Q03391	0.0252913	0.0714286
GO:0072643	interferon-gamma secretion	P	Q3U108	O08573,Q9QYY1,Q3U108	0.026478	0.333333
GO:0004128	cytochrome-b5 reductase activity, acting on NAD(P)H	F	Q9DB73	Q9DCN2,P37040,Q9DB73	0.026478	0.333333
GO:0007343	egg activation	P	Q9R160	P28652,Q9R160,P51125	0.026478	0.333333
GO:0070494	regulation of thrombin-activated receptor signaling pathway	P	O55042	P54227,O55042,P16056	0.026478	0.333333
GO:0090493	catecholamine uptake	P	O55042	Q99LX0,O55042,P60710	0.026478	0.333333
GO:0046726	positive regulation by virus of viral protein levels in host cell	P	Q9Z108	Q3U1J4,Q8K2C9,Q9Z108	0.026478	0.333333
GO:0002827	positive regulation of T-helper 1 type immune response	P	Q3U108	P10107,Q3U108,P14483	0.026478	0.333333
GO:0051612	negative regulation of serotonin uptake	P	O55042	O55042,P35803,Q9Z0J4	0.026478	0.333333
GO:1902713	regulation of interferon-gamma secretion	P	Q3U108	O08573,Q9QYY1,Q3U108	0.026478	0.333333
GO:0060457	negative regulation of digestive system process	P	Q9Z1W9	Q9Z1W9,P83741,Q7TMS5	0.026478	0.333333
GO:0010919	regulation of inositol phosphate biosynthetic process	P	O55042	Q9JHK5,P0C605,O55042	0.026478	0.333333
GO:0032324	molybdopterin cofactor biosynthetic process	P	Q5RKZ7	Q9Z224,Q8BUV3,Q5RKZ7	0.026478	0.333333
GO:0003330	regulation of extracellular matrix constituent secretion	P	Q8C138	P11859,Q9JHH6,Q8C138	0.026478	0.333333
GO:0050812	regulation of acyl-CoA biosynthetic process	P	O55042	Q922H2,Q9JK42,O55042	0.026478	0.333333
GO:0097524	sperm plasma membrane	C	Q9R160	P11499,Q9R160,P07901	0.026478	0.333333
GO:0045914	negative regulation of catecholamine metabolic process	P	O55042	O88587,O55042,P05555	0.026478	0.333333
GO:1904714	regulation of chaperone-mediated autophagy	P	O55042	P16675,O55042,P03995	0.026478	0.333333
GO:0019911	structural constituent of myelin sheath	F	P60202	P04370,Q8BI08,P60202	0.026478	0.333333
GO:1905076	regulation of interleukin-17 secretion	P	Q3U108	P11103,O08691,Q3U108	0.026478	0.333333
GO:0035743	CD4-positive, alpha-beta T cell cytokine production	P	Q3U108	Q61176,P35762,Q3U108	0.026478	0.333333
GO:0072615	interleukin-17 secretion	P	Q3U108	P11103,O08691,Q3U108	0.026478	0.333333
GO:0098837	postsynaptic recycling endosome	C	P56371	Q9ER00,P56371,Q8VD04	0.026478	0.333333
GO:0042416	dopamine biosynthetic process	P	O55042	Q99LX0,Q9EQH3,O55042	0.026478	0.333333
GO:0072538	T-helper 17 type immune response	P	Q3U108	P42227,Q01965,Q3U108	0.026478	0.333333
GO:0016849	phosphorus-oxygen lyase activity	F	Q5RKZ7	Q01341,Q5RKZ7,P56528	0.026478	0.333333
GO:0008298	intracellular mRNA localization	P	Q9Z108	Q8BFV2,P42859,Q9Z108	0.026478	0.333333
GO:0045963	negative regulation of dopamine metabolic process	P	O55042	O88587,O55042,P05555	0.026478	0.333333
GO:0002726	positive regulation of T cell cytokine production	P	Q3U108	P35762,Q3U108,P01887	0.026478	0.333333
GO:0070495	negative regulation of thrombin-activated receptor signaling pathway	P	O55042	P54227,O55042,P16056	0.026478	0.333333
GO:0090186	regulation of pancreatic juice secretion	P	Q9Z1W9	Q9Z1W9,P83741,O70404	0.026478	0.333333
GO:0023016	signal transduction by trans-phosphorylation	P	Q9Z1W9	Q6P9R2,Q9Z1W9,P83741	0.026478	0.333333
GO:0002825	regulation of T-helper 1 type immune response	P	Q3U108	P14483,P10107,Q3U108	0.026478	0.333333
GO:0044815	DNA packaging complex	C	Q8CGP6,Q8CGP7	P10854,Q8CGP2,P84228,P68433,P02301,P62806,P43277,P15864,P43276,P43275,Q8CGP6,Q8CGP7,Q64523,Q8R1M2,P10922,Q9QZQ8,P27661,P0C0S6,Q3TEA8,Q8CCK0,Q64522,Q9JIA7,Q922P9,Q8CIG3,Q8CG47,Q8CG48,Q8K2Z4,P43274,Q3TYA6	0.0270131	0.0689655
GO:0072676	lymphocyte migration	P	Q9Z1W9,Q8C138	P55012,Q6P9R2,O35598,Q9Z1W9,Q9Z0F8,P83741,P47941,Q64010,Q60991,P26041,P13597,Q5SUA5,Q925Q3,Q08642,O55098,Q8BI84,Q8C138,Q61508,P51910,O54901,Q9EPB4,Q9QUI0,O70200,O08573,Q9JLJ1,P12023,O54890,Q8C147,Q61160	0.0270131	0.0689655
GO:0032890	regulation of organic acid transport	P	O55042,Q9Z1W9	P42208,Q8R5J9,Q9JKW0,P49769,Q8JZR0,P35441,Q60823,O08691,Q61176,O55042,O08553,Q9Z1M0,P25085,P0C605,P61922,Q99N16,P97450,Q9QUJ7,P70236,Q9WTU6,Q9Z239,Q9JIP7,P34884,Q80UJ7,Q62028,Q8CGC7,P11404,O08599,P11859,Q9Z1W9	0.0287811	0.0666667
GO:0051048	negative regulation of secretion	P	Q8C138,O55042,Q9Z1W9	Q00623,P09813,P04441,P97449,P63094,O88587,P09470,Q8C138,P22437,P25085,P0C605,P61922,Q8BW75,Q69ZP3,Q60738,P23242,Q99N16,P97450,Q9QUJ7,P55772,P14901,Q18PI6,Q5SSL4,O08573,P10107,O55042,Q99JI6,P08752,Q60770,Q9CR00,Q61425,O09106,P12382,P63328,P35235,Q9Z0J4,E9Q4S1,Q60994,P08226,P57759,Q8K0C4,Q80YD6,Q80WQ6,Q9QWI6,Q60953,P27931,Q9D154,Q9D2C7,P35329,A2CG49,P11589,Q9JIX0,P97820,P81117,Q8R361,P03958,Q9Z1W9,…	0.0315241	0.0384615
GO:2001023	regulation of response to drug	P	O55042,Q9Z1W9	P42208,Q8R5J9,Q9JKW0,P49769,O08691,Q61176,Q9Z0F7,O55042,P68404,P46096,Q9R0W9,P55772,P61922,Q99P72,P35235,Q60855,Q9QUH0,Q3TRM8,P16056,Q925B0,Q9Z2V5,Q99JT2,Q99LX0,P10639,Q61207,Q9D1X0,P68040,Q61699,Q9CQN1,P11859,Q9Z1W9,Q99P87	0.0324522	0.0625
GO:0043154	negative regulation of cysteine-type endopeptidase activity involved in apoptotic process	P	O55042,Q6P4S8	Q9D1X0,Q99LX0,P41245,Q8CIN4,O70456,P23927,P17879,P11352,P06745,Q62167,P37040,Q9D1L9,Q61249,P31428,Q02013,P35441,Q8VCH6,O54946,Q9R002,Q9JKW0,Q60737,O55042,O70201,P05480,P15379,P18654,Q8VDP3,Q99M87,Q8BY87,Q60823,Q6P4S8,B2RWS6	0.0324522	0.0625
GO:0050778	positive regulation of immune response	P	P01837,P06330,P18527,P01820,Q3U108	P01027,P01867,P20491,P01868,P35991,P04104,P41317,P39039,P97290,P63017,P01899,P01901,P23492,O70439,P01897,Q921M7,P04223,P14429,P06800,P01887,P01900,P36371,P11609,Q61160,Q9Z1M0,P63158,Q9EPB4,Q8VIJ6,Q99K48,Q8K310,Q8C2Q3,Q9R002,Q8R326,P0DOV2,Q8CGE8,Q8VCF0,P27641,Q8R409,Q3TBT3,P23475,Q60520,P97313,Q3UMW7,P18654,Q9EPQ1,Q6R5N8,Q9Z1R2,O70362,P25911,P03958,P28078,Q91VR5,Q9JIK5,Q6Q899,Q63844,P17710,Q99MN1,…	0.0341496	0.0243902
GO:0042762	regulation of sulfur metabolic process	P	O55042	O55042,Q922H2,Q9JK42,O88587	0.0351508	0.25
GO:1903054	negative regulation of extracellular matrix organization	P	Q8C138	Q8C138,P28843,P97321,Q99K41	0.0351508	0.25
GO:0032225	regulation of synaptic transmission, dopaminergic	P	O55042	O08917,O55042,Q69ZP3,Q99P47	0.0351508	0.25
GO:0036016	cellular response to interleukin-3	P	P02798	P02798,Q9WV60,Q62120,P52332	0.0351508	0.25
GO:1903136	cuprous ion binding	F	O55042	Q99LX0,P04925,O55042,Q64430	0.0351508	0.25
GO:0015874	norepinephrine transport	P	O55042	P22437,P11859,P60710,O55042	0.0351508	0.25
GO:0010273	detoxification of copper ion	P	P02798	Q99LX0,P02802,P02798,Q64430	0.0351508	0.25
GO:0051611	regulation of serotonin uptake	P	O55042	O55042,P35803,Q9Z0J4,O54890	0.0351508	0.25
GO:0033239	negative regulation of cellular amine metabolic process	P	O55042	O88587,O55042,P05555,Q6Q477	0.0351508	0.25
GO:0071294	cellular response to zinc ion	P	P02798	P02802,P02798,Q9JJX6,Q3U2S8	0.0351508	0.25
GO:0030157	pancreatic juice secretion	P	Q9Z1W9	Q9Z1W9,P83741,O70404,Q8CIE6	0.0351508	0.25
GO:0016653	oxidoreductase activity, acting on NAD(P)H, heme protein as acceptor	F	Q9DB73	P37040,Q9Z0J4,Q9DCN2,Q9DB73	0.0351508	0.25
GO:0051581	negative regulation of neurotransmitter uptake	P	O55042	Q8R5J9,O55042,P35803,Q9Z0J4	0.0351508	0.25
GO:0140052	cellular response to oxidised low-density lipoprotein particle stimulus	P	Q8C138	Q08857,Q8BI84,P31996,Q8C138	0.0351508	0.25
GO:0019870	potassium channel inhibitor activity	F	P60840	P49817,P60840,P51637,P83741	0.0351508	0.25
GO:0002467	germinal center formation	P	Q9WTK5	P03958,P28078,Q9WTK5,Q9Z0F8	0.0351508	0.25
GO:0051610	serotonin uptake	P	O55042	O54890,O55042,P35803,Q9Z0J4	0.0351508	0.25
GO:0071476	cellular hypotonic response	P	Q9Z1W9	Q924N4,Q6P9R2,Q6PDN3,Q9Z1W9	0.0351508	0.25
GO:1990169	stress response to copper ion	P	P02798	Q99LX0,P02802,P02798,Q64430	0.0351508	0.25
GO:0036015	response to interleukin-3	P	P02798	P02798,Q9WV60,Q62120,P52332	0.0351508	0.25
GO:0006971	hypotonic response	P	Q9Z1W9	Q6P9R2,Q6PDN3,Q9Z1W9,Q924N4	0.0351508	0.25
GO:0071391	cellular response to estrogen stimulus	P	Q3U108	Q8BP27,P97765,Q9DBD5,Q3U108	0.0351508	0.25
GO:0001676	long-chain fatty acid metabolic process	P	Q8C138,P60202	O35678,Q63844,P55249,P39654,Q91WC9,Q64429,P47713,Q99N16,Q9EP75,P22437,P33267,P12791,P12790,Q05421,P51174,P48410,P54310,Q8C138,Q9QYS9,P60202,Q99PU5,Q99104,P34914,Q91V12,P41216,O55137,Q8JZR0,Q8JZN5,Q91VE0,Q9QYR9,Q08857,Q60714,P97742,O88561	0.0362974	0.0588235
GO:0002253	activation of immune response	P	P01837,P06330,P18527,P01820	P04104,P41317,P39039,P97290,P01027,P63158,Q9EPB4,Q8VIJ6,Q99K48,Q8K310,Q8C2Q3,Q9R002,Q8R326,P0DOV2,Q8CGE8,Q8VCF0,P27641,Q8R409,Q3TBT3,P23475,Q60520,P97313,Q3UMW7,P18654,Q9EPQ1,Q6R5N8,Q9Z1R2,O70362,P20491,P25911,P63038,Q9WUU8,Q91WK0,P06909,P04186,P01029,Q8K182,P03953,P06684,P11680,P06683,Q8BH35,P01837,P01863,P06330,P01867,P18528,P18527,P18524,P01872,P01806,P18525,P01796,O35658,Q61129,P01820,P01786,…	0.0372992	0.027972
GO:0009986	cell surface	C	P01837,P06330,P18527,P01820,Q9R160,Q8C138	P48036,P09103,P14211,Q8K0E8,P01899,P01837,P10605,P01901,P01863,P06330,P16110,P14483,P01867,Q9JHR7,O08529,P01897,P18528,P0CW02,P18527,P18524,Q8VCM7,P04223,P21956,P06797,Q9Z1Q4,P01872,Q08857,P01806,P20491,Q64726,P97449,P18525,P19221,P09055,P01796,E9PV24,P03958,P14429,Q8VCT3,P47791,Q9WTR5,P13597,P01831,Q61739,Q8CJ91,P35441,O08917,Q64314,P14438,Q8VBZ3,P04441,P01820,Q2VLH6,P06800,P11438,P01786,Q62351,…	0.0382572	0.0211268
GO:0006865	amino acid transport	P	O55042,Q9Z1W9	P42208,Q8R5J9,Q9JKW0,P49769,Q62011,Q5I012,Q8BWH0,Q8BH59,Q9QXX4,Q9D6M3,P43006,P56564,P51912,O08691,Q61176,Q9Z0G0,Q64331,O55042,O08553,Q9Z1M0,P25085,P0C605,P61922,P10852,Q8CGA3,Q9QXW9,Q9Z127,Q91W98,Q99JR1,Q9JIP7,Q80UJ7,P28867,O08599,P11859,Q9Z1W9	0.0382831	0.0571429
GO:0098552	side of membrane	C	P01837,P06330,P18527,P01820,Q9R160	P48036,P09103,P14211,Q8K0E8,P01899,P01837,P10605,P01901,P01863,P06330,P16110,P14483,P01867,Q9JHR7,O08529,P01897,P18528,P0CW02,P18527,P18524,Q8VCM7,P04223,P21956,P06797,Q9Z1Q4,P01872,Q08857,P01806,P20491,Q64726,P97449,P18525,P19221,P09055,P01796,E9PV24,P03958,P14429,Q8VCT3,P47791,Q9WTR5,P13597,P01831,Q61739,Q8CJ91,P35441,O08917,Q64314,P14438,Q8VBZ3,P04441,P01820,Q2VLH6,P06800,P11438,P01786,Q62351,…	0.040002	0.0233645
GO:0016573	histone acetylation	P	Q3U108,O55042	Q61164,Q9WTM5,Q63844,Q3U108,Q9Z0J4,Q9JHD2,B2RWS6,Q7TQA3,O88712,O55042,Q9JKP7,Q3TKT4,P61965,Q6IE82,Q99PP9,B2RRD7,P97929,P60122,Q9Z2N8,Q80W54,Q9JIA7,Q8CGY8,Q9D1P2,Q61191,P97765,Q8C1D8,Q9Z0H3,Q60520,O35280,P97471,Q9D906,Q99J83,Q9Z2D8,Q6PGB6,Q9Z2D6,P25916	0.0403098	0.0555556
GO:2000117	negative regulation of cysteine-type endopeptidase activity	P	O55042,Q6P4S8	O70456,P23927,P17879,P11352,P06745,Q62167,P37040,Q9D1L9,Q61249,Q9D1X0,P31428,Q02013,P35441,Q8VCH6,O54946,Q9R002,Q9JKW0,Q60737,O55042,O70201,P05480,P15379,P18654,Q8VDP3,Q99M87,Q8BY87,Q60823,Q6P4S8,B2RWS6,P51125,Q99LX0,P41245,Q8CIN4,P08071,Q8BFV2,P42859	0.0403098	0.0555556
GO:0051341	regulation of oxidoreductase activity	P	O55042,Q9QZH6	P25799,O55042,P37040,P10287,Q99LX0,P08752,Q9DC51,Q8CFV9,Q61462,Q01279,P0DP27,P08226,P56565,P32883,Q61009,P49817,Q6Q477,Q9WV60,P51637,P51569,O08691,Q63961,P46656,Q9WU84,O08573,Q64430,P99029,Q61646,Q91ZE0,Q8BGA9,O70423,O35129,Q9JIA7,P48999,P19157,Q9QZH6	0.0403098	0.0555556
GO:0045069	regulation of viral genome replication	P	Q9Z108,Q8CAK3	Q9QY76,Q9WV55,P63017,P24369,P54116,Q80XU3,P35922,P17742,P29341,Q62167,Q9CR16,Q3U1J4,Q8K2C9,Q9D868,P54726,O70551,Q6ZQ58,O54781,Q9Z108,Q3TIU4,O54962,P08071,Q99J93,Q9Z1X4,Q8R2Q8,P97430,Q8VCF0,Q99J72,Q8CAK3,Q8CIE4,Q62318,Q8C5L6,Q3TYA6,Q64511,Q01320,Q61656	0.0403098	0.0555556
GO:0032410	negative regulation of transporter activity	P	Q9Z1W9,O55042	Q921K8,P20444,Q8BH60,P70441,P0DP27,Q6P069,O09131,O09161,P09813,Q9JI91,P51637,Q6P9R2,Q9Z1W9,P62259,P63330,Q8R317,Q9ES90,P35922,Q9ESD7,O88667,Q99M08,P63166,Q2TUM3,G5E8K5,P86044,Q6PIE5,Q04646,A2ASQ1,P49817,Q3UHD6,Q99LX0,Q99KR7,Q6PHZ2,P46935,P41245,O55042,Q99LJ0	0.0423764	0.0540541
GO:0098961	dendritic transport of ribonucleoprotein complex	P	Q9Z108	Q8VEK3,Q8VIJ6,P42669,P28738,Q9Z108	0.0437481	0.2
GO:0010040	response to iron(II) ion	P	O55042	O70362,P28271,Q91VR7,O55042,O88597	0.0437481	0.2
GO:0010669	epithelial structure maintenance	P	Q8CJ40	Q9Z1Z2,Q00724,Q5PR69,P97792,Q8CJ40	0.0437481	0.2
GO:0045494	photoreceptor cell maintenance	P	Q8CJ40	Q8CJ40,Q9DBI2,Q8BP00,O35600,Q8VHN7	0.0437481	0.2
GO:0006777	Mo-molybdopterin cofactor biosynthetic process	P	Q5RKZ7	Q9Z224,Q8BUV3,Q5RKZ7,Q9Z1J3,A2BDX3	0.0437481	0.2
GO:0031434	mitogen-activated protein kinase kinase binding	F	Q9QUR7	Q61249,Q9QUR7,P09470,Q811D0,Q80XI6	0.0437481	0.2
GO:1902932	positive regulation of alcohol biosynthetic process	P	O55042	P37040,Q920E5,P32020,Q99J08,O55042	0.0437481	0.2
GO:0042758	long-chain fatty acid catabolic process	P	Q8C138	Q99N16,P51174,P48410,P54310,Q8C138	0.0437481	0.2
GO:0098845	postsynaptic endosome	C	P56371	Q9ER00,P56371,Q8VD04,Q9CQD1,Q9WV80	0.0437481	0.2
GO:0098963	dendritic transport of messenger ribonucleoprotein complex	P	Q9Z108	P28738,Q8VEK3,Q8VIJ6,P42669,Q9Z108	0.0437481	0.2
GO:0046719	regulation by virus of viral protein levels in host cell	P	Q9Z108	Q9QY76,P42225,Q3U1J4,Q8K2C9,Q9Z108	0.0437481	0.2
GO:0051189	prosthetic group metabolic process	P	Q5RKZ7	Q9Z224,Q8BUV3,Q5RKZ7,Q9Z1J3,A2BDX3	0.0437481	0.2
GO:0032039	integrator complex	C	Q6P4S8	Q7TPD0,Q9CWS4,Q8K114,Q8CIM8,Q6P4S8	0.0437481	0.2
GO:0010820	positive regulation of T cell chemotaxis	P	Q9Z1W9	Q6P9R2,O35598,Q9Z1W9,Q9Z0F8,P83741	0.0437481	0.2
GO:0070278	extracellular matrix constituent secretion	P	Q8C138	P11859,Q9JHH6,Q8C138,Q9DAV9,Q63961	0.0437481	0.2
GO:0010819	regulation of T cell chemotaxis	P	Q9Z1W9	Q6P9R2,O35598,Q9Z1W9,Q9Z0F8,P83741	0.0437481	0.2
GO:0019956	chemokine binding	F	Q9R1Q7	Q810W6,P09055,P43406,Q9R1Q7,Q62011	0.0437481	0.2
GO:0009713	catechol-containing compound biosynthetic process	P	O55042	O55042,Q9CXI3,Q64430,Q99LX0,Q9EQH3	0.0437481	0.2
GO:0019720	Mo-molybdopterin cofactor metabolic process	P	Q5RKZ7	Q9Z224,Q8BUV3,Q5RKZ7,Q9Z1J3,A2BDX3	0.0437481	0.2
GO:2000402	negative regulation of lymphocyte migration	P	Q8C138	Q08642,P51910,O54901,Q8BI84,Q8C138	0.0437481	0.2
GO:0042423	catecholamine biosynthetic process	P	O55042	O55042,Q9CXI3,Q64430,Q99LX0,Q9EQH3	0.0437481	0.2
GO:0050815	phosphoserine residue binding	F	Q9QUR7	Q5XJE5,P62259,Q9CQV8,Q9QUR7,P46935	0.0437481	0.2
GO:0048535	lymph node development	P	Q9WTK5	Q62011,P25799,Q61160,Q9WTK5,Q8K409	0.0437481	0.2
GO:0043545	molybdopterin cofactor metabolic process	P	Q5RKZ7	Q9Z224,Q8BUV3,Q5RKZ7,Q9Z1J3,A2BDX3	0.0437481	0.2
GO:0140131	positive regulation of lymphocyte chemotaxis	P	Q9Z1W9	Q6P9R2,O35598,Q9Z1W9,Q9Z0F8,P83741	0.0437481	0.2
GO:0061687	detoxification of inorganic compound	P	P02798	Q99LX0,P02802,P02798,Q64430,Q60738	0.0437481	0.2
GO:0018393	internal peptidyl-lysine acetylation	P	Q3U108,O55042	Q9WTM5,P60122,Q9Z2D8,Q6PGB6,Q9Z2D6,P25916,Q9D1P2,B2RWS6,Q61164,Q63844,Q3U108,Q9Z0J4,Q9JHD2,Q7TQA3,O88712,O55042,Q9JKP7,Q3TKT4,P61965,Q6IE82,Q99PP9,B2RRD7,P97929,Q9Z2N8,Q80W54,Q9JIA7,Q8CGY8,Q61191,P97765,Q8C1D8,Q9Z0H3,Q60520,O35280,P97471,Q9D906,Q99J83,P37040,Q9Z1R2	0.0444823	0.0526316
GO:0002684	positive regulation of immune system process	P	P01837,P06330,P18527,P01820,Q9Z1W9,Q3U108	P01027,P01867,P20491,P01868,P35991,P04104,P41317,P39039,P97290,P63017,P01899,P01901,P23492,O70439,P01897,Q921M7,P04223,P14429,P06800,P01887,P01900,P36371,P11609,Q61160,Q9Z1M0,P63158,Q9EPB4,Q8VIJ6,Q99K48,Q8K310,Q8C2Q3,Q9R002,Q8R326,P0DOV2,Q8CGE8,Q8VCF0,P27641,Q8R409,Q3TBT3,P23475,Q60520,P97313,Q3UMW7,P18654,Q9EPQ1,Q6R5N8,Q9Z1R2,O70362,P25911,P14483,P04441,P03958,P28078,Q91X72,O70423,Q08481,Q8BI84,…	0.0447717	0.020339
GO:0009605	response to external stimulus	P	P01837,P06330,P18527,P01820,P02798,Q9Z1W9,Q8C138,O55042,Q9WTK5,Q8CAK3,Q3U108	Q8K2T1,Q91YU8,P01027,P01867,P20491,P01868,P35991,P08101,P97290,Q64010,P11247,Q09014,Q3UP87,Q8CJ91,Q9Z2D6,Q9QZQ0,Q03391,Q09XV5,B2RWS6,P08226,Q8BHJ5,Q9D4G9,Q8K3G9,O88307,P49290,Q61878,Q9EPB4,P42225,Q9JLJ1,Q8VCF0,Q3TBT3,Q60953,Q6Q899,Q3UIR3,Q8CAS9,Q60520,P63089,Q61805,P01887,P36371,P10810,Q6P9J9,E9Q7D5,Q80YC5,P10107,Q9CZX8,P16110,Q9QY06,P63001,P19157,P34884,O70423,P30355,Q91VE3,Q9R1P4,P11352,P99026,…	0.0461841	0.015299
GO:0051219	phosphoprotein binding	F	Q9QUR7,O55042	Q60631,P63085,P47941,Q63844,Q64010,P29351,P35235,Q04736,P24638,Q9JM90,P14234,P26450,Q8CIH5,P22682,P62259,Q9CQV8,Q9QUR7,P46935,Q5XJE5,O70456,P30416,Q62188,P63005,O08795,Q8BK63,Q60739,Q569Z6,O55042,Q9R099,P05480,Q80X95,P25911,P15379,O35098,P48193,Q07113,Q9Z0J4,Q9JLN9,Q62077	0.0466266	0.0512821
GO:0006897	endocytosis	P	P01837,P06330,P18527,P01820,P56371,O55042	O89053,Q9R0M3,Q9Z1M0,P39054,P39053,P46460,O08917,P28663,P55302,Q80UP5,O08992,P35922,O70305,P84091,Q9D6K5,P41731,Q9D5T0,Q8CIH5,Q99NH2,Q8CFE4,Q62419,Q8CHC4,P56480,P08226,P40124,Q68FD5,Q61830,P11835,Q08857,Q62418,Q60598,O88531,Q05793,Q9JKY5,O35114,Q91ZX7,P08101,Q7M6Y3,P05555,Q01279,Q91VH2,P30204,P35951,Q99KY4,P10810,Q8BGT6,O54916,Q62028,Q9EQP2,Q9D8U8,P10107,O35639,Q9CQD1,P97384,Q9WUM4,P09055,Q9ERE7,…	0.0473056	0.0200669
GO:0006475	internal protein amino acid acetylation	P	Q3U108,O55042	Q9WTM5,P60122,Q9Z2D8,Q6PGB6,Q9Z2D6,P25916,Q9D1P2,B2RWS6,P37040,Q9Z1R2,Q9JHD2,Q61164,Q63844,Q3U108,Q9Z0J4,Q7TQA3,O88712,O55042,Q9JKP7,Q3TKT4,P61965,Q6IE82,Q99PP9,B2RRD7,P97929,Q9Z2N8,Q80W54,Q9JIA7,Q8CGY8,Q61191,P97765,Q8C1D8,Q9Z0H3,Q60520,O35280,P97471,Q9D906,Q99J83,P08249,Q9Z2V4	0.0488084	0.05
