# Supplementary material for: Proteomics and lipidomics reveal the protective mechanism of dietary n-3 PUFA supplementation for photoaging
Source: Royal Society of Chemistry journal article supplement (doi:10.1039/d0fo03228j), 2021-01-01
Supplement: d0fo03228j4.xlsx [file d0fo03228j4.xlsx]

## Sheet: Sheet 1
Name	DIFF	LipidIon	LipidGroup	Class	FattyAcid	FA1	FA2	FA3	IonFormula	CalMz	Fold.Change	P-value	VIP	UC-2	UC-3	UC-4	UC-5	UC-6	UC-7	UF-2	UF-3	UF-4	UF-5	UF-6	UF-7	status
1080POS	Y	TG(18:1/18:1/18:3)+NH4	TG(54:5)+NH4	TG	(18:1/18:1/18:3)	(18:1)	(18:1)	(18:3)	C57 H104 O6 N1	898.786	0.328227	5.12071e-05	10.7828	60546703604	53795010983	52165067502	33721236456	39681778063	53576564093	23821442998	11217031241	18680683523	12481023467	7968610378	22161458295	Down
995POS	Y	TG(16:0/18:1/18:3)+NH4	TG(52:4)+NH4	TG	(16:0/18:1/18:3)	(16:0)	(18:1)	(18:3)	C55 H102 O6 N1	872.77	0.631876	0.0244144	8.5135	54721614786	48163671466	52889320922	38121841485	46188189501	57190493041	50360748518	16346693604	25170774773	34791846567	14063757136	47107181538	Down
1074POS	Y	TG(18:1/18:2/18:3)+NH4	TG(54:6)+NH4	TG	(18:1/18:2/18:3)	(18:1)	(18:2)	(18:3)	C57 H102 O6 N1	896.77	0.220258	0.000276926	8.43335	42062679619	29835465290	29058538619	13996648004	23255596538	33134932809	11093958276	3628638749	6074714562	5284039012	2515095254	9143459430	Down
986POS	Y	TG(16:1/18:1/18:3)+NH4	TG(52:5)+NH4	TG	(16:1/18:1/18:3)	(16:1)	(18:1)	(18:3)	C55 H100 O6 N1	870.755	0.414345	0.000275001	7.14372	30977647775	27188505745	24134333634	17760560969	19584590002	28399234364	14816846463	5223764903	12157797224	8039814200	7310623686	13792864444	Down
1131POS	Y	TG(16:0/18:2/22:6)+NH4	TG(56:8)+NH4	TG	(16:0/18:2/22:6)	(16:0)	(18:2)	(22:6)	C59 H102 O6 N1	920.77	25.0731	0.000564986	6.00419	9.16691e+08	9.17001e+08	3.8194e+08	2.81255e+08	4.15559e+08	5.02377e+08	21461647799	6596644123	18863161774	9969334523	8129600815	20599765146	Up
1138POS	Y	TG(16:0/18:1/22:6)+NH4	TG(56:7)+NH4	TG	(16:0/18:1/22:6)	(16:0)	(18:1)	(22:6)	C59 H104 O6 N1	922.786	18.3105	3.2132e-05	5.89448	8.16456e+08	1574584455	4.32807e+08	3.43532e+08	4.89487e+08	5.18921e+08	15516238776	5031850070	14779520736	12777383471	12011002441	16344864983	Up
1652NEG	Y	PE(16:0p/20:5)-H	PE(36:5p)-H	PE	(16:0p/20:5)	(16:0p)	(20:5)		C41 H71 O7 N1 P1	720.497	61.3471	2.04226e-08	5.70711	1.39148e+07	2.65256e+07	9.65898e+06	7.67421e+06	1.21782e+07	4.87021e+06	8.81059e+08	8.73706e+08	8.22544e+08	749327070	5.93768e+08	6.6971e+08	Up
1004POS	Y	TG(16:0/18:1/18:1)+NH4	TG(52:2)+NH4	TG	(16:0/18:1/18:1)	(16:0)	(18:1)	(18:1)	C55 H106 O6 N1	876.801	1.67552	0.00407799	5.68238	25723244593	21974888206	25222572106	11695983197	21935376205	22174683979	45740659579	23980756357	37471643101	36565582049	29303888029	42621246810	Up
1898NEG	Y	PC(16:0/22:6)+HCOO	PC(38:6)+HCOO	PC	(16:0/22:6)	(16:0)	(22:6)		C47 H81 O10 N1 P1	850.56	4.35824	0.000918765	5.16819	9.14079e+07	2.34662e+08	1.75471e+08	1.71723e+08	2.64337e+08	176778484	1148047242	4.12906e+08	7.33669e+08	1150628605	4.732e+08	9.3829e+08	Up
677POS	Y	PC(36:4)+H	PC(36:4)+H	PC	(16:0/20:4)	(16:0)	(20:4)		C44 H81 O8 N1 P1	782.569	0.444565	3.95444e-06	5.07856	12415365628	13667935641	12623387695	10665587405	14570252689	10890611320	6583485668	5369122419	5611466119	6350487674	3514352038	5839257706	Down
1179POS	Y	TG(18:1/18:2/22:6)+NH4	TG(58:9)+NH4	TG	(18:1/18:2/22:6)	(18:1)	(18:2)	(22:6)	C61 H104 O6 N1	946.786	13.5664	5.33575e-05	4.95003	9.65653e+08	1139392606	3.98738e+08	5.77837e+08	4.00348e+08	6.67006e+08	12465768480	4263198047	12404504193	7901087947	8447413591	10804752562	Up
1745NEG	Y	PE(16:0/22:6)-H	PE(38:6)-H	PE	(16:0/22:6)	(16:0)	(22:6)		C43 H73 O8 N1 P1	762.508	2.49877	0.00226358	4.84711	3.06995e+08	5.02627e+08	280585862	3.07849e+08	4.24238e+08	278902347	1350627262	6.12731e+08	8.52792e+08	1008340501	4.98796e+08	9.27112e+08	Up
1801NEG	Y	PE(18:1/22:5)-H	PE(40:6)-H	PE	(18:1/22:5)	(18:1)	(22:5)		C45 H77 O8 N1 P1	790.539	2.77695	0.00156555	4.77832	1.72252e+08	3.65091e+08	2.59458e+08	2.58259e+08	3.90264e+08	2.47599e+08	7.44605e+08	5.19214e+08	8.23052e+08	1233603956	4.87397e+08	8.93296e+08	Up
1069POS	Y	TG(16:0/16:1/22:6)+NH4	TG(54:7)+NH4	TG	(16:0/16:1/22:6)	(16:0)	(16:1)	(22:6)	C57 H100 O6 N1	894.755	31.2678	9.36834e-05	4.76972	3.52887e+08	5.56784e+08	1.47496e+08	1.47212e+08	1.74707e+08	218865313	9898253975	3030370789	10010287631	9342391907	6132348494	11550769395	Up
926POS	Y	TG(16:0/16:0/18:1)+NH4	TG(50:1)+NH4	TG	(16:0/16:0/18:1)	(16:0)	(16:0)	(18:1)	C53 H104 O6 N1	850.786	2.57162	0.00119211	4.74479	7615297204	7196778830	8408994787	4267256177	9.58539e+08	6911569889	15336513724	8255185914	14790690136	18287865903	13649388417	20608966044	Up
1185POS	Y	TG(18:1/18:1/22:6)+NH4	TG(58:8)+NH4	TG	(18:1/18:1/22:6)	(18:1)	(18:1)	(22:6)	C61 H106 O6 N1	948.801	12.5524	3.41788e-05	4.71516	4.65312e+08	1241285016	6.80719e+08	3.27454e+08	6.99822e+08	6.96526e+08	12811266838	5437045760	10525028142	8216527515	6260744398	8353847219	Up
923POS	Y	TG(16:0/16:1/18:1)+NH4	TG(50:2)+NH4	TG	(16:0/16:1/18:1)	(16:0)	(16:1)	(18:1)	C53 H102 O6 N1	848.77	1.60399	0.0039508	4.69117	21516654935	18679636464	20990104245	14467751709	17364166255	18828227912	29501429684	19489106890	31258836009	31569616641	26793223256	40788361968	Up
1713NEG	Y	PE(16:0p/22:6)-H	PE(38:6p)-H	PE	(16:0p/22:6)	(16:0p)	(22:6)		C43 H73 O7 N1 P1	746.513	2.56815	0.000289472	4.44032	1.9277e+08	4.39504e+08	2.30755e+08	2.06255e+08	3.54098e+08	1.97041e+08	7.01899e+08	6.32259e+08	7.51294e+08	9.36181e+08	4.40894e+08	6.98961e+08	Up
1657NEG	Y	PE(36:4p)-H	PE(36:4p)-H	PE	(36:4p)	(36:4p)			C41 H73 O7 N1 P1	722.513	0.427483	0.000201315	4.19259	9.64027e+08	1380010510	1028033125	8.6966e+08	1189195092	7.69793e+08	3.08533e+08	5.01579e+08	5.10668e+08	611450054	2.86968e+08	4.31502e+08	Down
820POS	Y	TG(16:0/16:1/16:1)+NH4	TG(48:2)+NH4	TG	(16:0/16:1/16:1)	(16:0)	(16:1)	(16:1)	C51 H98 O6 N1	820.739	1.84074	0.00485623	4.15837	9967350730	12459200974	9416989073	4101945534	7672410931	9549705362	14740140093	9750299662	17623538665	18549591697	14941868924	22262267402	Up
1096POS	Y	TG(16:0/18:1/20:1)+NH4	TG(54:2)+NH4	TG	(16:0/18:1/20:1)	(16:0)	(18:1)	(20:1)	C57 H110 O6 N1	904.833	2.36473	0.00144291	4.06517	5500109651	4458754941	5963913498	2528558997	4927785534	5777606182	17599772844	8436502045	11281607000	10602710239	8038004787	12989235319	Up
1799NEG	Y	PE(22:5/18:2)-H	PE(40:7)-H	PE	(22:5/18:2)	(22:5)	(18:2)		C45 H75 O8 N1 P1	788.524	2.21979	0.00346717	4.05784	2.57846e+08	4.08525e+08	3.00156e+08	2.87906e+08	3.56602e+08	2.67407e+08	1120379822	7.23895e+08	6.86662e+08	619996731	3.8867e+08	6.30149e+08	Up
965POS	Y	TG(16:0/17:1/18:1)+NH4	TG(51:2)+NH4	TG	(16:0/17:1/18:1)	(16:0)	(17:1)	(18:1)	C54 H104 O6 N1	862.786	4.19527	0.00239508	3.97451	2383189119	2098723569	2338199817	1110488542	2640586536	2207500365	13806141907	4444425064	11310573052	8867934314	3658214072	11522762573	Up
762POS	Y	PC(36:3)+Na	PC(36:3)+Na	PC	(36:3)	(36:3)			C44 H82 O8 N1 P1 Na1	806.567	5.6342	0.00118033	3.96087	6.90196e+08	2016301187	1262646389	1214049790	2115085781	1235825681	11540072646	3907222773	7609558336	12161605049	4000984492	8863432180	Up
1750NEG	Y	PE(18:0/20:4)-H	PE(38:4)-H	PE	(18:0/20:4)	(18:0)	(20:4)		C43 H77 O8 N1 P1	766.539	0.447733	0.00144549	3.92728	8.93079e+08	1582828821	1001621529	8.09264e+08	1046389221	7.91044e+08	3.19951e+08	5.1927e+08	4.90844e+08	622284407	3.10056e+08	4.79615e+08	Down
1655NEG	Y	PG(16:0/16:0)-H	PG(32:0)-H	PG	(16:0/16:0)	(16:0)	(16:0)		C38 H74 O10 N0 P1	721.503	5.07891	4.08246e-07	3.87223	1.05418e+08	9.93779e+07	7.04168e+07	6.21409e+07	7.74032e+07	7.46573e+07	4.93967e+08	4.55007e+08	4.35378e+08	405673892	293263299	4.02402e+08	Up
1721NEG	Y	PE(38:5e)-H	PE(38:5e)-H	PE	(38:5e)	(38:5e)			C43 H77 O7 N1 P1	750.544	0.096478	0.00017111	3.76398	6.21229e+08	7.84118e+08	4.31736e+08	3.35983e+08	4.45301e+08	2.99838e+08	3.95125e+07	6.27316e+07	5.54019e+07	72775649	4.74252e+06	4.63782e+07	Down
1720NEG	Y	PE(38:4p)-H	PE(38:4p)-H	PE	(38:4p)	(38:4p)			C43 H77 O7 N1 P1	750.544	0.335023	1.32323e-05	3.64787	5.69237e+08	8.02387e+08	685003005	4.83328e+08	7.3448e+08	5.6059e+08	1.58206e+08	261386422	2.14538e+08	2.88885e+08	1.63038e+08	1.9877e+08	Down
1075POS	Y	TG(18:2/18:2/18:2)+NH4	TG(54:6)+NH4	TG	(18:2/18:2/18:2)	(18:2)	(18:2)	(18:2)	C57 H102 O6 N1	896.77	18.6312	0.000133264	3.60553	364898356	4.46016e+08	2.10773e+08	1.83309e+08	1.8887e+08	1.74489e+08	5478276589	1478970948	5555747604	6231183690	3971391167	6504768813	Up
1009POS	Y	TG(18:0/16:0/18:1)+NH4	TG(52:1)+NH4	TG	(18:0/16:0/18:1)	(18:0)	(16:0)	(18:1)	C55 H108 O6 N1	878.817	3.16835	0.000657918	3.42784	2460262916	1872736091	2686480094	9.9401e+08	2254318619	2122566324	8988782174	3311761895	6185587065	7192417552	4976732877	8601803156	Up
1132POS	Y	TG(16:1/18:2/22:5)+NH4	TG(56:8)+NH4	TG	(16:1/18:2/22:5)	(16:1)	(18:2)	(22:5)	C59 H102 O6 N1	920.77	6.09396	0.00100028	3.41783	7.623e+08	7.32076e+08	5.30539e+08	434800584	5.32097e+08	2208968739	9393232690	2977376577	5772793720	3750582708	4416459754	5382880284	Up
1142POS	Y	TG(18:1/18:1/20:4)+NH4	TG(56:6)+NH4	TG	(18:1/18:1/20:4)	(18:1)	(18:1)	(20:4)	C59 H106 O6 N1	924.801	2.95617	0.00283366	3.4136	4412565894	3980840316	1215162123	1045933783	2275376647	1309069876	10072782012	3067751315	7088874964	7673957938	5428635662	8760717089	Up
1048POS	Y	TG(18:1/17:1/18:1)+NH4	TG(53:3)+NH4	TG	(18:1/17:1/18:1)	(18:1)	(17:1)	(18:1)	C56 H106 O6 N1	888.801	2.6354	0.0320518	3.36965	4003076637	1942419050	3484320541	1347936484	1516651845	5718760578	16985777928	6728909877	6773569964	4604777327	6474537124	5904235837	Up
1423NEG	Y	Cer(d16:0/18:1+O)+HCOO	Cer(d34:1+O)+HCOO	Cer	(d16:0/18:1+O)	(d16:0)	(18:1+O)		C35 H68 O6 N1	598.505	0.374167	0.0427724	3.15544	1667809794	5.53789e+08	4.42774e+08	8.30846e+08	3.33214e+08	7.01658e+08	5.16568e+08	3.50863e+08	2.57975e+08	2.14122e+08	1.72542e+08	1.8294e+08	Down
775POS	Y	PC(38:4)+H	PC(38:4)+H	PC	(18:0/20:4)	(18:0)	(20:4)		C46 H85 O8 N1 P1	810.601	0.414549	0.000149294	3.11164	3981032210	6340351613	4557916757	4133606573	5352179230	3503530735	2044396792	1959638915	1941323657	2495105213	1135510365	1976925960	Down
1053POS	Y	TG(17:0/18:1/18:1)+NH4	TG(53:2)+NH4	TG	(17:0/18:1/18:1)	(17:0)	(18:1)	(18:1)	C56 H108 O6 N1	890.817	3.66106	0.00153616	3.08482	1555392745	1441772749	1992391785	6.40068e+08	1318754495	1433419992	8191321832	2871367761	5320152532	4226699404	3304700387	6772014060	Up
1806NEG	Y	PE(18:0/22:5)-H	PE(40:5)-H	PE	(18:0/22:5)	(18:0)	(22:5)		C45 H79 O8 N1 P1	792.555	0.13354	0.000118268	3.07075	1.9755e+08	2.37149e+08	3.86657e+08	2.69041e+08	5.00786e+08	3.62452e+08	3.60965e+07	3.6098e+07	4.67628e+07	7.27023e+07	2.46805e+07	4.45473e+07	Down
981POS	Y	TG(18:4/16:0/18:2)+NH4	TG(52:6)+NH4	TG	(18:4/16:0/18:2)	(18:4)	(16:0)	(18:2)	C55 H98 O6 N1	868.739	6.19415	0.00488206	2.95569	8.27933e+08	1516241394	5.76782e+08	3.22322e+08	4.81942e+08	5.00217e+08	6846094105	1550747900	3641762239	3759540318	2560638106	7814224655	Up
1809NEG	Y	PE(18:0/22:4)-H	PE(40:4)-H	PE	(18:0/22:4)	(18:0)	(22:4)		C45 H81 O8 N1 P1	794.571	0.0989721	2.59634e-05	2.94351	2.79645e+08	4.46708e+08	2.67291e+08	1.94944e+08	3.03592e+08	2.34049e+08	2.79499e+07	3.21825e+07	2.55751e+07	3.96124e+07	1.5591e+07	2.99376e+07	Down
1175POS	Y	TG(18:2/18:2/22:6)+NH4	TG(58:10)+NH4	TG	(18:2/18:2/22:6)	(18:2)	(18:2)	(22:6)	C61 H102 O6 N1	944.77	14.6147	0.0018811	2.85543	321397884	5.4635e+08	1.3531e+08	6.93078e+07	1.15572e+08	2.22143e+08	5424392424	8.14149e+08	4525441092	2019330552	2702343418	5122215479	Up
1144POS	Y	TG(20:2/18:2/18:2)+NH4	TG(56:6)+NH4	TG	(20:2/18:2/18:2)	(20:2)	(18:2)	(18:2)	C59 H106 O6 N1	924.801	3.17219	0.00340428	2.8529	2653248903	6.6092e+08	5.74992e+08	1248260124	1734951750	2467109507	8062057104	2950716814	2880998206	4899186747	4627142726	6206478770	Up
5POS	Y	So(d17:0)+H	So(d17:0)+H	So	(d17:0)	(d17:0)			C17 H38 O2 N1	288.29	0.529473	0.0165464	2.82857	6429292956	6614851289	7127587385	4472003116	2797056310	5282963241	3771699256	4120738528	3799031484	3620386816	9.07525e+08	1106978954	Down
1059POS	Y	TG(18:4/18:2/18:2)+NH4	TG(54:8)+NH4	TG	(18:4/18:2/18:2)	(18:4)	(18:2)	(18:2)	C57 H98 O6 N1	892.739	34.0724	0.00145494	2.8223	8.18517e+07	3.64429e+08	1.87329e+07	3.56686e+07	2.28076e+07	3.7757e+07	3287392615	1078181210	3632110446	3085863087	1890746848	6148730639	Up
1060POS	Y	TG(16:1/18:2/20:5)+NH4	TG(54:8)+NH4	TG	(16:1/18:2/20:5)	(16:1)	(18:2)	(20:5)	C57 H98 O6 N1	892.739	45.9823	0.00060879	2.783	1.46888e+08	2.01441e+07	5.58978e+07	2.94663e+07	4.40687e+07	8.40865e+07	5178769613	1203232635	3277039084	2024463376	2160609865	3654516040	Up
988POS	Y	TG(18:4/16:0/18:1)+NH4	TG(52:5)+NH4	TG	(18:4/16:0/18:1)	(18:4)	(16:0)	(18:1)	C55 H100 O6 N1	870.755	2.94373	0.0022996	2.74509	2544963994	1747007084	1303381485	2648710151	1004297046	1484518528	8503978572	2689445441	4945672312	5239036962	3988455455	6228082167	Up
1704NEG	Y	PE(18:0/18:2)-H	PE(36:2)-H	PE	(18:0/18:2)	(18:0)	(18:2)		C41 H77 O8 N1 P1	742.539	0.585647	0.00309515	2.6978	7.58579e+08	9.52246e+08	7.58074e+08	5.48637e+08	775504151	5.81105e+08	2.62608e+08	4.3245e+08	5.52534e+08	5.78705e+08	3.40035e+08	3.95376e+08	Down
1876NEG	Y	PI(18:0/16:1)-H	PI(34:1)-H	PI	(18:0/16:1)	(18:0)	(16:1)		C43 H80 O13 N0 P1	835.534	2.05084	0.00351648	2.63366	8.92891e+07	1.66969e+08	1.65382e+08	7.61542e+07	2.15668e+08	1.01782e+08	1.9911e+08	2.75107e+08	3.59672e+08	3.76728e+08	2.19688e+08	2.41629e+08	Up
878POS	Y	TG(16:0/16:0/17:1)+NH4	TG(49:1)+NH4	TG	(16:0/16:0/17:1)	(16:0)	(16:0)	(17:1)	C52 H102 O6 N1	836.77	4.63129	0.00105646	2.62514	1013268157	7.78319e+08	8.50351e+08	371197768	6.94118e+08	7.08088e+08	4152438307	1303152980	4067840876	3659984254	2127511391	5137786336	Up
1192POS	Y	TG(18:1/18:2/22:4)+NH4	TG(58:7)+NH4	TG	(18:1/18:2/22:4)	(18:1)	(18:2)	(22:4)	C61 H108 O6 N1	950.817	2.95748	0.0014886	2.59987	2272018619	1570028236	1054590848	6.33137e+08	1047179447	1423879562	5485755133	1812920014	4983675132	3608238753	3115842961	4655863306	Up
959POS	Y	TG(16:1/17:1/18:1)+NH4	TG(51:3)+NH4	TG	(16:1/17:1/18:1)	(16:1)	(17:1)	(18:1)	C54 H102 O6 N1	860.77	1.89999	0.01695	2.56994	5266039236	3605766563	4029922310	1845008736	2953888159	3899081604	9037976540	3347009159	9359321943	6114915046	4600526365	8579383020	Up
1153POS	Y	TG(20:1/18:1/18:1)+NH4	TG(56:3)+NH4	TG	(20:1/18:1/18:1)	(20:1)	(18:1)	(18:1)	C59 H112 O6 N1	930.848	2.47917	0.0037103	2.53368	1506189323	2156263054	2418977090	1598203503	2044085037	2499103820	8714726791	4482490908	5549984900	4030673887	3617638328	3906961196	Up
1771NEG	Y	PE(18:1p/22:6)-H	PE(40:7p)-H	PE	(18:1p/22:6)	(18:1p)	(22:6)		C45 H75 O7 N1 P1	772.529	2.56161	0.000486563	2.53277	6.31458e+07	1.64516e+08	7.91999e+07	7.61642e+07	1.19978e+08	7.03318e+07	2.73975e+08	298101602	262080189	2.92934e+08	1.47694e+08	1.93877e+08	Up
1777NEG	Y	PE(18:0p/22:6)-H	PE(40:6p)-H	PE	(18:0p/22:6)	(18:0p)	(22:6)		C45 H77 O7 N1 P1	774.544	1.76521	0.0124782	2.5091	1.34967e+08	2.82028e+08	1.40834e+08	119708693	1.79796e+08	1.39001e+08	2.43049e+08	2.70868e+08	3.20316e+08	4.18144e+08	176517211	3.29848e+08	Up
1087POS	Y	TG(18:1/18:2/18:3)+Na	TG(54:6)+Na	TG	(18:1/18:2/18:3)	(18:1)	(18:2)	(18:3)	C57 H98 O6 Na1	901.726	0.144082	1.07054e-05	2.49449	2776076685	1998297396	2401284977	1202063827	2296740237	2662947396	2.54693e+08	3.32575e+08	3.625e+08	3.21373e+08	2.14239e+08	4.36295e+08	Down
894POS	Y	TG(18:4/16:1/16:1)+NH4	TG(50:6)+NH4	TG	(18:4/16:1/16:1)	(18:4)	(16:1)	(16:1)	C53 H94 O6 N1	840.708	12.3255	0.000434614	2.45048	5.06902e+08	4.31521e+08	6.632e+07	4.08671e+07	4.17231e+07	7.70083e+07	3476841118	7.17205e+08	2203524999	3227146098	1849921947	2876511375	Up
1807NEG	Y	PE(18:0/22:5)-H	PE(40:5)-H	PE	(18:0/22:5)	(18:0)	(22:5)		C45 H79 O8 N1 P1	792.555	6.19133	5.43307e-05	2.43095	1.89891e+07	4.55759e+07	1.93859e+07	1.93491e+07	3.32142e+07	2.13342e+07	1.28202e+08	1.67797e+08	1.65809e+08	251787329	1.11304e+08	1.52394e+08	Up
869POS	Y	TG(16:0/16:1/17:1)+NH4	TG(49:2)+NH4	TG	(16:0/16:1/17:1)	(16:0)	(16:1)	(17:1)	C52 H100 O6 N1	834.755	2.74401	0.00667449	2.3839	1820997900	1722608345	1766546541	6.3005e+08	1078378336	1792419417	4744615353	2229408951	5483189378	2776412544	2487971494	6455912933	Up
1934NEG	Y	PI(18:0/20:5)-H	PI(38:5)-H	PI	(18:0/20:5)	(18:0)	(20:5)		C47 H80 O13 N0 P1	883.534	9.85588	7.71317e-06	2.38191	1.3395e+07	1.78156e+07	1.80397e+07	7.11378e+06	18644960	1.09766e+07	8.54148e+07	1.39702e+08	1.64944e+08	1.93025e+08	1.21613e+08	1.42763e+08	Up
1954NEG	Y	PI(18:0/22:6)-H	PI(40:6)-H	PI	(18:0/22:6)	(18:0)	(22:6)		C49 H82 O13 N0 P1	909.55	7.22747	0.000139726	2.3527	1.53245e+07	2.87362e+07	2.14704e+07	9.421e+06	2.91485e+07	1.66785e+07	1.3983e+08	9.09935e+07	1.51636e+08	2.24218e+08	9.17119e+07	1.74539e+08	Up
982POS	Y	TG(16:0/14:0/22:6)+NH4	TG(52:6)+NH4	TG	(16:0/14:0/22:6)	(16:0)	(14:0)	(22:6)	C55 H98 O6 N1	868.739	35.5179	0.000148217	2.26553	7.2155e+07	1.0314e+08	3.51911e+07	3.12853e+07	3.03555e+07	4.14473e+07	1694287068	6.10386e+08	2315929190	2176709135	1579494713	2760689902	Up
1186POS	Y	TG(22:4/18:2/18:2)+NH4	TG(58:8)+NH4	TG	(22:4/18:2/18:2)	(22:4)	(18:2)	(18:2)	C61 H106 O6 N1	948.801	4.0704	0.00116842	2.19603	1002530190	834384304	4.66279e+08	2.2613e+08	3.83235e+08	6.89835e+08	3636954195	9.88616e+08	3310128623	2011960593	2089643587	2625874516	Up
725POS	Y	TG(16:0/14:0/16:1)+NH4	TG(46:1)+NH4	TG	(16:0/14:0/16:1)	(16:0)	(14:0)	(16:1)	C49 H96 O6 N1	794.723	2.19693	0.0186415	2.19355	1594346693	4196425810	1502673925	9.48328e+08	1239778901	1565070707	3315865351	1998677326	4145714123	5186674014	3335110300	6286595786	Up
973POS	Y	TG(16:0/17:0/18:1)+NH4	TG(51:1)+NH4	TG	(16:0/17:0/18:1)	(16:0)	(17:0)	(18:1)	C54 H106 O6 N1	864.801	5.14707	7.28402e-05	2.19067	4.69657e+08	2.88973e+08	8.20872e+08	1.72241e+08	3.87749e+08	3.75074e+08	2911431012	1276233420	2126548694	2331310788	1622974578	2674163466	Up
1067POS	Y	TG(18:3/18:2/18:2)+NH4	TG(54:7)+NH4	TG	(18:3/18:2/18:2)	(18:3)	(18:2)	(18:2)	C57 H100 O6 N1	894.755	2.27749	0.0252845	2.18006	2844078253	3157664062	1108815104	8.32912e+08	1082076828	1819182047	7019523876	1700029920	4444953135	3410919703	2751484536	5371815620	Up
1714NEG	Y	PE(18:1p/20:5)-H	PE(38:6p)-H	PE	(18:1p/20:5)	(18:1p)	(20:5)		C43 H73 O7 N1 P1	746.513	0.517305	0.00107901	2.1639	4.52627e+08	5.14755e+08	3.66364e+08	3.63857e+08	360212796	2.77925e+08	2.15562e+08	2.9373e+08	2.25404e+08	1.95915e+08	1.31118e+08	1.46561e+08	Down
977POS	Y	TG(18:4/16:1/18:2)+NH4	TG(52:7)+NH4	TG	(18:4/16:1/18:2)	(18:4)	(16:1)	(18:2)	C55 H96 O6 N1	866.723	7.52938	0.0222953	2.11174	6.83958e+08	4.84421e+08	253599395	1.13771e+08	1.49219e+08	2.87954e+08	4881033209	8.49285e+08	1762102643	1349729466	1011923668	5000790185	Up
978POS	Y	TG(16:1/14:0/22:6)+NH4	TG(52:7)+NH4	TG	(16:1/14:0/22:6)	(16:1)	(14:0)	(22:6)	C55 H96 O6 N1	866.723	17.018	0.000691727	2.10975	2.06145e+08	2.21797e+08	2.42284e+07	4.03734e+07	4.58335e+07	7.42922e+07	1889986807	3.98199e+08	2098767225	1650045241	1477747719	2911643602	Up
1955NEG	Y	PI(18:0/22:5)-H	PI(40:5)-H	PI	(18:0/22:5)	(18:0)	(22:5)		C49 H84 O13 N0 P1	911.566	8.44786	1.17575e-05	2.10587	1.47652e+07	2.07611e+07	1.40554e+07	5.39323e+06	1.70002e+07	1.02506e+07	1.39469e+08	1.02364e+08	1.23802e+08	1.54411e+08	6.70701e+07	1.07516e+08	Up
1785NEG	Y	PE(40:4p)-H	PE(40:4p)-H	PE	(40:4p)	(40:4p)			C45 H81 O7 N1 P1	778.576	0.0771564	3.62859e-07	2.08332	1.14007e+08	1.6709e+08	1.34784e+08	9.86874e+07	1.55712e+08	1.29004e+08	8.00138e+06	1.13445e+07	9.7591e+06	1.61694e+07	5.70216e+06	1.06934e+07	Down
1126POS	Y	TG(16:1/18:2/22:6)+NH4	TG(56:9)+NH4	TG	(16:1/18:2/22:6)	(16:1)	(18:2)	(22:6)	C59 H100 O6 N1	918.755	23.8673	0.00492923	2.06347	1.41392e+08	145138285	4.195e+07	2.44114e+07	3.59912e+07	6.59168e+07	3845384564	5.71201e+08	2093701580	995875132	1163663164	2185030032	Up
867POS	Y	PC(38:3)+Na	PC(38:3)+Na	PC	(38:3)	(38:3)			C46 H86 O8 N1 P1 Na1	834.598	4.48533	0.000737769	2.03148	2.88078e+08	8.67173e+08	4.49891e+08	4.25914e+08	6.34147e+08	4.09653e+08	2941090210	1561926813	2209582333	3529799560	1090848856	2458509588	Up
1747NEG	Y	PE(16:0/22:5)-H	PE(38:5)-H	PE	(16:0/22:5)	(16:0)	(22:5)		C43 H75 O8 N1 P1	764.524	1.54654	0.0151745	2.00961	9.34346e+07	1.38454e+08	1.63727e+08	1.20567e+08	2.40445e+08	1.63687e+08	2.22118e+08	2.54008e+08	2.48435e+08	3.1767e+08	1.74848e+08	2.06225e+08	Up
776POS	Y	PC(38:4)+H	PC(38:4)+H	PC	(16:0/22:4)	(16:0)	(22:4)		C46 H85 O8 N1 P1	810.601	0.171828	8.54059e-06	2.0062	1182542543	1815702632	1468554601	1070535066	1838985687	1152164214	2.65749e+08	2.51489e+08	263794961	3.3194e+08	1.51024e+08	2.01434e+08	Down
312POS	Y	DG(18:2/18:2)+NH4	DG(36:4)+NH4	DG	(18:2/18:2)	(18:2)	(18:2)		C39 H72 O5 N1	634.541	0.205585	0.014462	2.00135	4104823577	3428341773	1897800994	9.36625e+08	1360999655	8.13506e+08	5.67697e+08	2.87307e+08	5.26212e+08	3.15691e+08	2.87849e+08	5.93706e+08	Down
1170POS	Y	TG(18:3/18:2/22:6)+NH4	TG(58:11)+NH4	TG	(18:3/18:2/22:6)	(18:3)	(18:2)	(22:6)	C61 H100 O6 N1	942.755	115.721	0.00115758	1.95101	1.7179e+07	3.4055e+07	4.56639e+06	5.2235e+06	5.64783e+06	7.84849e+06	2824863130	5.74767e+08	1586714980	9.67735e+08	1128887303	1540602167	Up
537POS	Y	PC(32:1)+H	PC(32:1)+H	PC	(32:1)	(32:1)			C40 H79 O8 N1 P1	732.554	2.26222	0.000758785	1.9478	1733336776	1667957713	1525564285	1266082682	1448842952	1335271150	2289861802	3414874357	2491018832	4792607055	3209395377	4110335458	Up
1925NEG	Y	PC(18:1/22:6)+HCOO	PC(40:7)+HCOO	PC	(18:1/22:6)	(18:1)	(22:6)		C49 H83 O10 N1 P1	876.576	2.92183	3.13007e-05	1.8412	2.88636e+07	42107945	4.76703e+07	4.0758e+07	3.79384e+07	4.03767e+07	1.48867e+08	1.22441e+08	1.16622e+08	1.26783e+08	7.23275e+07	1.07521e+08	Up
902POS	Y	TG(16:1/14:0/20:4)+NH4	TG(50:5)+NH4	TG	(16:1/14:0/20:4)	(16:1)	(14:0)	(20:4)	C53 H96 O6 N1	842.723	7.64575	0.0240464	1.78265	3.00485e+08	6.96138e+08	1.03791e+08	7.12667e+07	1.2869e+08	1.65531e+08	2250794983	2.88976e+08	1004941173	2800128847	693361500	4169714969	Up
1103POS	Y	TG(18:2/17:1/20:4)+NH4	TG(55:7)+NH4	TG	(18:2/17:1/20:4)	(18:2)	(17:1)	(20:4)	C58 H102 O6 N1	908.77	19.1281	1.27012e-07	1.77889	9.86021e+07	6.53069e+07	4.52733e+07	2.97494e+07	4.57476e+07	7.96559e+07	1454059303	9.06115e+08	1087843464	1000256712	1317901867	1202875615	Up
1692NEG	Y	PE(16:0/20:4)-H	PE(36:4)-H	PE	(16:0/20:4)	(16:0)	(20:4)		C41 H73 O8 N1 P1	738.508	0.50796	0.00080989	1.76816	2.43108e+08	3.34682e+08	232240228	1.82297e+08	2.48167e+08	1.91052e+08	1.09186e+08	124642176	143728503	1.5393e+08	7.69153e+07	1.18768e+08	Down
1208POS	Y	TG(18:1/20:5/22:6)+NH4	TG(60:12)+NH4	TG	(18:1/20:5/22:6)	(18:1)	(20:5)	(22:6)	C63 H102 O6 N1	968.77	74.022	0.000818613	1.73512	2.57512e+07	3.72501e+07	4.72166e+06	6.10128e+06	6.19962e+06	8.86061e+06	4.57523e+08	491133235	1935472469	1074572309	1362577399	1258132548	Up
1121POS	Y	TG(19:1/18:1/18:1)+NH4	TG(55:3)+NH4	TG	(19:1/18:1/18:1)	(19:1)	(18:1)	(18:1)	C58 H110 O6 N1	916.833	2.32499	0.0131833	1.71613	1173178450	7.1777e+08	1689378346	6.33058e+08	1125262217	1019518132	4525042817	2402450753	1826434153	1962545832	1510871505	2555354799	Up
679POS	Y	PC(36:4)+H	PC(36:4)+H	PC	(18:2/18:2)	(18:2)	(18:2)		C44 H81 O8 N1 P1	782.569	0.532574	0.000997118	1.7066	1859960599	1832456520	1626271256	1212963719	2001799255	1479180907	5.90664e+08	7.98239e+08	1152931690	1090049282	506218028	1194364315	Down
1209POS	Y	TG(22:5/18:2/20:4)+NH4	TG(60:11)+NH4	TG	(22:5/18:2/20:4)	(22:5)	(18:2)	(20:4)	C63 H104 O6 N1	970.786	34.0211	7.45774e-05	1.66812	4.66874e+07	4.35325e+07	2.13821e+07	9.44972e+06	2.7962e+07	2.86331e+07	1249516894	3.13574e+08	1365432538	1082470733	9.24678e+08	1108068475	Up
629POS	Y	PE(18:0/20:4)+H	PE(38:4)+H	PE	(18:0/20:4)	(18:0)	(20:4)		C43 H79 O8 N1 P1	768.554	0.467435	0.00164988	1.66283	1363019503	2214887354	1509502143	1117110432	1731086611	1155836867	6.41245e+08	8.04688e+08	7.69316e+08	1025838693	3.91616e+08	616956917	Down
1110POS	Y	TG(16:0/17:0/22:6)+NH4	TG(55:6)+NH4	TG	(16:0/17:0/22:6)	(16:0)	(17:0)	(22:6)	C58 H104 O6 N1	910.786	19.09	3.98104e-06	1.65337	8.92801e+07	6.70072e+07	1.46156e+07	3.50968e+07	5.39688e+07	5.09803e+07	1112408441	5.12103e+08	1203750816	1034473809	9.26968e+08	1146297187	Up
1744NEG	Y	PE(18:2/20:4)-H	PE(38:6)-H	PE	(18:2/20:4)	(18:2)	(20:4)		C43 H73 O8 N1 P1	762.508	2.97781	0.000821957	1.64229	3.46905e+07	49779401	2.14364e+07	1.98583e+07	5.031e+07	1.59801e+07	1.35804e+08	1.16623e+08	9.40744e+07	9.79867e+07	5.55566e+07	7.18587e+07	Up
1156POS	Y	TG(18:0/18:1/20:1)+NH4	TG(56:2)+NH4	TG	(18:0/18:1/20:1)	(18:0)	(18:1)	(20:1)	C59 H114 O6 N1	932.864	2.65955	0.00327403	1.6349	5.3716e+08	8.17618e+08	8.67597e+08	4.831e+08	703876155	8.35239e+08	3110592146	1285153413	2123219080	1582219084	1097117577	2090405297	Up
914POS	Y	TG(18:4/16:0/16:0)+NH4	TG(50:4)+NH4	TG	(18:4/16:0/16:0)	(18:4)	(16:0)	(16:0)	C53 H98 O6 N1	844.739	3.71562	0.00019234	1.61831	712802310	3.63207e+08	3.02653e+08	1.6612e+08	242649648	2.92689e+08	1638799538	7.64923e+08	1258292103	1254148942	1087993683	1724792071	Up
1371NEG	Y	LPC(18:2)+HCOO	LPC(18:2)+HCOO	LPC	(18:2)	(18:2)			C27 H51 O9 N1 P1	564.331	0.56646	0.0166063	1.61358	2.57787e+08	2.4966e+08	2.62472e+08	2.30184e+08	2.39922e+08	1.56377e+08	7.84091e+07	1.00176e+08	182276773	2.65914e+08	7.9518e+07	8.47107e+07	Down
1751NEG	Y	PE(16:0/22:4)-H	PE(38:4)-H	PE	(16:0/22:4)	(16:0)	(22:4)		C43 H77 O8 N1 P1	766.539	0.210503	5.87277e-05	1.6123	8.49482e+07	1.56067e+08	1.03089e+08	7.46018e+07	104224987	8.56364e+07	1.58367e+07	2.63893e+07	2.63204e+07	2.53997e+07	1.48759e+07	1.92837e+07	Down
1863NEG	Y	PC(16:0/20:4)+HCOO	PC(36:4)+HCOO	PC	(16:0/20:4)	(16:0)	(20:4)		C45 H81 O10 N1 P1	826.56	0.517256	2.96596e-05	1.60179	2.36989e+08	2.36889e+08	2.31839e+08	1.8748e+08	2.69738e+08	2.25132e+08	8.02249e+07	1.15529e+08	1.63245e+08	1.30799e+08	1.20551e+08	1.07637e+08	Down
1143POS	Y	TG(18:0/16:0/22:6)+NH4	TG(56:6)+NH4	TG	(18:0/16:0/22:6)	(18:0)	(16:0)	(22:6)	C59 H106 O6 N1	924.801	13.3801	0.000500834	1.5911	114336551	9.67586e+07	6.48552e+07	5.41735e+07	5.19198e+07	7.50463e+07	1368173072	2.35507e+08	1204325288	1219855570	703092107	1384948610	Up
1104POS	Y	TG(15:0/18:1/22:6)+NH4	TG(55:7)+NH4	TG	(15:0/18:1/22:6)	(15:0)	(18:1)	(22:6)	C58 H102 O6 N1	908.77	25.9492	8.63694e-05	1.55302	6.32145e+07	6.06984e+07	3.00205e+07	1.11181e+07	1.66918e+07	2.33609e+07	1208571772	3.17939e+08	1170285077	7.72883e+08	8.2752e+08	1025097799	Up
987POS	Y	TG(16:1/16:1/20:3)+NH4	TG(52:5)+NH4	TG	(16:1/16:1/20:3)	(16:1)	(16:1)	(20:3)	C55 H100 O6 N1	870.755	6.39838	5.95362e-05	1.53467	1.9502e+08	235786004	7.73046e+07	6.13086e+07	2.94023e+08	1.70218e+08	1100294834	1277360427	8.71648e+08	6.49342e+08	1099993384	1615110199	Up
861POS	Y	PC(40:7)+H	PC(40:7)+H	PC	(40:7)	(40:7)			C48 H83 O8 N1 P1	832.585	3.72785	0.000162009	1.53289	3.00946e+08	5.50812e+08	3.44396e+08	3.69347e+08	6.44158e+08	1.89121e+08	1972203255	1584958579	1479089366	1816094183	763448823	1326489931	Up
1443NEG	Y	LPC(22:6)+HCOO	LPC(22:6)+HCOO	LPC	(22:6)	(22:6)			C31 H51 O9 N1 P1	612.331	5.09949	0.00695717	1.51755	7.8592e+06	2.92937e+07	1.19184e+07	1.53917e+07	1.78011e+07	7.10391e+06	7.99018e+07	3.95756e+07	8.77013e+07	1.52417e+08	3.14185e+07	6.4718e+07	Up
1803NEG	Y	PC(17:1/16:0)+HCOO	PC(33:1)+HCOO	PC	(17:1/16:0)	(17:1)	(16:0)		C42 H81 O10 N1 P1	790.56	1.5246	0.0130077	1.50904	4.216e+07	7.76945e+07	1.0135e+08	8.75295e+07	1.23135e+08	7.39683e+07	1.06159e+08	126330379	1.53013e+08	1.6125e+08	1.14785e+08	1.09661e+08	Up
515POS	Y	PE(16:0p/20:4)+H	PE(36:4p)+H	PE	(16:0p/20:4)	(16:0p)	(20:4)		C41 H75 O7 N1 P1	724.528	0.462026	0.000955546	1.50564	1120167208	1666375383	1261811170	942466635	1398523795	8.29446e+08	4.85074e+08	5.81006e+08	6.27316e+08	7.97233e+08	337671384	5.06972e+08	Down
895POS	Y	TG(18:2/14:2/18:2)+NH4	TG(50:6)+NH4	TG	(18:2/14:2/18:2)	(18:2)	(14:2)	(18:2)	C53 H94 O6 N1	840.708	18.2553	0.00409594	1.47795	5.26547e+07	9.99697e+07	4.7144e+07	3.32376e+07	3.94981e+07	6.33579e+07	1793803573	201820160	1398727653	9.89562e+08	3.33209e+08	1414150602	Up
1119POS	Y	TG(18:3/18:2/20:5)+NH4	TG(56:10)+NH4	TG	(18:3/18:2/20:5)	(18:3)	(18:2)	(20:5)	C59 H98 O6 N1	916.739	168.342	0.00440943	1.46659	7.48412e+06	1.62963e+07	1.95974e+06	2.06092e+06	1.93984e+06	3.3196e+06	1876238295	2.73012e+08	1190994623	6.66255e+08	3.3402e+08	1224963968	Up
614POS	Y	PE(16:0/20:3)+Na	PE(36:3)+Na	PE	(16:0/20:3)	(16:0)	(20:3)		C41 H76 O8 N1 P1 Na1	764.52	3.3695	3.96864e-05	1.46023	3.44207e+08	4.45218e+08	2.77435e+08	3.21329e+08	3.5826e+08	325160840	1509039589	832291042	1120338093	1332392028	8.37083e+08	1349144703	Up
1592NEG	Y	Cer(d18:1/24:2)+HCOO	Cer(d42:3)+HCOO	Cer	(d18:1/24:2)	(d18:1)	(24:2)		C43 H80 O5 N1	690.604	0.51143	0.00133906	1.44175	1.53776e+08	2.26415e+08	1.51594e+08	1.34666e+08	1.76372e+08	1.21237e+08	5.4924e+07	87817098	1.0222e+08	9.75497e+07	5.16077e+07	9.89307e+07	Down
1404NEG	Y	LPC(20:4)+HCOO	LPC(20:4)+HCOO	LPC	(20:4)	(20:4)			C29 H51 O9 N1 P1	588.331	0.347616	0.00157541	1.431	8.56599e+07	1.56399e+08	9.88872e+07	1.07201e+08	1.17352e+08	5.21204e+07	2.9857e+07	3.11981e+07	4.6557e+07	6.34458e+07	1.81173e+07	2.55193e+07	Down
711POS	Y	PE(18:0/20:3)+Na	PE(38:3)+Na	PE	(18:0/20:3)	(18:0)	(20:3)		C43 H80 O8 N1 P1 Na1	792.551	3.29865	0.00162854	1.41689	2.59786e+08	5.17611e+08	3.66891e+08	3.66155e+08	5.51307e+08	3.39903e+08	1601194227	8.13985e+08	1267503662	2083505125	6.96819e+08	1459198477	Up
930POS	Y	TG(18:0/16:0/16:0)+NH4	TG(50:0)+NH4	TG	(18:0/16:0/16:0)	(18:0)	(16:0)	(16:0)	C53 H106 O6 N1	852.801	4.66226	0.00672545	1.41223	3.7979e+08	2.79664e+08	4.26661e+08	1.5274e+08	5.5659e+07	9.82043e+07	1387408743	8.79416e+07	995239470	1479095685	8.05403e+08	1738127511	Up
1120POS	Y	TG(16:0/20:5/20:5)+NH4	TG(56:10)+NH4	TG	(16:0/20:5/20:5)	(16:0)	(20:5)	(20:5)	C59 H98 O6 N1	916.739	98.0107	0.00117328	1.40774	8.96332e+06	2.06473e+07	4.00064e+06	2.62759e+06	3.78806e+06	6.3476e+06	1460462378	2.57745e+08	8.90116e+08	5.94915e+08	5.36743e+08	8.05212e+08	Up
227POS	Y	WE(20:1/20:0)+H	WE(40:1)+H	WE	(20:1/20:0)	(20:1)	(20:0)		H79 C40 O2	591.607	0.615908	0.00575052	1.39674	1477502472	1276634607	1802725471	1114306531	1406860213	9.95412e+08	8.18778e+08	7.64519e+08	9.95556e+08	7.86441e+08	4.80357e+08	1126844779	Down
1198POS	Y	TG(20:1/18:1/20:1)+NH4	TG(58:3)+NH4	TG	(20:1/18:1/20:1)	(20:1)	(18:1)	(20:1)	C61 H116 O6 N1	958.88	3.05529	0.00250295	1.38533	2.40879e+08	5.57692e+08	5.50221e+08	3.59288e+08	4.82354e+08	3.67015e+08	2210220885	9.88176e+08	1550427120	1106916019	7.27668e+08	1230340134	Up
1748NEG	Y	PE(16:0/22:5)-H	PE(38:5)-H	PE	(16:0/22:5)	(16:0)	(22:5)		C43 H75 O8 N1 P1	764.524	0.65253	0.00411361	1.3757	1.72936e+08	281307082	2.35939e+08	1.94776e+08	2.50241e+08	2.36344e+08	1.44386e+08	170000180	1.61288e+08	1.97072e+08	9.63965e+07	1.2583e+08	Down
1784NEG	Y	PE(40:4p)-H	PE(40:4p)-H	PE	(40:4p)	(40:4p)			C45 H81 O7 N1 P1	778.576	0.295376	5.97389e-05	1.37562	6.15914e+07	1.0563e+08	9.29527e+07	5.81533e+07	1.0038e+08	8.10346e+07	1.82533e+07	3.79126e+07	2.99258e+07	2.45877e+07	1.35247e+07	2.34075e+07	Down
1164POS	Y	TG(19:1/18:2/20:4)+NH4	TG(57:7)+NH4	TG	(19:1/18:2/20:4)	(19:1)	(18:2)	(20:4)	C60 H106 O6 N1	936.801	25.6655	3.01882e-05	1.36744	3.13724e+07	4.01624e+07	2.21197e+07	1.66138e+07	2.67591e+07	2.28847e+07	1050533311	5.08637e+08	6.36043e+08	5.77212e+08	4.7599e+08	8.5581e+08	Up
1100POS	Y	TG(20:0/16:0/18:1)+NH4	TG(54:1)+NH4	TG	(20:0/16:0/18:1)	(20:0)	(16:0)	(18:1)	C57 H112 O6 N1	906.848	2.85167	0.00314011	1.36372	5.08524e+08	4.42719e+08	5.04947e+08	2.73246e+08	4.1449e+08	3.70911e+08	1839775772	5.83123e+08	1302238198	1146739282	7.23917e+08	1575691016	Up
772POS	Y	TG(15:0/16:0/16:1)+NH4	TG(47:1)+NH4	TG	(15:0/16:0/16:1)	(15:0)	(16:0)	(16:1)	C50 H98 O6 N1	808.739	4.15905	0.000367909	1.35467	2.56758e+08	2.62594e+08	2.04469e+08	1.46106e+08	1.92179e+08	2.17441e+08	7.47066e+08	4.09802e+08	931955106	1104385390	8.15963e+08	1312523599	Up
1334NEG	Y	LPE(22:6)-H	LPE(22:6)-H	LPE	(22:6)	(22:6)			C27 H43 O7 N1 P1	524.278	3.37001	0.00503192	1.33812	1.43027e+07	3.60257e+07	1.46666e+07	1.65595e+07	1.89077e+07	6.84129e+06	5.48034e+07	4.08525e+07	7.26773e+07	1.08938e+08	3.35321e+07	5.08108e+07	Up
634POS	Y	TG(16:0/14:0/14:0)+NH4	TG(44:0)+NH4	TG	(16:0/14:0/14:0)	(16:0)	(14:0)	(14:0)	C47 H94 O6 N1	768.708	13.11	0.00133225	1.33299	2.20557e+07	3.18583e+07	1.61014e+07	9.63403e+07	1.55532e+08	1.12079e+07	5.14019e+08	2.17031e+08	8.19168e+08	1097981611	5.45888e+08	1172809996	Up
863POS	Y	TG(16:1/16:1/17:1)+NH4	TG(49:3)+NH4	TG	(16:1/16:1/17:1)	(16:1)	(16:1)	(17:1)	C52 H98 O6 N1	832.739	1.85469	0.00147622	1.30855	1355742814	1007147544	8.04019e+08	5.22788e+08	7.06267e+08	1031842748	1582696654	1137462502	1797167519	1604598275	1841610353	2103364391	Up
805POS	Y	TG(16:0/14:2/18:2)+NH4	TG(48:4)+NH4	TG	(16:0/14:2/18:2)	(16:0)	(14:2)	(18:2)	C51 H94 O6 N1	816.708	6.44093	0.00101031	1.30465	2.1968e+08	1.87677e+08	7.87685e+07	4.5121e+07	6.88621e+07	9.0288e+07	5.14322e+08	313839299	7.9382e+08	9.87493e+08	623006588	1214313792	Up
1025POS	Y	TG(18:3/17:1/18:2)+NH4	TG(53:6)+NH4	TG	(18:3/17:1/18:2)	(18:3)	(17:1)	(18:2)	C56 H100 O6 N1	882.755	11.3334	4.35547e-05	1.27046	9.54904e+07	6.36614e+07	6.68858e+07	3.68147e+07	3.91864e+07	3.05463e+07	7.9509e+08	3.12441e+08	706405273	7.37346e+08	4.36911e+08	7.81135e+08	Up
754POS	Y	PC(38:7)+H	PC(38:7)+H	PC	(38:7)	(38:7)			C46 H79 O8 N1 P1	804.554	0.436905	6.51049e-07	1.26568	917559900	7.04189e+08	7.81256e+08	8.11845e+08	7.56747e+08	8.69035e+08	4.44733e+08	3.74903e+08	3.01623e+08	2.88829e+08	2.99837e+08	4.04972e+08	Down
1778NEG	Y	PE(18:1p/22:5)-H	PE(40:6p)-H	PE	(18:1p/22:5)	(18:1p)	(22:5)		C45 H77 O7 N1 P1	774.544	2.36663	0.0104467	1.21711	3.28631e+07	4.02424e+07	3.60203e+07	1.86039e+07	2.20403e+07	1.61244e+07	3.90299e+07	8.82976e+07	1.02927e+08	7.73503e+07	3.99337e+07	4.50718e+07	Up
581POS	Y	PE(18:0p/20:4)+H	PE(38:4p)+H	PE	(18:0p/20:4)	(18:0p)	(20:4)		C43 H79 O7 N1 P1	752.559	0.351941	0.000149016	1.21039	5.13554e+08	8.54054e+08	6.69666e+08	5.0193e+08	8.24529e+08	5.2655e+08	2.03371e+08	2.6687e+08	2.50335e+08	3.229e+08	1.22362e+08	2.03311e+08	Down
633POS	Y	PC(36:4e)+H	PC(36:4e)+H	PC	(36:4e)	(36:4e)			C44 H83 O7 N1 P1	768.59	0.442929	0.01113	1.19801	7.09132e+08	1410817459	7.22681e+08	6.39104e+08	9.21683e+08	4.65243e+08	3.13229e+08	3.13296e+08	355930794	6.12965e+08	1.94021e+08	3.6703e+08	Down
423POS	Y	DG(18:1/22:6)+NH4	DG(40:7)+NH4	DG	(18:1/22:6)	(18:1)	(22:6)		C43 H74 O5 N1	684.556	14.8385	2.07136e-06	1.18151	6.0175e+07	9.21641e+07	1.61536e+07	14393125	2.01805e+07	8.34297e+06	6.06503e+08	3.64956e+08	6.89732e+08	549173074	4.28616e+08	4.98025e+08	Up
1780NEG	Y	PE(20:0p/20:5)-H	PE(40:5p)-H	PE	(20:0p/20:5)	(20:0p)	(20:5)		C45 H79 O7 N1 P1	776.56	0.399136	0.000761305	1.17862	4.83832e+07	7.0759e+07	9.27107e+07	6.13982e+07	1.08564e+08	8.23916e+07	2.05929e+07	3.7955e+07	3.56306e+07	4.27364e+07	1.81621e+07	3.02045e+07	Down
1077POS	Y	TG(16:1/18:2/20:5)+Na	TG(54:8)+Na	TG	(16:1/18:2/20:5)	(16:1)	(18:2)	(20:5)	C57 H94 O6 Na1	897.694	14.1314	4.26381e-07	1.16143	5.29273e+07	5.15103e+07	2.89168e+07	2.00023e+07	2.45525e+07	3.55787e+07	6.47266e+08	3.91564e+08	5.19023e+08	3.99728e+08	4.92487e+08	5.66812e+08	Up
783POS	Y	PS(18:0/18:1)+Na	PS(36:1)+Na	PS	(18:0/18:1)	(18:0)	(18:1)		C42 H80 O10 N1 P1 Na1	812.541	0.256027	0.000174621	1.16099	4.64429e+08	8.632e+08	5.8302e+08	3.6479e+08	5.84141e+08	468679024	9.94648e+07	1.80478e+08	1.55067e+08	1.51376e+08	126453352	1.39286e+08	Down
1026POS	Y	TG(15:0/16:0/22:6)+NH4	TG(53:6)+NH4	TG	(15:0/16:0/22:6)	(15:0)	(16:0)	(22:6)	C56 H100 O6 N1	882.755	26.6405	1.76624e-05	1.15382	4.14542e+07	23646991	1.26011e+07	9.11926e+06	1.18369e+07	8.3832e+06	4.64745e+08	203623120	6.11141e+08	5.67914e+08	4.54945e+08	5.49274e+08	Up
623POS	Y	PC(36:4p)+H	PC(36:4p)+H	PC	(36:4p)	(36:4p)			C44 H81 O7 N1 P1	766.575	0.346413	0.000185505	1.14891	5.55487e+08	7.71666e+08	6.0951e+08	5.23365e+08	6.89394e+08	3.37003e+08	1.83969e+08	1.90757e+08	2.40802e+08	2.88646e+08	1.07029e+08	1.96539e+08	Down
1128POS	Y	TG(19:0/18:1/18:1)+NH4	TG(55:2)+NH4	TG	(19:0/18:1/18:1)	(19:0)	(18:1)	(18:1)	C58 H112 O6 N1	918.848	2.95589	0.0116857	1.14799	335947172	2.53733e+08	3.90453e+08	2.30396e+08	3.0315e+08	3.24107e+08	1803602963	535405612	9.18462e+08	7.05772e+08	537325308	9.31724e+08	Up
1916NEG	Y	PG(22:6/22:6)-H	PG(44:12)-H	PG	(22:6/22:6)	(22:6)	(22:6)		C50 H74 O10 N0 P1	865.503	40.1713	0.000238784	1.14721	421251	3.33657e+06	159290	324566	538456	112695	2.17486e+07	3.38046e+07	3.43592e+07	5.85492e+07	2.84324e+07	1.96573e+07	Up
781POS	Y	SM(d42:3)+H	SM(d42:3)+H	SM	(d42:3)	(d42:3)			C47 H92 O6 N2 P1	811.669	0.423944	0.00503912	1.13965	7.70956e+08	1189455619	6.41906e+08	519637415	7.08867e+08	4.41025e+08	2.74489e+08	290348411	3.37807e+08	4.61345e+08	1.61114e+08	2.85919e+08	Down
1930NEG	Y	PI(16:0/22:6)-H	PI(38:6)-H	PI	(16:0/22:6)	(16:0)	(22:6)		C47 H78 O13 N0 P1	881.519	4.42189	2.89711e-05	1.1368	7.09872e+06	1.58692e+07	7.61787e+06	3.44357e+06	9.39526e+06	5.98668e+06	2.79266e+07	3.50032e+07	4.14197e+07	4.97368e+07	2.68586e+07	3.75461e+07	Up
723POS	Y	PC(38:4p)+H	PC(38:4p)+H	PC	(38:4p)	(38:4p)			C46 H85 O7 N1 P1	794.606	0.531857	0.0296703	1.1297	7.77949e+08	1523707699	868369543	7.03067e+08	9.36152e+08	4.49374e+08	4.1142e+08	4.51537e+08	4.78324e+08	7.74949e+08	2.64677e+08	4.15923e+08	Down
1180POS	Y	TG(22:5/18:2/18:2)+NH4	TG(58:9)+NH4	TG	(22:5/18:2/18:2)	(22:5)	(18:2)	(18:2)	C61 H104 O6 N1	946.786	11.9257	0.00349608	1.1263	6.91681e+07	9.51056e+07	4.06638e+07	1.47481e+07	1.83466e+07	3.04265e+07	1131540519	2.78726e+08	5.11516e+08	3.2194e+08	383417184	5.74418e+08	Up
794POS	Y	TG(18:4/14:0/16:1)+NH4	TG(48:5)+NH4	TG	(18:4/14:0/16:1)	(18:4)	(14:0)	(16:1)	C51 H92 O6 N1	814.692	6.97764	0.00130327	1.11752	1.49153e+08	1.54674e+08	4.6052e+07	2.3442e+07	2.69112e+07	7.10439e+07	5.55391e+08	1.60684e+08	6.67638e+08	5.48916e+08	4.2939e+08	9.26377e+08	Up
1361NEG	Y	Cer(d16:0/18:1+O)-H	Cer(d34:1+O)-H	Cer	(d16:0/18:1+O)	(d16:0)	(18:1+O)		C34 H66 O4 N1	552.5	0.423766	0.0323035	1.10987	1.91757e+08	7.78822e+07	6.19549e+07	113248709	4.95199e+07	1.02819e+08	8.49891e+07	5.34384e+07	4.0269e+07	2.0244e+07	2.62713e+07	2.78532e+07	Down
1796NEG	Y	PE(18:2/22:6)-H	PE(40:8)-H	PE	(18:2/22:6)	(18:2)	(22:6)		C45 H73 O8 N1 P1	786.508	1.79363	0.0245491	1.10734	2.37424e+07	3.50545e+07	3.13718e+07	3.12031e+07	4.83141e+07	2.56255e+07	5.56913e+07	3.33571e+07	6.33952e+07	8.44868e+07	3.28812e+07	8.05044e+07	Up
701POS	Y	PE(18:1/20:3)+Na	PE(38:4)+Na	PE	(18:1/20:3)	(18:1)	(20:3)		C43 H78 O8 N1 P1 Na1	790.536	2.84972	3.28256e-06	1.09606	2.42323e+08	3.28408e+08	3.30924e+08	2.56104e+08	2.71474e+08	2.4583e+08	1005322246	8.19806e+08	7.91257e+08	796672094	5.95251e+08	7.65156e+08	Up
1663NEG	Y	PE(36:3p)-H	PE(36:3p)-H	PE	(36:3p)	(36:3p)			C41 H75 O7 N1 P1	724.529	0.496755	7.19617e-05	1.08946	6.69299e+07	1.09896e+08	8.84379e+07	7.82996e+07	9.85223e+07	8.99871e+07	3.41345e+07	4.85201e+07	5.44954e+07	4.88178e+07	3.82895e+07	4.00528e+07	Down
795POS	Y	TG(16:0/14:4/18:1)+NH4	TG(48:5)+NH4	TG	(16:0/14:4/18:1)	(16:0)	(14:4)	(18:1)	C51 H92 O6 N1	814.692	19.6895	0.000187077	1.08539	3.89399e+07	2.95037e+07	2.03933e+07	1.02903e+07	1.59501e+07	2.30924e+07	6.08338e+08	213539776	5.01256e+08	4.56532e+08	265987793	674847736	Up
720POS	Y	PE(18:0/20:2)+Na	PE(38:2)+Na	PE	(18:0/20:2)	(18:0)	(20:2)		C43 H82 O8 N1 P1 Na1	794.567	0.122403	0.00028322	1.07983	2.3933e+08	3.08007e+08	492581707	3.21451e+08	6.89529e+08	4.3486e+08	5.17652e+07	3.53318e+07	5.12529e+07	7.63083e+07	4.70051e+07	4.26015e+07	Down
1212POS	Y	TG(22:4/18:2/20:4)+NH4	TG(60:10)+NH4	TG	(22:4/18:2/20:4)	(22:4)	(18:2)	(20:4)	C63 H106 O6 N1	972.801	9.55973	0.000227611	1.07823	7.26197e+07	9.52715e+07	3.42889e+07	1.6239e+07	2.63639e+07	4.8097e+07	6.4391e+08	2.16163e+08	3.2638e+08	4.60823e+08	4.65434e+08	6.87143e+08	Up
569POS	Y	PC(34:1e)+H	PC(34:1e)+H	PC	(34:1e)	(34:1e)			C42 H85 O7 N1 P1	746.606	0.645105	0.0421051	1.06083	1085013775	1532090755	9.3913e+08	7.6141e+08	1034023704	578676240	6.96221e+08	619818476	6.63212e+08	9.20684e+08	4.08384e+08	5.17377e+08	Down
1742NEG	Y	PE(20:5/18:2)-H	PE(38:7)-H	PE	(20:5/18:2)	(20:5)	(18:2)		C43 H71 O8 N1 P1	760.492	5.20358	5.19656e-05	1.05101	3.57083e+06	9.78581e+06	5.48733e+06	5.03277e+06	6.40267e+06	4.94484e+06	2.72687e+07	2.33425e+07	3.57127e+07	4.28391e+07	1.9429e+07	3.47005e+07	Up
1155POS	Y	TG(18:2/17:1/22:6)+NH4	TG(57:9)+NH4	TG	(18:2/17:1/22:6)	(18:2)	(17:1)	(22:6)	C60 H102 O6 N1	932.77	76.8183	0.000320462	1.04715	9.78529e+06	8.88458e+06	5.13339e+06	1.69829e+06	2.57097e+06	3.5732e+06	6.2567e+08	1.03454e+08	5.39434e+08	3.21651e+08	3.88735e+08	4.52029e+08	Up
1061POS	Y	TG(16:0/18:1/19:0)+NH4	TG(53:1)+NH4	TG	(16:0/18:1/19:0)	(16:0)	(18:1)	(19:0)	C56 H110 O6 N1	892.833	3.77533	0.00122301	1.03755	1.72447e+08	1.63262e+08	2.31112e+08	8.34754e+07	1.37214e+08	1.3071e+08	8.27599e+08	234819681	5.7492e+08	7.27251e+08	3.82878e+08	719116423	Up
571POS	Y	PE(16:0p/22:6)+H	PE(38:6p)+H	PE	(16:0p/22:6)	(16:0p)	(22:6)		C43 H75 O7 N1 P1	748.528	2.41738	0.00149422	1.03259	3.2089e+08	6.26074e+08	2.99764e+08	282623034	4.68914e+08	2.50295e+08	9.02087e+08	7.5283e+08	9.82632e+08	1282918586	5.00794e+08	1014368342	Up
784POS	Y	PC(38:3)+H	PC(38:3)+H	PC	(38:3)	(38:3)			C46 H87 O8 N1 P1	812.616	0.629537	0.00320586	1.02755	609030534	8.03062e+08	9.85181e+08	6.83496e+08	8.71981e+08	7.37276e+08	473599939	569479740	6.13036e+08	6.06932e+08	3.27366e+08	3.62129e+08	Down
1608NEG	Y	PE(34:2p)-H	PE(34:2p)-H	PE	(34:2p)	(34:2p)			C39 H73 O7 N1 P1	698.513	0.60064	0.00264742	1.02699	8.19648e+07	1.1656e+08	1.20538e+08	8.85975e+07	1.16851e+08	8.96016e+07	3.4852e+07	6.66227e+07	8.00815e+07	8.20649e+07	5.04617e+07	5.47776e+07	Down
79POS	Y	LPC(18:2)+H	LPC(18:2)+H	LPC	(18:2)	(18:2)			C26 H51 O7 N1 P1	520.34	0.432677	0.000127257	1.0086	5.7569e+08	6.09337e+08	5.73635e+08	6.2056e+08	5.23503e+08	3.687e+08	1.09425e+08	2.41888e+08	2.47675e+08	3.7394e+08	2.30923e+08	2.11618e+08	Down
1174POS	Y	TG(16:0/20:4/22:6)+NH4	TG(58:10)+NH4	TG	(16:0/20:4/22:6)	(16:0)	(20:4)	(22:6)	C61 H102 O6 N1	944.77	14.7176	0.000120692	1.00674	3.66746e+07	5.66242e+07	1.51598e+07	1.82603e+07	1.74025e+07	1.45678e+07	5.68244e+08	1.50077e+08	5.07418e+08	4.00506e+08	3.48202e+08	3.61072e+08	Up
