# Supplementary figures and images for: Proteomics and lipidomics reveal the protective mechanism of dietary n-3 PUFA supplementation for photoaging
Source: Royal Society of Chemistry journal article supplement (doi:10.1039/d0fo03228j), 2021-01-01

A

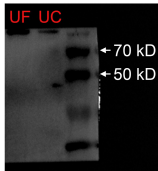

B

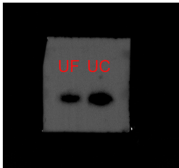

Supplement: d0fo03228j1.pdf [file d0fo03228j1.pdf]
